# Supplementary material for: A Novel Phenazine Analog, CPUL1, Suppresses Autophagic Flux and Proliferation in Hepatocellular Carcinoma: Insight from Integrated Transcriptomic and Metabolomic Analysis
Source: MDPI journal article supplement (doi:10.3390/cancers15051607), 2023-03-05
Supplement: s1 [file s1]

## Supplementary Materials

### **A novel phenazine analog, CPUL1, suppresses autophagic flux and proliferation in hepatocellular carcinoma: insight from integrated transcriptomic and metabolomic analysis**

Jiaqin Chen<sup>1,†</sup>, Dong Feng<sup>2,†</sup>, Yuanyuan Lu<sup>1,†</sup>, Yanjun Zhang<sup>1</sup>, Hanxiang Jiang<sup>1</sup>, Man  
Yuan<sup>3</sup>, Yifan Xu<sup>3</sup>, Jianjun Zou<sup>4,5</sup>, Yubing Zhu<sup>4,5</sup>, Jingjing Zhang<sup>4,5</sup>, Chun Ge<sup>4,5,\*</sup>, Ying  
Wang<sup>1,\*</sup>

<sup>1</sup>*School of Life Science and Technology, China Pharmaceutical University, Nanjing  
211198, China*

<sup>2</sup>*Nanjing Southern Pharmaceutical Technology Co., Ltd., Nanjing 211100, China*

<sup>3</sup>*Department of Clinical Pharmacy, School of Basic Medicine & Clinical Pharmacy,  
China Pharmaceutical University, Nanjing 210009, China*

<sup>4</sup>*Department of Pharmacy, Nanjing First Hospital, Nanjing Medical University,  
Nanjing 210006, China*

<sup>5</sup>*Department of Clinical Pharmacology, Nanjing First Hospital, Nanjing Medical  
University, Nanjing 210006, China*

\*Correspondence:

Chun Ge (gechun901020@163.com), Ying Wang (waying@cpu.edu.cn)

<sup>†</sup>These authors have contributed equally to this work.

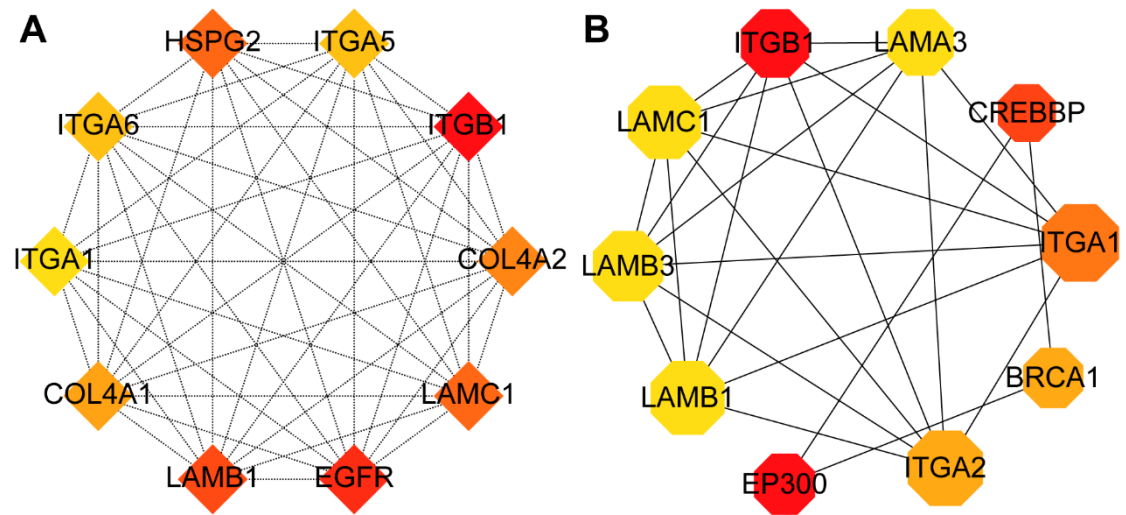

**Figure S1 The top-10 hub gene network.** This network was calculated using the degree algorithm of the Cytohubba plug-in. (A) The hub gene expression in 6h- CPUL1-treated and control. (B) The hub gene expression in 48h- CPUL1-treated and control.

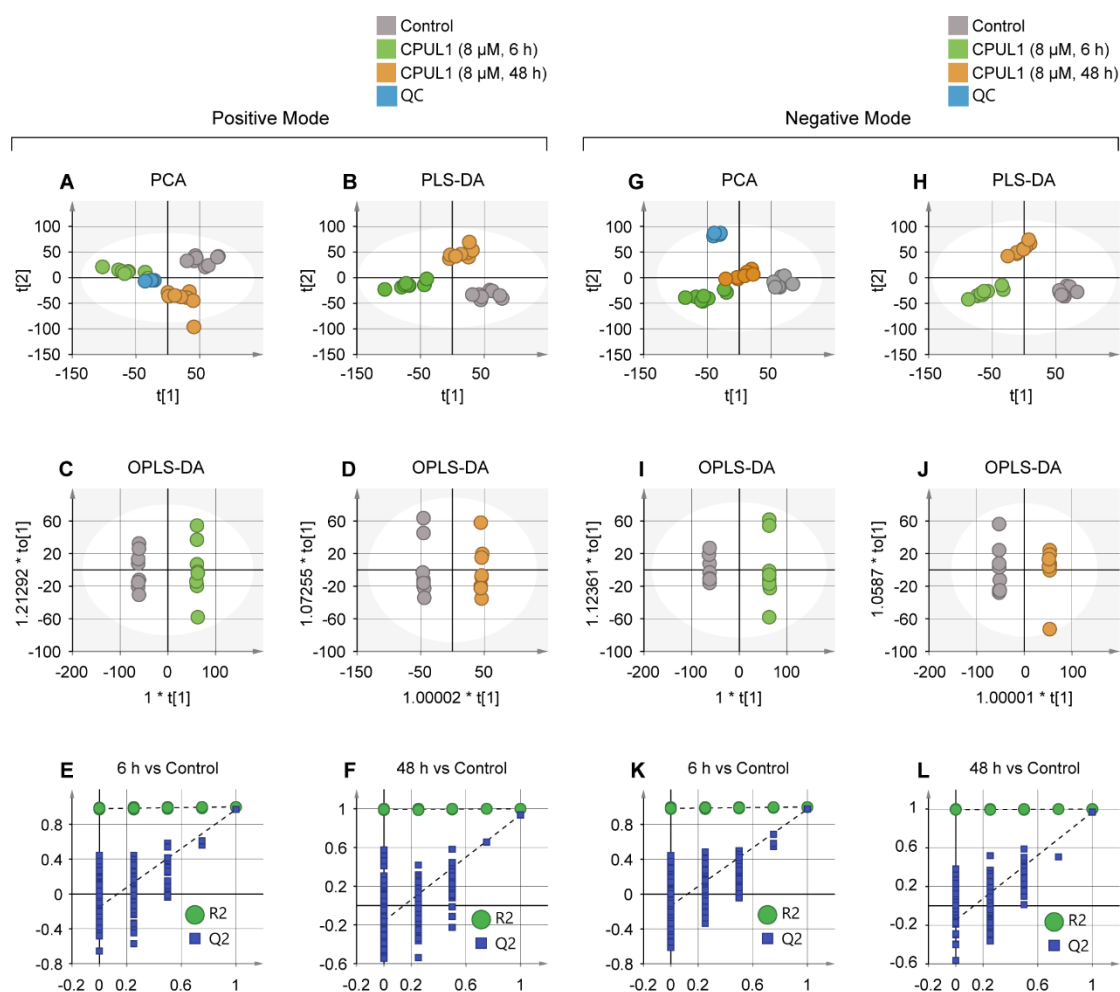

**Figure S2 Metabolomic analysis of CPUL1-treated BEL-7402 cells.** (A) Score plot from the PCA model classifying control, 6h-CPUL1-treated, 48h-CPUL1-treated, and QC groups in positive mode. (B) PLS-DA score plot of control and treated cells in positive mode. (C) OPLS-DA analysis between the control and the 6h-CPUL1-treated groups showed a good separation trend in positive mode. (D) OPLS-DA analysis between the control and the 48h-CPUL1-treated groups showed a good separation trend in positive mode. (E) Permutations plot analysis between the control and the 6h-CPUL1-treated groups showed the intersection of the Q2 regression line and the y-axis was less than zero in positive mode, indicating that the model was valid. (F) Permutations plot analysis between the control and the 48h-CPUL1-treated groups showed the intersection of the Q2 regression line and the y-axis was less than zero in

positive mode, indicating that the model was valid. (G) Score plot from the PCA model classifying control, 6h-CPUL1-treated, 48h-CPUL1-treated, and QC groups in negative mode. (H) PLS-DA score plot of control and treated cells in negative mode. (I) OPLS-DA analysis between the control and the 6h-CPUL1-treated groups showed a good separation trend in negative mode. (J) OPLS-DA analysis between the control and the 48h-CPUL1-treated groups showed a good separation trend in negative mode. (K) Permutations plot analysis between the control and the 6h-CPUL1-treated groups showed the intersection of the Q2 regression line and the y-axis was less than zero in negative mode, indicating that the model was valid. (L) Permutations plot analysis between the control and the 48h-CPUL1-treated groups showed the intersection of the Q2 regression line and the y-axis was less than zero in negative mode, indicating that the model was valid.

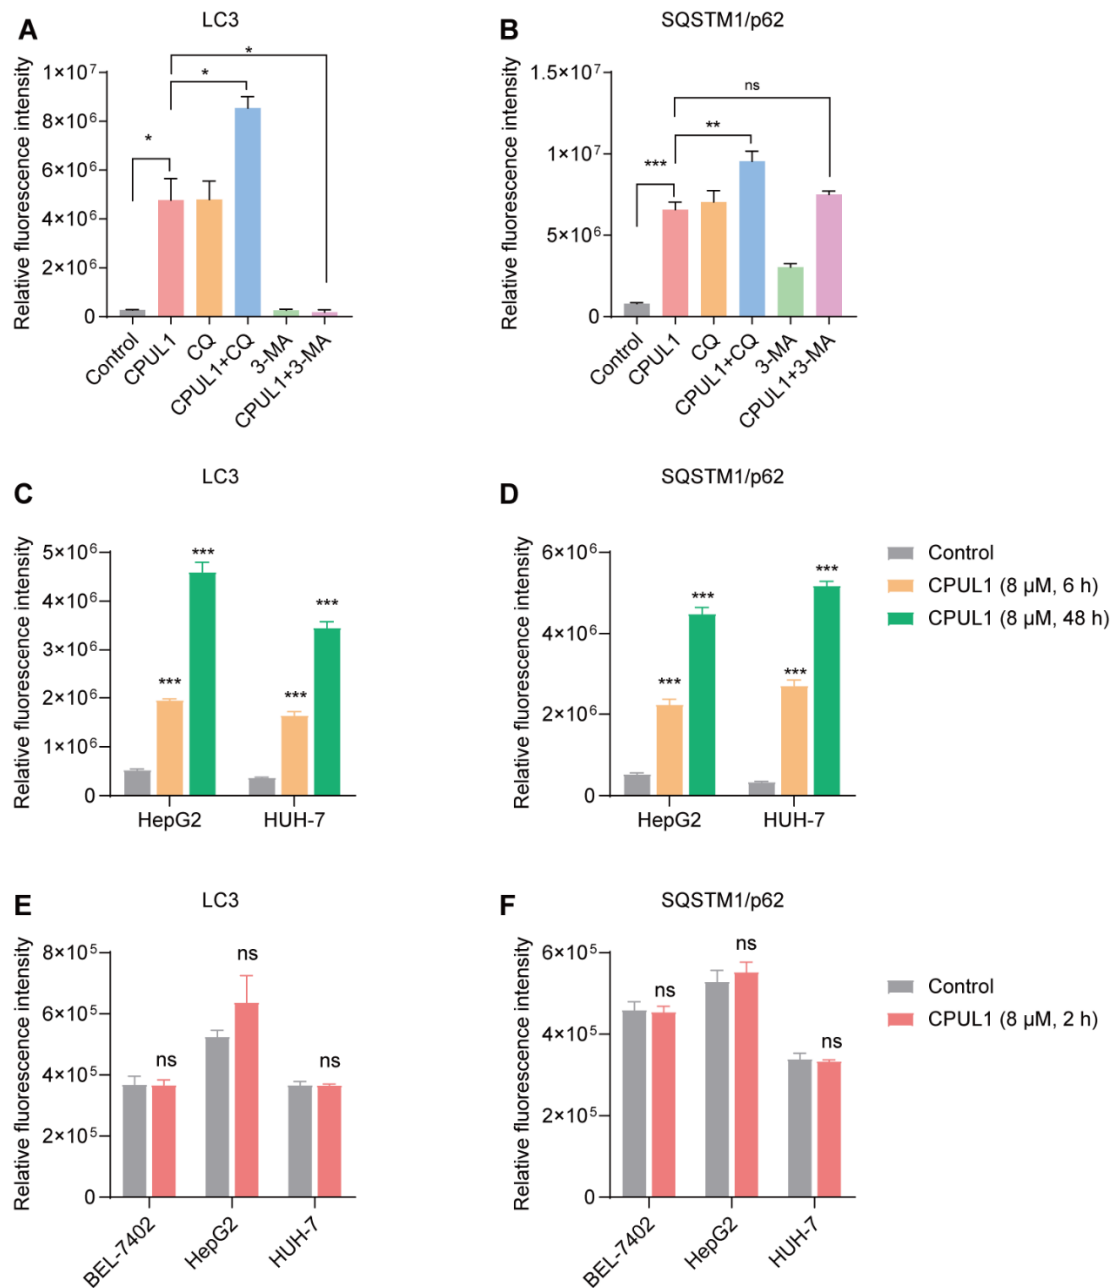

**Figure S3 Quantitative analysis of fluorescent intensity of p62 and LC3 was performed to confirm the protein changes.** (A, B) Fluorescence quantification of LC3 and p62 in BEL-7402 cells treated with CPUL1 (8 μM) and 3-MA (2 mM) or CQ (20 μM) for 48 h. (C, D) Fluorescence quantification of LC3 and p62 in HepG2 and HUH-7 cells treated with CPUL1 (8 μM) for 6 h or 48 h. (E, F) Fluorescence quantification of LC3 and p62 in BEL-7402, HepG2 and HUH-7 cells treated with CPUL1 (8 μM) for 2 h.

**Table S1.** The summary of RNA sequencing data.

| Samples        | Raw reads (Mb) | Clean reads (Mb) | Q30%  | GC%   | Mapping rate |
|----------------|----------------|------------------|-------|-------|--------------|
| BEL-7402-1     | 40.79          | 40.44            | 94.69 | 52.60 | 92.22%       |
| BEL-7402-2     | 36.59          | 36.30            | 94.42 | 52.65 | 93.03%       |
| BEL-7402-3     | 41.87          | 41.56            | 94.49 | 52.78 | 92.71%       |
| BEL-7402-6h-1  | 44.12          | 43.63            | 94.81 | 52.94 | 93.22%       |
| BEL-7402-6h-2  | 41.23          | 40.90            | 94.52 | 53.26 | 93.01%       |
| BEL-7402-6h-3  | 43.22          | 42.80            | 94.80 | 52.83 | 93.03%       |
| BEL-7402-48h-1 | 47.02          | 46.71            | 94.83 | 53.29 | 93.37%       |
| BEL-7402-48h-2 | 49.57          | 49.24            | 94.70 | 53.24 | 93.23%       |
| BEL-7402-48h-3 | 38.61          | 38.29            | 95.01 | 53.31 | 93.46%       |
