# Supplementary material for: A Novel Phenazine Analog, CPUL1, Suppresses Autophagic Flux and Proliferation in Hepatocellular Carcinoma: Insight from Integrated Transcriptomic and Metabolomic Analysis
Source: Cancers (Basel). 2023 Mar 5;15(5):1607. doi: 10.3390/cancers15051607 (PMC10001020; doi:10.3390/cancers15051607)
Supplement: Supplementary file 1 [file cancers-15-01607-s001.zip]

Archive with 8 entries (8 files):
- Original Images for Blot.pdf
- Supplementary File S1.xls
- Supplementary File S2.xls
- Supplementary File S3.xls
- Supplementary File S4.xls
- Supplementary File S6.xls
- Supplementary Materials.pdf
- SupplementaryFile S5.xls
