# Supplementary material for: A Novel Phenazine Analog, CPUL1, Suppresses Autophagic Flux and Proliferation in Hepatocellular Carcinoma: Insight from Integrated Transcriptomic and Metabolomic Analysis
Source: Cancers (Basel). 2023 Mar 5;15(5):1607. doi: 10.3390/cancers15051607 (PMC10001020; doi:10.3390/cancers15051607)
Supplement: Supplementary file 1 [file cancers-15-01607-s001.zip › Supplementary File S1.xls]

Name	geneID	log2FC	P value	Padj	Regulation
LAMB1	ENSG00000091136	-2.201390309	4.29E-108	6.90E-104	Down
IGF2R	ENSG00000197081	-2.409237812	6.93E-101	5.57E-97	Down
SRSF2	ENSG00000161547	1.515358617	8.21E-83	4.40E-79	Ups
FBN2	ENSG00000138829	-2.411081844	2.50E-79	1.00E-75	Down
SLC38A1	ENSG00000111371	-1.657431282	3.06E-66	9.83E-63	Down
COL15A1	ENSG00000204291	-1.652406183	1.11E-65	2.98E-62	Down
PXDN	ENSG00000130508	-1.523879642	2.85E-64	6.54E-61	Down
LAMC1	ENSG00000135862	-1.733920284	6.58E-64	1.32E-60	Down
LRP1	ENSG00000123384	-2.308248981	1.61E-63	2.88E-60	Down
FAT1	ENSG00000083857	-2.428979425	4.76E-63	7.65E-60	Down
UGGT1	ENSG00000136731	-1.60134737	1.32E-61	1.93E-58	Down
COL12A1	ENSG00000111799	-2.455107876	3.85E-61	5.15E-58	Down
LIFR	ENSG00000113594	-1.643130062	2.12E-57	2.62E-54	Down
NOTCH2	ENSG00000134250	-1.626570994	1.18E-56	1.36E-53	Down
ANXA8	ENSG00000265190	1.513747079	1.88E-56	2.01E-53	Ups
TGFBR3	ENSG00000069702	-1.734510792	6.18E-56	6.21E-53	Down
FUS	ENSG00000089280	1.237551114	1.10E-53	1.04E-50	Ups
EGFR	ENSG00000146648	-1.719179074	2.69E-53	2.40E-50	Down
CAVIN3	ENSG00000170955	1.822792218	4.73E-52	4.00E-49	Ups
MET	ENSG00000105976	-1.912623718	1.78E-51	1.43E-48	Down
RBM3	ENSG00000102317	1.11571353	3.38E-50	2.59E-47	Ups
DSG2	ENSG00000046604	-1.805158838	6.14E-49	4.48E-46	Down
LTBP1	ENSG00000049323	-1.845465352	6.37E-47	4.45E-44	Down
NPC1	ENSG00000141458	-1.56604799	2.16E-46	1.45E-43	Down
GLG1	ENSG00000090863	-1.534364888	2.33E-46	1.50E-43	Down
ITPR1	ENSG00000150995	-1.443070414	8.20E-45	5.07E-42	Down
VPS25	ENSG00000131475	1.196410976	1.87E-44	1.12E-41	Ups
FBN1	ENSG00000166147	-1.933703256	3.66E-44	2.10E-41	Down
TEAD1	ENSG00000187079	-1.235989683	1.22E-43	6.78E-41	Down
CREB3L2	ENSG00000182158	-1.185619978	1.43E-43	7.65E-41	Down
SLC6A6	ENSG00000131389	-1.524891288	2.26E-43	1.17E-40	Down
KTN1	ENSG00000126777	-1.67604141	7.90E-43	3.97E-40	Down
ANO6	ENSG00000177119	-1.477460882	1.74E-42	8.48E-40	Down
SLC38A2	ENSG00000134294	-1.346674266	2.22E-42	1.05E-39	Down
TGOLN2	ENSG00000152291	-1.305610284	4.55E-42	2.09E-39	Down
SLC7A2	ENSG00000003989	-1.70395536	7.63E-42	3.41E-39	Down
APP	ENSG00000142192	-1.191444823	5.65E-41	2.45E-38	Down
RARRES2	ENSG00000106538	2.239685904	8.90E-41	3.76E-38	Ups
ITGA5	ENSG00000161638	-1.39967261	1.79E-40	7.39E-38	Down
LGALS3	ENSG00000131981	1.071593374	2.00E-40	8.04E-38	Ups
PTPRF	ENSG00000142949	-1.450759969	2.43E-40	9.52E-38	Down
HMGN2	ENSG00000198830	1.012239269	1.05E-39	4.01E-37	Ups
CANX	ENSG00000127022	-1.066502607	4.44E-39	1.66E-36	Down
LAMB3	ENSG00000196878	-1.45323486	5.45E-39	1.99E-36	Down
PODXL	ENSG00000128567	-1.428523797	6.93E-37	2.48E-34	Down
GFPT1	ENSG00000198380	-1.498009415	7.92E-37	2.77E-34	Down
CD109	ENSG00000156535	-1.937807633	1.07E-36	3.62E-34	Down
ESYT2	ENSG00000117868	-1.109967779	1.08E-36	3.62E-34	Down
AAAS	ENSG00000094914	1.717048746	1.12E-36	3.68E-34	Ups
EIF3A	ENSG00000107581	-1.07689273	3.67E-36	1.18E-33	Down
COQ7	ENSG00000167186	1.412637999	5.51E-35	1.74E-32	Ups
CPD	ENSG00000108582	-1.577641341	1.46E-34	4.53E-32	Down
B9D1	ENSG00000108641	1.44422087	2.24E-34	6.80E-32	Ups
JAG1	ENSG00000101384	-1.583992867	4.65E-34	1.38E-31	Down
TUBB4B	ENSG00000188229	1.00195053	6.13E-34	1.79E-31	Ups
COL4A2	ENSG00000134871	-1.146279658	7.01E-34	2.01E-31	Down
CEMIP2	ENSG00000135048	-1.301819452	2.13E-33	6.02E-31	Down
PRKDC	ENSG00000253729	-1.222649689	2.59E-33	7.17E-31	Down
OSMR	ENSG00000145623	-1.424325973	2.66E-33	7.25E-31	Down
TIMM8B	ENSG00000150779	1.153272309	4.02E-33	1.08E-30	Ups
UQCC2	ENSG00000137288	1.168713076	4.38E-33	1.15E-30	Ups
NUFIP2	ENSG00000108256	-1.206627177	6.82E-33	1.77E-30	Down
ACSL3	ENSG00000123983	-1.250975615	7.67E-33	1.96E-30	Down
TGFBR1	ENSG00000106799	-1.419160089	1.09E-32	2.74E-30	Down
CDK6	ENSG00000105810	-1.201596045	1.51E-32	3.72E-30	Down
CBL	ENSG00000110395	-1.563486205	3.02E-32	7.35E-30	Down
LIMCH1	ENSG00000064042	-1.069648307	3.06E-32	7.35E-30	Down
LANCL2	ENSG00000132434	1.877454883	4.66E-32	1.10E-29	Ups
MPDU1	ENSG00000129255	1.151544481	7.04E-32	1.64E-29	Ups
ADI1	ENSG00000182551	1.557099683	1.71E-31	3.91E-29	Ups
LPP	ENSG00000145012	-1.471799052	1.73E-31	3.91E-29	Down
ALCAM	ENSG00000170017	-1.490489876	1.91E-31	4.24E-29	Down
NOTCH3	ENSG00000074181	-1.403768506	1.93E-31	4.24E-29	Down
LMTK2	ENSG00000164715	-1.24436381	2.21E-31	4.81E-29	Down
SMG1	ENSG00000157106	-1.810292496	2.86E-31	6.13E-29	Down
TOR4A	ENSG00000198113	-1.032306623	6.58E-31	1.39E-28	Down
MUC13	ENSG00000173702	-1.180241696	7.60E-31	1.59E-28	Down
LRP10	ENSG00000197324	-1.18846941	1.17E-30	2.40E-28	Down
METTL1	ENSG00000037897	1.470824145	2.22E-30	4.47E-28	Ups
AFF4	ENSG00000072364	-1.389338072	2.36E-30	4.69E-28	Down
ALDH3A1	ENSG00000108602	1.839649601	2.71E-30	5.31E-28	Ups
KRT17	ENSG00000128422	1.333359402	4.72E-30	9.14E-28	Ups
ITGB4	ENSG00000132470	-1.679444216	5.55E-30	1.06E-27	Down
GOLGB1	ENSG00000173230	-1.554851772	5.81E-30	1.10E-27	Down
INSR	ENSG00000171105	-1.327146634	6.75E-30	1.26E-27	Down
SPAG7	ENSG00000091640	1.113264069	8.19E-30	1.51E-27	Ups
KIDINS220	ENSG00000134313	-1.579690343	1.67E-29	3.05E-27	Down
CZIB	ENSG00000162384	1.226075523	1.70E-29	3.07E-27	Ups
C7orf50	ENSG00000146540	1.021431687	1.95E-29	3.47E-27	Ups
THOC6	ENSG00000131652	1.101054457	2.25E-29	3.98E-27	Ups
CRIM1	ENSG00000150938	-1.293684694	2.53E-29	4.41E-27	Down
SPAG9	ENSG00000008294	-1.216659032	4.76E-29	8.23E-27	Down
SEC63	ENSG00000025796	-1.458247311	6.46E-29	1.10E-26	Down
ITGB1	ENSG00000150093	-1.216083799	7.47E-29	1.26E-26	Down
CKS2	ENSG00000123975	1.063356391	1.32E-28	2.22E-26	Ups
PMF1	ENSG00000160783	1.175713817	2.31E-28	3.83E-26	Ups
AGO2	ENSG00000123908	-1.314215269	2.51E-28	4.11E-26	Down
DMD	ENSG00000198947	-1.354306971	3.30E-28	5.35E-26	Down
FNBP1	ENSG00000187239	-1.103513922	4.33E-28	6.96E-26	Down
ACTL8	ENSG00000117148	2.579158494	5.09E-28	8.02E-26	Ups
L1CAM	ENSG00000198910	-1.000888044	5.49E-28	8.58E-26	Down
KMT2A	ENSG00000118058	-1.428029355	7.21E-28	1.11E-25	Down
TM9SF3	ENSG00000077147	-1.08795174	8.16E-28	1.25E-25	Down
KIRREL1	ENSG00000183853	-1.338756997	9.74E-28	1.48E-25	Down
GPR107	ENSG00000148358	-1.232372085	1.46E-27	2.20E-25	Down
GOLGA4	ENSG00000144674	-1.652969583	1.72E-27	2.54E-25	Down
NNT-AS1	ENSG00000248092	-1.343251072	1.72E-27	2.54E-25	Down
MAOB	ENSG00000069535	1.539513501	2.08E-27	3.03E-25	Ups
HEG1	ENSG00000173706	-1.60070268	2.60E-27	3.77E-25	Down
CDK18	ENSG00000117266	-1.541810369	3.51E-27	5.04E-25	Down
MAGOHB	ENSG00000111196	1.089537082	3.71E-27	5.28E-25	Ups
ROBO1	ENSG00000169855	-1.72104369	6.14E-27	8.44E-25	Down
LMAN1	ENSG00000074695	-1.42224029	7.01E-27	9.56E-25	Down
CDYL2	ENSG00000166446	-1.437099211	8.65E-27	1.17E-24	Down
SLC39A14	ENSG00000104635	-1.222978242	1.08E-26	1.44E-24	Down
TMEM245	ENSG00000106771	-1.26609598	1.19E-26	1.55E-24	Down
TMEM131	ENSG00000075568	-1.324669391	1.21E-26	1.57E-24	Down
QKI	ENSG00000112531	-1.153536932	1.40E-26	1.80E-24	Down
NME1	ENSG00000239672	1.208613554	1.47E-26	1.88E-24	Ups
ESRRA	ENSG00000173153	-1.06669016	1.54E-26	1.95E-24	Down
PTGES2	ENSG00000148334	1.386785562	2.21E-26	2.78E-24	Ups
LRRC58	ENSG00000163428	-1.149886718	3.36E-26	4.16E-24	Down
SLC39A10	ENSG00000196950	-1.462563619	4.69E-26	5.75E-24	Down
IGSF3	ENSG00000143061	-1.237512538	5.11E-26	6.23E-24	Down
POP4	ENSG00000105171	1.137263251	7.38E-26	8.92E-24	Ups
NOMO1	ENSG00000103512	-1.179376787	7.48E-26	8.97E-24	Down
SAMD8	ENSG00000156671	-1.727235484	1.50E-25	1.78E-23	Down
RHOBTB3	ENSG00000164292	-1.224286897	1.87E-25	2.18E-23	Down
PEF1	ENSG00000162517	1.087455053	1.87E-25	2.18E-23	Ups
MRPL24	ENSG00000143314	1.032631644	2.37E-25	2.73E-23	Ups
ZNF106	ENSG00000103994	-1.283244307	2.45E-25	2.80E-23	Down
GRAMD1B	ENSG00000023171	-1.710459293	2.71E-25	3.06E-23	Down
AGRN	ENSG00000188157	-1.090959237	3.10E-25	3.49E-23	Down
AFF1	ENSG00000172493	-1.204855384	4.15E-25	4.57E-23	Down
ITGA6	ENSG00000091409	-1.515694383	4.29E-25	4.69E-23	Down
CD46	ENSG00000117335	-1.12950022	5.53E-25	5.94E-23	Down
PLPP5	ENSG00000147535	1.120479445	5.55E-25	5.94E-23	Ups
LRP6	ENSG00000070018	-1.704326628	5.86E-25	6.24E-23	Down
ANXA8L1	ENSG00000264230	1.320834351	7.69E-25	8.13E-23	Ups
BHLHE40	ENSG00000134107	-1.034827318	8.85E-25	9.24E-23	Down
PDHB	ENSG00000168291	1.090550228	1.56E-24	1.61E-22	Ups
MT1X	ENSG00000187193	3.541833887	1.67E-24	1.71E-22	Ups
ANTXR1	ENSG00000169604	-1.009487767	1.68E-24	1.71E-22	Down
COL4A1	ENSG00000187498	-1.012354176	2.82E-24	2.79E-22	Down
P4HA1	ENSG00000122884	-1.307356134	3.37E-24	3.28E-22	Down
ABLIM1	ENSG00000099204	-1.107031082	3.41E-24	3.31E-22	Down
RPS27L	ENSG00000185088	1.042260711	3.43E-24	3.31E-22	Ups
ADAM9	ENSG00000168615	-1.15193169	6.28E-24	5.80E-22	Down
AHNAK	ENSG00000124942	-1.228331562	7.73E-24	7.06E-22	Down
SLC7A1	ENSG00000139514	-1.083588493	8.10E-24	7.36E-22	Down
AVEN	ENSG00000169857	1.44648297	1.00E-23	9.06E-22	Ups
PTRHD1	ENSG00000184924	1.23355504	1.21E-23	1.08E-21	Ups
MACF1	ENSG00000127603	-1.287552826	1.22E-23	1.09E-21	Down
COL4A4	ENSG00000081052	-1.316485995	1.43E-23	1.26E-21	Down
ZFHX3	ENSG00000140836	-1.451762947	1.81E-23	1.59E-21	Down
DDX46	ENSG00000145833	-1.164638933	1.95E-23	1.70E-21	Down
NDUFAF8	ENSG00000224877	1.163043825	2.03E-23	1.75E-21	Ups
KIF1B	ENSG00000054523	-1.149770908	2.77E-23	2.38E-21	Down
PCNX1	ENSG00000100731	-1.630304904	3.27E-23	2.79E-21	Down
SYNE2	ENSG00000054654	-1.577191687	3.28E-23	2.79E-21	Down
MT1E	ENSG00000169715	3.378438788	3.48E-23	2.93E-21	Ups
GNS	ENSG00000135677	-1.022218471	3.66E-23	3.07E-21	Down
STK4	ENSG00000101109	-1.035031073	4.90E-23	4.08E-21	Down
TOPBP1	ENSG00000163781	-1.085770491	4.94E-23	4.09E-21	Down
XPR1	ENSG00000143324	-1.432541563	5.20E-23	4.29E-21	Down
MICOS13	ENSG00000174917	1.097331766	7.87E-23	6.46E-21	Ups
TARBP2	ENSG00000139546	1.071354787	8.42E-23	6.87E-21	Ups
ALDH16A1	ENSG00000161618	1.145775014	1.15E-22	9.28E-21	Ups
FOXN3-AS1	ENSG00000258920	1.930649415	1.16E-22	9.30E-21	Ups
KIAA1549	ENSG00000122778	-1.183094758	1.32E-22	1.05E-20	Down
MRPL27	ENSG00000108826	1.049095534	1.34E-22	1.06E-20	Ups
VPS13A	ENSG00000197969	-1.33323916	1.38E-22	1.09E-20	Down
KMT2C	ENSG00000055609	-1.47290799	1.43E-22	1.13E-20	Down
GOLIM4	ENSG00000173905	-1.19609652	1.50E-22	1.17E-20	Down
ATRN	ENSG00000088812	-1.254524091	1.53E-22	1.19E-20	Down
CSPG4	ENSG00000173546	-1.048682717	2.06E-22	1.58E-20	Down
PYCR3	ENSG00000104524	1.127188433	2.16E-22	1.64E-20	Ups
SPPL2A	ENSG00000138600	-1.157329096	2.61E-22	1.95E-20	Down
ELL2	ENSG00000118985	-1.35678405	2.76E-22	2.05E-20	Down
GLIS2	ENSG00000126603	-1.115441419	3.84E-22	2.82E-20	Down
ENO2	ENSG00000111674	-1.15395827	4.51E-22	3.28E-20	Down
ZNF121	ENSG00000197961	-1.35649028	4.93E-22	3.56E-20	Down
SLC5A3	ENSG00000198743	-1.46564957	5.13E-22	3.68E-20	Down
SMOC1	ENSG00000198732	-1.170977875	5.20E-22	3.71E-20	Down
CDC42BPA	ENSG00000143776	-1.57642772	5.91E-22	4.20E-20	Down
TANC2	ENSG00000170921	-1.519776582	6.18E-22	4.38E-20	Down
IGF1R	ENSG00000140443	-1.007147781	6.25E-22	4.40E-20	Down
IGF2BP2	ENSG00000073792	-1.36888612	6.54E-22	4.59E-20	Down
PTPRM	ENSG00000173482	-1.280871902	7.67E-22	5.36E-20	Down
BBX	ENSG00000114439	-1.401729028	1.10E-21	7.54E-20	Down
RRP9	ENSG00000114767	1.041046184	1.34E-21	9.09E-20	Ups
IPO7	ENSG00000205339	-1.041120773	1.43E-21	9.65E-20	Down
GPRC5A	ENSG00000013588	-1.001930362	1.56E-21	1.05E-19	Down
RPL26L1	ENSG00000037241	1.130919998	1.88E-21	1.24E-19	Ups
SVIL	ENSG00000197321	-1.10812249	2.28E-21	1.48E-19	Down
NR4A2	ENSG00000153234	-1.271336045	2.29E-21	1.49E-19	Down
RO60	ENSG00000116747	-1.365914338	2.33E-21	1.50E-19	Down
WWC3	ENSG00000047644	-1.175697968	2.85E-21	1.81E-19	Down
MAP3K2	ENSG00000169967	-1.205336322	3.02E-21	1.91E-19	Down
ATP2B1	ENSG00000070961	-1.403409862	3.08E-21	1.94E-19	Down
EMG1	ENSG00000126749	1.009529282	4.43E-21	2.74E-19	Ups
MRPL15	ENSG00000137547	1.161559239	4.62E-21	2.84E-19	Ups
UROS	ENSG00000188690	1.003331404	5.10E-21	3.13E-19	Ups
SNHG7	ENSG00000233016	-1.038405294	5.85E-21	3.58E-19	Down
GTF2H5	ENSG00000272047	1.529357312	6.73E-21	4.08E-19	Ups
SELENOI	ENSG00000138018	-1.19620973	7.84E-21	4.70E-19	Down
AC091729.3	ENSG00000229043	1.390081903	8.13E-21	4.86E-19	Ups
NIPBL	ENSG00000164190	-1.195449886	8.96E-21	5.29E-19	Down
TSHZ2	ENSG00000182463	-1.363080789	9.15E-21	5.39E-19	Down
EPHB2	ENSG00000133216	-1.16364082	1.23E-20	7.09E-19	Down
SYNE1	ENSG00000131018	-1.780339638	1.48E-20	8.48E-19	Down
RRBP1	ENSG00000125844	-1.068552897	1.81E-20	1.03E-18	Down
RIOK3	ENSG00000101782	-1.3173559	2.01E-20	1.14E-18	Down
MSTO1	ENSG00000125459	1.298839145	2.12E-20	1.20E-18	Ups
BORCS8	ENSG00000254901	1.298142022	2.65E-20	1.49E-18	Ups
LPGAT1	ENSG00000123684	-1.039552346	3.23E-20	1.80E-18	Down
ARHGAP35	ENSG00000160007	-1.171520028	4.19E-20	2.29E-18	Down
MED13L	ENSG00000123066	-1.180283165	4.79E-20	2.60E-18	Down
PTPN14	ENSG00000152104	-1.07402899	5.27E-20	2.84E-18	Down
CHD2	ENSG00000173575	-1.128114783	5.45E-20	2.93E-18	Down
TAOK1	ENSG00000160551	-1.305264067	7.44E-20	3.96E-18	Down
TAX1BP3	ENSG00000213977	1.066906678	8.09E-20	4.28E-18	Ups
RPA3	ENSG00000106399	1.070115259	8.66E-20	4.56E-18	Ups
SPRYD4	ENSG00000176422	1.265685245	9.89E-20	5.15E-18	Ups
SELENOW	ENSG00000178980	1.214227467	1.23E-19	6.28E-18	Ups
USP9X	ENSG00000124486	-1.207431784	1.52E-19	7.78E-18	Down
PGPEP1	ENSG00000130517	-1.088524706	1.53E-19	7.79E-18	Down
HSDL2	ENSG00000119471	-1.022196296	1.58E-19	8.00E-18	Down
XPOT	ENSG00000184575	-1.144464424	1.66E-19	8.41E-18	Down
ABL2	ENSG00000143322	-1.17144388	1.69E-19	8.51E-18	Down
SNRNP48	ENSG00000168566	-1.198789821	1.79E-19	8.97E-18	Down
NUDT1	ENSG00000106268	1.075411722	2.16E-19	1.07E-17	Ups
QDPR	ENSG00000151552	1.338769823	2.19E-19	1.08E-17	Ups
PHF21A	ENSG00000135365	-1.476216702	2.37E-19	1.17E-17	Down
ABCC1	ENSG00000103222	-1.052507836	2.42E-19	1.19E-17	Down
MCTP2	ENSG00000140563	-1.880564235	2.60E-19	1.27E-17	Down
ATP2B4	ENSG00000058668	-1.161979863	2.76E-19	1.34E-17	Down
ITPR2	ENSG00000123104	-1.684657988	3.07E-19	1.49E-17	Down
ITPRIP	ENSG00000148841	-1.156652356	3.30E-19	1.59E-17	Down
CHD7	ENSG00000171316	-1.078397071	4.40E-19	2.10E-17	Down
TAB3	ENSG00000157625	-1.14762587	4.71E-19	2.24E-17	Down
MIA3	ENSG00000154305	-1.178047276	9.21E-19	4.25E-17	Down
ABHD2	ENSG00000140526	-1.147526874	1.02E-18	4.68E-17	Down
GJC1	ENSG00000182963	-1.080373835	1.10E-18	5.05E-17	Down
AARS2	ENSG00000124608	1.286453658	1.28E-18	5.83E-17	Ups
ATP13A3	ENSG00000133657	-1.089187444	1.48E-18	6.73E-17	Down
NXPH4	ENSG00000182379	-1.143055171	1.53E-18	6.91E-17	Down
USP3	ENSG00000140455	-1.004046127	1.55E-18	6.98E-17	Down
CEP350	ENSG00000135837	-1.483497412	1.68E-18	7.54E-17	Down
NLRX1	ENSG00000160703	1.078376249	1.89E-18	8.42E-17	Ups
LOXL2	ENSG00000134013	-1.064801148	2.23E-18	9.91E-17	Down
HIVEP2	ENSG00000010818	-1.824584654	2.33E-18	1.03E-16	Down
SLC41A1	ENSG00000133065	-1.207919058	3.13E-18	1.37E-16	Down
NEMP1	ENSG00000166881	-1.001689609	3.26E-18	1.42E-16	Down
CELSR2	ENSG00000143126	-1.074754027	3.41E-18	1.48E-16	Down
ATG9A	ENSG00000198925	-1.0345079	3.47E-18	1.51E-16	Down
PTPN12	ENSG00000127947	-1.182566518	3.70E-18	1.60E-16	Down
HLTF	ENSG00000071794	-1.141872486	4.10E-18	1.76E-16	Down
EXOSC7	ENSG00000075914	1.023270705	4.23E-18	1.81E-16	Ups
PTPRG	ENSG00000144724	-1.755058552	4.80E-18	2.04E-16	Down
RNASEH2C	ENSG00000172922	1.23010575	6.39E-18	2.64E-16	Ups
MBP	ENSG00000197971	-1.178103554	7.96E-18	3.25E-16	Down
APBB3	ENSG00000113108	1.140754023	8.81E-18	3.58E-16	Ups
CYP11A1	ENSG00000140459	1.653408067	9.60E-18	3.89E-16	Ups
SLC16A6	ENSG00000108932	-1.232506322	1.02E-17	4.10E-16	Down
SFMBT2	ENSG00000198879	-1.111401168	1.06E-17	4.25E-16	Down
PCYOX1	ENSG00000116005	-1.030446243	1.08E-17	4.33E-16	Down
FAM160A1	ENSG00000164142	-1.444005463	1.16E-17	4.59E-16	Down
PEAK1	ENSG00000173517	-1.603704762	1.16E-17	4.59E-16	Down
PTPRJ	ENSG00000149177	-1.100918898	1.38E-17	5.44E-16	Down
GSE1	ENSG00000131149	-1.001698066	1.96E-17	7.59E-16	Down
PHF3	ENSG00000118482	-1.323723885	1.97E-17	7.60E-16	Down
UBXN7	ENSG00000163960	-1.006614197	2.02E-17	7.79E-16	Down
C1orf53	ENSG00000203724	1.807041594	2.07E-17	7.97E-16	Ups
ADCK1	ENSG00000063761	1.305691497	2.16E-17	8.26E-16	Ups
NQO1	ENSG00000181019	1.009698324	2.24E-17	8.54E-16	Ups
SEZ6L2	ENSG00000174938	-1.102945714	2.36E-17	8.97E-16	Down
KLF12	ENSG00000118922	-1.537023231	2.40E-17	9.08E-16	Down
FUOM	ENSG00000148803	1.158861641	2.80E-17	1.05E-15	Ups
SRSF8	ENSG00000263465	1.01169858	3.04E-17	1.14E-15	Ups
MRPS28	ENSG00000147586	1.003339305	3.15E-17	1.18E-15	Ups
STT3B	ENSG00000163527	-1.057421078	3.97E-17	1.46E-15	Down
MKS1	ENSG00000011143	1.164988722	4.78E-17	1.74E-15	Ups
CHD1	ENSG00000153922	-1.2317644	4.92E-17	1.78E-15	Down
TP53I3	ENSG00000115129	1.307516647	5.80E-17	2.09E-15	Ups
QSER1	ENSG00000060749	-1.018273007	6.01E-17	2.15E-15	Down
SEL1L	ENSG00000071537	-1.170891169	6.28E-17	2.24E-15	Down
CARMIL1	ENSG00000079691	-1.155047116	6.88E-17	2.43E-15	Down
MARK4	ENSG00000007047	-1.13164467	8.21E-17	2.88E-15	Down
OSGEP	ENSG00000092094	1.170308042	8.49E-17	2.96E-15	Ups
SETD2	ENSG00000181555	-1.013353801	9.01E-17	3.13E-15	Down
SDF2L1	ENSG00000128228	1.044452276	1.15E-16	3.93E-15	Ups
KIAA1671	ENSG00000197077	-1.071738208	1.23E-16	4.19E-15	Down
UBR5	ENSG00000104517	-1.057259536	1.26E-16	4.26E-15	Down
FNDC3A	ENSG00000102531	-1.232687718	1.54E-16	5.14E-15	Down
ELK4	ENSG00000158711	-1.109045062	1.74E-16	5.78E-15	Down
ASH1L	ENSG00000116539	-1.20558285	1.99E-16	6.49E-15	Down
POP5	ENSG00000167272	1.05630059	2.03E-16	6.62E-15	Ups
YES1	ENSG00000176105	-1.181987777	2.52E-16	8.11E-15	Down
SYNM	ENSG00000182253	-1.108402756	3.19E-16	1.02E-14	Down
DENND5B	ENSG00000170456	-1.071517674	3.29E-16	1.04E-14	Down
TRA2A	ENSG00000164548	1.040501615	3.58E-16	1.13E-14	Ups
LCOR	ENSG00000196233	-1.279137704	3.89E-16	1.22E-14	Down
EXOSC10-AS1	ENSG00000230337	2.295498543	4.89E-16	1.51E-14	Ups
MRPS26	ENSG00000125901	1.05398402	4.99E-16	1.54E-14	Ups
NLRC5	ENSG00000140853	1.162713846	5.13E-16	1.58E-14	Ups
TAB2	ENSG00000055208	-1.160730978	5.32E-16	1.63E-14	Down
AKT3	ENSG00000117020	-1.175432878	5.51E-16	1.68E-14	Down
ATRX	ENSG00000085224	-1.236525859	5.74E-16	1.74E-14	Down
TMTC1	ENSG00000133687	-1.392429003	6.41E-16	1.93E-14	Down
SPTLC2	ENSG00000100596	-1.049297539	6.63E-16	1.99E-14	Down
PSME4	ENSG00000068878	-1.132968677	8.19E-16	2.43E-14	Down
USP34	ENSG00000115464	-1.337173234	8.31E-16	2.46E-14	Down
SBF2	ENSG00000133812	-1.142658428	9.72E-16	2.86E-14	Down
PDZD8	ENSG00000165650	-1.281491485	1.05E-15	3.07E-14	Down
RB1CC1	ENSG00000023287	-1.2753043	1.08E-15	3.17E-14	Down
TNKS2	ENSG00000107854	-1.069522961	1.09E-15	3.17E-14	Down
UQCR10	ENSG00000184076	1.002126152	1.15E-15	3.34E-14	Ups
GLIS3	ENSG00000107249	-1.337415329	1.16E-15	3.38E-14	Down
PIEZO2	ENSG00000154864	-1.799251447	1.52E-15	4.36E-14	Down
USP32	ENSG00000170832	-1.236068814	1.53E-15	4.39E-14	Down
N6AMT1	ENSG00000156239	1.34264394	1.69E-15	4.82E-14	Ups
NCEH1	ENSG00000144959	-1.205063706	1.73E-15	4.94E-14	Down
MRPL58	ENSG00000167862	1.053890763	2.10E-15	5.94E-14	Ups
TBC1D2	ENSG00000095383	-1.095791919	2.11E-15	5.96E-14	Down
TTC3	ENSG00000182670	-1.035263017	2.28E-15	6.42E-14	Down
HERC1	ENSG00000103657	-1.34984521	2.86E-15	7.96E-14	Down
SVEP1	ENSG00000165124	-1.515677548	3.05E-15	8.45E-14	Down
PDE3A	ENSG00000172572	-1.013716926	3.32E-15	9.15E-14	Down
ATAD1	ENSG00000138138	-1.022495848	3.68E-15	1.01E-13	Down
RPP40	ENSG00000124787	1.055788526	4.99E-15	1.35E-13	Ups
BOD1L1	ENSG00000038219	-1.315933365	5.04E-15	1.36E-13	Down
DNAJC3	ENSG00000102580	-1.265288915	5.79E-15	1.56E-13	Down
AAK1	ENSG00000115977	-1.189220931	6.41E-15	1.71E-13	Down
CORO2A	ENSG00000106789	-1.193339908	6.50E-15	1.73E-13	Down
MANBA	ENSG00000109323	-1.171562779	7.22E-15	1.91E-13	Down
SRGAP1	ENSG00000196935	-1.170425729	7.64E-15	2.01E-13	Down
PER3	ENSG00000049246	-1.102066802	8.02E-15	2.10E-13	Down
KCNK15	ENSG00000124249	1.469032665	9.64E-15	2.50E-13	Ups
TKFC	ENSG00000149476	1.043590333	9.77E-15	2.52E-13	Ups
SFXN2	ENSG00000156398	1.054633288	1.04E-14	2.68E-13	Ups
SHROOM1	ENSG00000164403	1.113296563	1.67E-14	4.22E-13	Ups
HINT2	ENSG00000137133	1.219046592	1.78E-14	4.45E-13	Ups
ATP11B	ENSG00000058063	-1.416257316	1.97E-14	4.90E-13	Down
TCTA	ENSG00000145022	1.254945332	2.00E-14	4.95E-13	Ups
NDUFC2	ENSG00000151366	1.023783854	2.09E-14	5.15E-13	Ups
VIPR1	ENSG00000114812	1.26020268	2.14E-14	5.27E-13	Ups
MAN1A2	ENSG00000198162	-1.067503287	2.21E-14	5.43E-13	Down
STRN	ENSG00000115808	-1.270338725	2.32E-14	5.68E-13	Down
DIAPH3	ENSG00000139734	-1.065455324	2.44E-14	5.97E-13	Down
CENPS	ENSG00000175279	1.718410882	2.79E-14	6.71E-13	Ups
GPATCH2L	ENSG00000089916	-1.158495992	2.80E-14	6.73E-13	Down
RASSF8	ENSG00000123094	-1.034671787	2.82E-14	6.76E-13	Down
SDK1	ENSG00000146555	-1.247556074	2.96E-14	7.06E-13	Down
PPARA	ENSG00000186951	-1.335860838	3.08E-14	7.32E-13	Down
DDI2	ENSG00000197312	-1.311409086	3.27E-14	7.74E-13	Down
BNIP3L	ENSG00000104765	-1.026574728	3.60E-14	8.48E-13	Down
SBNO1	ENSG00000139697	-1.154629098	3.68E-14	8.66E-13	Down
RPS6KA3	ENSG00000177189	-1.020815565	3.70E-14	8.70E-13	Down
EPHX2	ENSG00000120915	1.624531208	4.37E-14	1.02E-12	Ups
MAN1B1-DT	ENSG00000268996	1.461959968	4.43E-14	1.03E-12	Ups
SNRPGP10	ENSG00000235363	1.050043165	4.43E-14	1.03E-12	Ups
PSD4	ENSG00000125637	1.250796177	5.06E-14	1.16E-12	Ups
LINC02593	ENSG00000223764	1.39521245	5.10E-14	1.17E-12	Ups
PATJ	ENSG00000132849	-1.183686412	5.15E-14	1.18E-12	Down
TM7SF2	ENSG00000149809	1.296564275	5.23E-14	1.19E-12	Ups
PPCDC	ENSG00000138621	1.217528842	5.37E-14	1.22E-12	Ups
PPP3CA	ENSG00000138814	-1.233327487	5.73E-14	1.30E-12	Down
HSD17B8	ENSG00000204228	1.082793074	5.85E-14	1.32E-12	Ups
BCS1L	ENSG00000074582	1.192481651	5.86E-14	1.32E-12	Ups
NCKAP5L	ENSG00000167566	-1.046537074	6.12E-14	1.38E-12	Down
MED13	ENSG00000108510	-1.160079434	6.53E-14	1.46E-12	Down
UTRN	ENSG00000152818	-1.375906814	6.61E-14	1.48E-12	Down
KLF9	ENSG00000119138	-1.599241212	6.90E-14	1.54E-12	Down
MEGF9	ENSG00000106780	-1.016251643	7.00E-14	1.56E-12	Down
HIP1	ENSG00000127946	-1.133860337	7.16E-14	1.59E-12	Down
PHLDB1	ENSG00000019144	1.066824171	8.00E-14	1.77E-12	Ups
NR1D1	ENSG00000126368	-1.156642157	8.39E-14	1.84E-12	Down
INTS13	ENSG00000064102	-1.037591914	8.71E-14	1.91E-12	Down
NF1	ENSG00000196712	-1.098722877	9.62E-14	2.09E-12	Down
SOCS4	ENSG00000180008	-1.224034725	1.03E-13	2.22E-12	Down
COMMD1	ENSG00000173163	1.426344348	1.06E-13	2.27E-12	Ups
IFRD1	ENSG00000006652	-1.160354699	1.09E-13	2.33E-12	Down
GSTZ1	ENSG00000100577	1.138193284	1.17E-13	2.49E-12	Ups
GLI3	ENSG00000106571	-1.465496551	1.22E-13	2.60E-12	Down
ADAM10	ENSG00000137845	-1.081001884	1.51E-13	3.20E-12	Down
PHC3	ENSG00000173889	-1.03083532	1.59E-13	3.34E-12	Down
POMK	ENSG00000185900	-1.014616554	1.65E-13	3.46E-12	Down
TMEM254	ENSG00000133678	1.486354315	1.69E-13	3.54E-12	Ups
USP24	ENSG00000162402	-1.027374089	1.81E-13	3.78E-12	Down
CNNM2	ENSG00000148842	-1.085211441	1.85E-13	3.85E-12	Down
ROCK2	ENSG00000134318	-1.149187492	2.09E-13	4.31E-12	Down
DSC2	ENSG00000134755	-1.319558261	2.27E-13	4.66E-12	Down
SCAMP1	ENSG00000085365	-1.151241543	2.35E-13	4.81E-12	Down
CCPG1	ENSG00000260916	-1.204588015	2.85E-13	5.79E-12	Down
ACVR2B	ENSG00000114739	-1.122083124	3.32E-13	6.73E-12	Down
ZBTB43	ENSG00000169155	-1.121167752	3.54E-13	7.14E-12	Down
NFAT5	ENSG00000102908	-1.246956914	3.76E-13	7.57E-12	Down
UQCC3	ENSG00000204922	1.40145451	3.90E-13	7.82E-12	Ups
SRD5A3	ENSG00000128039	1.639203684	4.11E-13	8.20E-12	Ups
TACSTD2	ENSG00000184292	1.119988394	4.17E-13	8.32E-12	Ups
B3GNT3	ENSG00000179913	-1.080642386	4.53E-13	8.99E-12	Down
TRIM33	ENSG00000197323	-1.021741624	4.63E-13	9.15E-12	Down
IFT46	ENSG00000118096	2.141361486	6.11E-13	1.19E-11	Ups
GTF3C6	ENSG00000155115	1.070469399	6.13E-13	1.19E-11	Ups
CSGALNACT2	ENSG00000169826	-1.11003121	6.42E-13	1.25E-11	Down
HECA	ENSG00000112406	-1.29799922	6.43E-13	1.25E-11	Down
WWC2	ENSG00000151718	-1.244218135	7.35E-13	1.42E-11	Down
DTD1	ENSG00000125821	1.192204475	8.39E-13	1.61E-11	Ups
SLC16A7	ENSG00000118596	-1.472411745	1.07E-12	2.02E-11	Down
HOOK3	ENSG00000168172	-1.195450813	1.22E-12	2.29E-11	Down
PCM1	ENSG00000078674	-1.084609629	1.24E-12	2.32E-11	Down
RNF24	ENSG00000101236	-1.089233358	1.25E-12	2.34E-11	Down
LIN54	ENSG00000189308	-1.338753852	1.34E-12	2.50E-11	Down
FKBP14	ENSG00000106080	-1.361352314	1.49E-12	2.75E-11	Down
PLOD2	ENSG00000152952	-1.230990567	1.61E-12	2.96E-11	Down
IL6ST	ENSG00000134352	-1.280742197	1.63E-12	2.99E-11	Down
SDSL	ENSG00000139410	1.62895834	1.76E-12	3.21E-11	Ups
FOXN3	ENSG00000053254	-1.100153083	1.88E-12	3.42E-11	Down
PYURF	ENSG00000145337	1.013981562	1.90E-12	3.45E-11	Ups
TSFM	ENSG00000123297	1.087018843	2.09E-12	3.78E-11	Ups
ONECUT2	ENSG00000119547	-1.180575531	2.10E-12	3.79E-11	Down
KIAA1958	ENSG00000165185	-1.530384446	2.14E-12	3.85E-11	Down
FBXW9	ENSG00000132004	1.108608484	2.25E-12	4.02E-11	Ups
IDNK	ENSG00000148057	1.582710763	2.27E-12	4.06E-11	Ups
BCYRN1	ENSG00000236824	2.533507742	2.27E-12	4.06E-11	Ups
NIPSNAP3A	ENSG00000136783	1.095109453	2.27E-12	4.06E-11	Ups
TASOR2	ENSG00000108021	-1.042823428	2.38E-12	4.24E-11	Down
DST	ENSG00000151914	-1.192168685	2.71E-12	4.76E-11	Down
SLC39A6	ENSG00000141424	-1.08539152	2.82E-12	4.94E-11	Down
AKAP9	ENSG00000127914	-1.300420896	2.83E-12	4.96E-11	Down
CXADR	ENSG00000154639	-1.376789172	2.88E-12	5.03E-11	Down
PAM	ENSG00000145730	-1.003455255	2.90E-12	5.07E-11	Down
TINAGL1	ENSG00000142910	-1.075596027	3.29E-12	5.69E-11	Down
NFIX	ENSG00000008441	-1.118507555	3.33E-12	5.74E-11	Down
SPATA2L	ENSG00000158792	-1.132836988	3.53E-12	6.08E-11	Down
HES7	ENSG00000179111	-1.335177215	3.68E-12	6.32E-11	Down
HMGN2P3	ENSG00000230330	1.083640429	3.80E-12	6.51E-11	Ups
ADAM12	ENSG00000148848	-1.154234212	3.94E-12	6.72E-11	Down
LRBA	ENSG00000198589	-1.342482397	4.02E-12	6.84E-11	Down
LNPEP	ENSG00000113441	-1.231245431	4.23E-12	7.18E-11	Down
MGA	ENSG00000174197	-1.064136523	4.28E-12	7.25E-11	Down
SNORC	ENSG00000182600	1.465114645	4.37E-12	7.40E-11	Ups
BACH1	ENSG00000156273	-1.195532588	4.43E-12	7.49E-11	Down
TPR	ENSG00000047410	-1.021058344	4.45E-12	7.51E-11	Down
KDM6B	ENSG00000132510	-1.068240086	4.79E-12	8.00E-11	Down
TMEM47	ENSG00000147027	-1.094340934	5.34E-12	8.89E-11	Down
TMCO6	ENSG00000113119	1.002591048	5.51E-12	9.15E-11	Ups
PCBD2	ENSG00000132570	1.317389892	5.71E-12	9.44E-11	Ups
TAGLN	ENSG00000149591	2.002448855	5.93E-12	9.78E-11	Ups
MYCBP2	ENSG00000005810	-1.313426533	6.44E-12	1.06E-10	Down
KIF13B	ENSG00000197892	-1.23620292	6.64E-12	1.08E-10	Down
PIK3C2A	ENSG00000011405	-1.0132237	7.44E-12	1.21E-10	Down
NT5E	ENSG00000135318	-1.12794355	8.13E-12	1.31E-10	Down
PIP5KL1	ENSG00000167103	1.076459948	8.77E-12	1.40E-10	Ups
SORT1	ENSG00000134243	-1.129234372	9.14E-12	1.46E-10	Down
GOLM2	ENSG00000166734	-1.120607324	1.22E-11	1.93E-10	Down
STS	ENSG00000101846	-1.042152913	1.35E-11	2.11E-10	Down
FGD1	ENSG00000102302	-1.349329199	1.44E-11	2.25E-10	Down
TTC17	ENSG00000052841	-1.001579478	1.51E-11	2.35E-10	Down
ZNF37A	ENSG00000075407	-1.153388571	1.57E-11	2.43E-10	Down
VLDLR	ENSG00000147852	-1.662024246	1.62E-11	2.49E-10	Down
LINC02323	ENSG00000259230	1.470507568	1.65E-11	2.54E-10	Ups
SENP5	ENSG00000119231	-1.057805407	1.70E-11	2.61E-10	Down
HELZ	ENSG00000198265	-1.033357333	1.75E-11	2.68E-10	Down
SLC51B	ENSG00000186198	1.560792593	2.21E-11	3.34E-10	Ups
MDN1	ENSG00000112159	-1.177191238	2.25E-11	3.39E-10	Down
MXI1	ENSG00000119950	-1.039729892	2.49E-11	3.72E-10	Down
SERINC1	ENSG00000111897	-1.083886343	2.57E-11	3.85E-10	Down
SPRED2	ENSG00000198369	-1.091344549	2.60E-11	3.88E-10	Down
TMEM134	ENSG00000172663	1.090790622	2.78E-11	4.12E-10	Ups
BAIAP2-DT	ENSG00000226137	-1.293258417	2.83E-11	4.18E-10	Down
IPMK	ENSG00000151151	-1.096795387	3.05E-11	4.49E-10	Down
RICTOR	ENSG00000164327	-1.036713614	3.12E-11	4.59E-10	Down
ALMS1	ENSG00000116127	-1.217451704	3.21E-11	4.72E-10	Down
PAQR5	ENSG00000137819	-1.185574825	3.73E-11	5.45E-10	Down
LINC00467	ENSG00000153363	1.447135842	4.88E-11	7.03E-10	Ups
DSC3	ENSG00000134762	-1.338637321	5.00E-11	7.19E-10	Down
C17orf75	ENSG00000108666	1.206277066	5.06E-11	7.26E-10	Ups
ITGB8	ENSG00000105855	-1.138808266	5.55E-11	7.91E-10	Down
SLC9A6	ENSG00000198689	-1.161470679	5.85E-11	8.31E-10	Down
CEP170	ENSG00000143702	-1.166276671	6.28E-11	8.89E-10	Down
ADAM17	ENSG00000151694	-1.141982337	6.43E-11	9.09E-10	Down
CLIP2	ENSG00000106665	-1.097182278	6.69E-11	9.44E-10	Down
LINC02035	ENSG00000273033	-1.600603748	6.72E-11	9.46E-10	Down
GAB2	ENSG00000033327	-1.095607053	6.81E-11	9.57E-10	Down
SLC12A6	ENSG00000140199	-1.161637805	7.17E-11	1.00E-09	Down
PRKD3	ENSG00000115825	-1.025331505	8.60E-11	1.20E-09	Down
LOXL1	ENSG00000129038	1.298745406	9.89E-11	1.36E-09	Ups
ABCC4	ENSG00000125257	-1.085393008	1.01E-10	1.39E-09	Down
GRID1	ENSG00000182771	-1.078645613	1.05E-10	1.44E-09	Down
BCORL1	ENSG00000085185	-1.130410677	1.07E-10	1.47E-09	Down
SWSAP1	ENSG00000173928	1.527195649	1.08E-10	1.49E-09	Ups
OPLAH	ENSG00000178814	1.025785337	1.11E-10	1.52E-09	Ups
ADAMTS5	ENSG00000154736	-1.096954469	1.20E-10	1.63E-09	Down
MMP15	ENSG00000102996	-1.025815407	1.26E-10	1.71E-09	Down
AARSD1	ENSG00000266967	1.105810138	1.27E-10	1.72E-09	Ups
GAN	ENSG00000261609	-1.314132934	1.30E-10	1.76E-09	Down
OSCP1	ENSG00000116885	1.066253856	1.31E-10	1.77E-09	Ups
LSR	ENSG00000105699	1.622030385	1.47E-10	1.97E-09	Ups
ZNF277	ENSG00000198839	-1.025461706	1.95E-10	2.55E-09	Down
CSNK1G3	ENSG00000151292	-1.099969566	2.15E-10	2.78E-09	Down
SSX2IP	ENSG00000117155	-1.11636543	2.23E-10	2.88E-09	Down
PDS5B	ENSG00000083642	-1.188369306	2.28E-10	2.93E-09	Down
PRKAA2	ENSG00000162409	-1.492118415	2.35E-10	3.02E-09	Down
BMPR2	ENSG00000204217	-1.04710059	2.83E-10	3.57E-09	Down
CSNK1G1	ENSG00000169118	-1.023179498	3.08E-10	3.86E-09	Down
TBC1D5	ENSG00000131374	-1.106204033	3.26E-10	4.08E-09	Down
MAN1A1	ENSG00000111885	-1.06138947	3.38E-10	4.22E-09	Down
MKLN1	ENSG00000128585	-1.086455862	3.41E-10	4.25E-09	Down
GSDME	ENSG00000105928	1.050643373	3.48E-10	4.33E-09	Ups
PEX11G	ENSG00000104883	1.378999983	3.60E-10	4.47E-09	Ups
RALGPS2	ENSG00000116191	-1.327120678	3.84E-10	4.74E-09	Down
MTLN	ENSG00000175701	1.015105278	3.84E-10	4.74E-09	Ups
BMP8B	ENSG00000116985	-1.0187089	3.87E-10	4.78E-09	Down
KRT16	ENSG00000186832	1.376007593	3.90E-10	4.81E-09	Ups
POU2F1	ENSG00000143190	-1.111497688	4.22E-10	5.15E-09	Down
TMEM87B	ENSG00000153214	-1.12016114	4.23E-10	5.16E-09	Down
MPHOSPH6	ENSG00000135698	1.109036367	4.60E-10	5.59E-09	Ups
LIPT2	ENSG00000175536	1.086544983	5.18E-10	6.25E-09	Ups
ITGA1	ENSG00000213949	-1.468729113	5.47E-10	6.57E-09	Down
ACVR1	ENSG00000115170	-1.187179117	5.58E-10	6.69E-09	Down
MAST1	ENSG00000105613	-1.174200411	5.84E-10	6.98E-09	Down
DGKH	ENSG00000102780	-1.316367048	6.60E-10	7.83E-09	Down
ARFGEF1	ENSG00000066777	-1.012020853	7.08E-10	8.36E-09	Down
RBAK	ENSG00000146587	-1.079429796	7.09E-10	8.36E-09	Down
TFRC	ENSG00000072274	-1.423737744	7.62E-10	8.95E-09	Down
SLC7A11	ENSG00000151012	-1.310662631	9.58E-10	1.11E-08	Down
PHLDA1	ENSG00000139289	-1.003389405	9.66E-10	1.12E-08	Down
BMP2	ENSG00000125845	-1.230367045	9.87E-10	1.14E-08	Down
SNHG11	ENSG00000174365	1.075746218	9.94E-10	1.14E-08	Ups
REXO5	ENSG00000005189	1.058489697	1.00E-09	1.15E-08	Ups
SLC17A5	ENSG00000119899	-1.085859348	1.03E-09	1.17E-08	Down
CCDC61	ENSG00000104983	1.106284951	1.09E-09	1.24E-08	Ups
SETD9	ENSG00000155542	1.203427845	1.20E-09	1.35E-08	Ups
C15orf65	ENSG00000261652	-1.275484542	1.29E-09	1.45E-08	Down
SRGAP2C	ENSG00000171943	-1.183664532	1.34E-09	1.50E-08	Down
ARNT2	ENSG00000172379	-1.516673831	1.46E-09	1.62E-08	Down
RAB7B	ENSG00000276600	2.353906935	1.50E-09	1.67E-08	Ups
NID2	ENSG00000087303	-1.20235083	1.72E-09	1.89E-08	Down
SNED1	ENSG00000162804	-1.167714335	1.73E-09	1.91E-08	Down
ZNF791	ENSG00000173875	-1.341317932	2.06E-09	2.23E-08	Down
MDP1	ENSG00000213920	1.667011811	2.07E-09	2.24E-08	Ups
EDN1	ENSG00000078401	1.055152244	2.19E-09	2.36E-08	Ups
DENND4A	ENSG00000174485	-1.264027759	2.32E-09	2.49E-08	Down
MT2A	ENSG00000125148	1.814850363	2.36E-09	2.52E-08	Ups
SNX30	ENSG00000148158	-1.106443356	2.43E-09	2.59E-08	Down
ERBB3	ENSG00000065361	-1.052884986	2.72E-09	2.87E-08	Down
PARD3B	ENSG00000116117	-1.278465228	2.76E-09	2.91E-08	Down
AC091982.3	ENSG00000275765	1.157540134	2.79E-09	2.94E-08	Ups
NSMCE4A	ENSG00000107672	1.019159128	3.17E-09	3.31E-08	Ups
SCFD2	ENSG00000184178	1.155974327	3.20E-09	3.34E-08	Ups
GLIPR2	ENSG00000122694	1.493787431	3.89E-09	4.01E-08	Ups
POMZP3	ENSG00000146707	1.122931084	4.03E-09	4.15E-08	Ups
ARMC9	ENSG00000135931	1.264719381	4.05E-09	4.17E-08	Ups
JMY	ENSG00000152409	-1.119867769	4.27E-09	4.38E-08	Down
ITGAV	ENSG00000138448	-1.168147235	4.42E-09	4.52E-08	Down
AC019171.1	ENSG00000269210	2.063192821	4.72E-09	4.81E-08	Ups
SASH1	ENSG00000111961	-1.063049733	4.82E-09	4.91E-08	Down
SLC12A2	ENSG00000064651	-1.206982665	5.14E-09	5.20E-08	Down
MIR210HG	ENSG00000247095	-1.373449402	5.32E-09	5.38E-08	Down
LOXL3	ENSG00000115318	1.265884184	5.36E-09	5.41E-08	Ups
RFX7	ENSG00000181827	-1.010046564	5.67E-09	5.70E-08	Down
KCNU1	ENSG00000215262	1.420096731	5.75E-09	5.77E-08	Ups
PIK3CD	ENSG00000171608	-1.341021251	5.88E-09	5.88E-08	Down
BIRC6	ENSG00000115760	-1.002830285	7.08E-09	7.00E-08	Down
KIAA1109	ENSG00000138688	-1.194578169	8.50E-09	8.30E-08	Down
ASCC3	ENSG00000112249	-1.047695147	9.20E-09	8.94E-08	Down
ATP11C	ENSG00000101974	-1.354283516	9.77E-09	9.46E-08	Down
ATP7A	ENSG00000165240	-1.528816899	1.01E-08	9.78E-08	Down
SLC45A3	ENSG00000158715	-1.122705927	1.02E-08	9.82E-08	Down
LMBRD2	ENSG00000164187	-1.161426266	1.10E-08	1.06E-07	Down
MOB1B	ENSG00000173542	-1.157837153	1.11E-08	1.06E-07	Down
PTPRK	ENSG00000152894	-1.013227936	1.14E-08	1.09E-07	Down
AC004637.1	ENSG00000267304	1.947011145	1.17E-08	1.11E-07	Ups
KLHDC7A	ENSG00000179023	1.757195284	1.20E-08	1.14E-07	Ups
GSTT2B	ENSG00000133433	1.084613944	1.21E-08	1.15E-07	Ups
HDDC3	ENSG00000184508	1.07797315	1.34E-08	1.26E-07	Ups
TULP4	ENSG00000130338	-1.164239451	1.41E-08	1.33E-07	Down
TBKBP1	ENSG00000198933	-1.235281307	1.47E-08	1.38E-07	Down
ST7L	ENSG00000007341	1.004588706	1.52E-08	1.42E-07	Ups
ADGRG6	ENSG00000112414	-1.801641352	1.58E-08	1.47E-07	Down
EDEM3	ENSG00000116406	-1.119307741	1.78E-08	1.64E-07	Down
ARHGAP32	ENSG00000134909	-1.017050766	1.94E-08	1.77E-07	Down
CYP1A1	ENSG00000140465	2.048625669	1.97E-08	1.80E-07	Ups
ACER3	ENSG00000078124	-1.028651679	2.01E-08	1.83E-07	Down
LINC00466	ENSG00000224209	2.183078703	2.15E-08	1.95E-07	Ups
LNPK	ENSG00000144320	-1.024442812	2.26E-08	2.04E-07	Down
PLEKHG4	ENSG00000196155	1.364251755	2.55E-08	2.29E-07	Ups
LDHD	ENSG00000166816	1.262444596	2.75E-08	2.46E-07	Ups
DYNC1H1	ENSG00000197102	-1.183384295	2.76E-08	2.46E-07	Down
ZNF510	ENSG00000081386	-1.104500244	2.76E-08	2.46E-07	Down
PIKFYVE	ENSG00000115020	-1.048498851	2.85E-08	2.54E-07	Down
DNHD1	ENSG00000179532	-1.075258945	2.86E-08	2.55E-07	Down
DYNLL1	ENSG00000088986	1.783338154	2.91E-08	2.58E-07	Ups
ZDBF2	ENSG00000204186	-1.1597868	3.06E-08	2.70E-07	Down
IFI27L2	ENSG00000119632	1.574491117	3.32E-08	2.90E-07	Ups
SGTB	ENSG00000197860	-1.187417723	3.39E-08	2.95E-07	Down
FAM229B	ENSG00000203778	1.397102363	3.55E-08	3.08E-07	Ups
VPS13C	ENSG00000129003	-1.217564752	3.68E-08	3.19E-07	Down
KIAA0895	ENSG00000164542	-1.170149832	3.77E-08	3.25E-07	Down
REV3L	ENSG00000009413	-1.215524214	3.88E-08	3.33E-07	Down
C11orf54	ENSG00000182919	-1.039833787	4.58E-08	3.89E-07	Down
EIF2AK3	ENSG00000172071	-1.011715745	4.79E-08	4.06E-07	Down
LRRC37A4P	ENSG00000214425	-1.261086792	5.09E-08	4.28E-07	Down
NOG	ENSG00000183691	-1.073646608	5.78E-08	4.81E-07	Down
SECISBP2L	ENSG00000138593	-1.002348898	6.13E-08	5.08E-07	Down
ANKRD12	ENSG00000101745	-1.219726313	6.58E-08	5.42E-07	Down
ALDH4A1	ENSG00000159423	1.037410418	6.59E-08	5.43E-07	Ups
SYNJ1	ENSG00000159082	-1.015741445	6.67E-08	5.49E-07	Down
NEO1	ENSG00000067141	-1.371454433	6.91E-08	5.68E-07	Down
NEXN	ENSG00000162614	-1.062661791	7.01E-08	5.76E-07	Down
IKBKE	ENSG00000263528	1.577105146	7.10E-08	5.82E-07	Ups
NUDT18	ENSG00000275074	1.004675805	8.33E-08	6.74E-07	Ups
ODR4	ENSG00000157181	-1.012701564	8.49E-08	6.86E-07	Down
ZNF784	ENSG00000179922	1.018189533	8.62E-08	6.95E-07	Ups
TLCD4	ENSG00000152078	-1.064866486	8.81E-08	7.09E-07	Down
RABGAP1L	ENSG00000152061	-1.065309795	8.99E-08	7.22E-07	Down
AKR1C2	ENSG00000151632	1.25806889	1.01E-07	8.06E-07	Ups
MAN2A1	ENSG00000112893	-1.043874383	1.29E-07	1.00E-06	Down
ERMP1	ENSG00000099219	-1.306395039	1.35E-07	1.04E-06	Down
PHACTR2	ENSG00000112419	-1.150306682	1.35E-07	1.05E-06	Down
RSF1	ENSG00000048649	-1.035946124	1.36E-07	1.05E-06	Down
PTPRD	ENSG00000153707	-1.397916939	1.53E-07	1.18E-06	Down
MAGI1	ENSG00000151276	-1.516134678	1.60E-07	1.23E-06	Down
BHLHE41	ENSG00000123095	-1.123046737	1.61E-07	1.24E-06	Down
BRWD3	ENSG00000165288	-1.288122336	1.82E-07	1.38E-06	Down
CHD9	ENSG00000177200	-1.002968886	1.83E-07	1.38E-06	Down
USF3	ENSG00000176542	-1.180058099	1.89E-07	1.42E-06	Down
PTPN4	ENSG00000088179	-1.006937987	2.16E-07	1.61E-06	Down
USP46-DT	ENSG00000248866	1.629497068	2.30E-07	1.70E-06	Ups
SLC35B1	ENSG00000121073	1.176746142	2.51E-07	1.85E-06	Ups
SLC4A7	ENSG00000033867	-1.188013987	2.67E-07	1.95E-06	Down
GREB1	ENSG00000196208	-1.25893343	3.03E-07	2.19E-06	Down
SNRPGP15	ENSG00000224543	1.03423986	3.07E-07	2.23E-06	Ups
BIRC3	ENSG00000023445	-1.439079712	3.45E-07	2.48E-06	Down
SLC47A1	ENSG00000142494	1.096919761	4.30E-07	3.05E-06	Ups
USP37	ENSG00000135913	-1.092038472	4.44E-07	3.14E-06	Down
CDK19	ENSG00000155111	-1.073802532	4.62E-07	3.26E-06	Down
MYL9	ENSG00000101335	1.161450151	5.33E-07	3.73E-06	Ups
PRR22	ENSG00000212123	1.299719476	5.44E-07	3.79E-06	Ups
MRPL54	ENSG00000183617	1.375084625	5.87E-07	4.06E-06	Ups
KDM7A	ENSG00000006459	-1.13411912	6.13E-07	4.22E-06	Down
LINC01693	ENSG00000227764	-1.074167254	6.39E-07	4.38E-06	Down
AC012640.2	ENSG00000259802	1.35682394	6.68E-07	4.57E-06	Ups
CERS6	ENSG00000172292	-1.009786638	7.09E-07	4.84E-06	Down
PPP2R3A	ENSG00000073711	-1.525384732	7.51E-07	5.10E-06	Down
SYCE2	ENSG00000161860	1.076282083	8.07E-07	5.44E-06	Ups
GPR35	ENSG00000178623	-1.349066624	8.11E-07	5.47E-06	Down
PRSS16	ENSG00000112812	1.659571743	8.21E-07	5.53E-06	Ups
SSC4D	ENSG00000146700	1.159090022	8.78E-07	5.87E-06	Ups
ADNP-AS1	ENSG00000259456	1.591719246	8.84E-07	5.90E-06	Ups
APC	ENSG00000134982	-1.045789415	9.45E-07	6.28E-06	Down
FNDC11	ENSG00000125531	-1.309283876	1.03E-06	6.82E-06	Down
PPP1R9A	ENSG00000158528	-1.213074582	1.15E-06	7.54E-06	Down
ABCG1	ENSG00000160179	-1.423067142	1.17E-06	7.65E-06	Down
MSRA	ENSG00000175806	1.147328344	1.18E-06	7.73E-06	Ups
SIX4	ENSG00000100625	-1.247783206	1.26E-06	8.18E-06	Down
RALGAPA2	ENSG00000188559	-1.152869514	1.29E-06	8.37E-06	Down
ELAC1	ENSG00000141642	1.372596299	1.30E-06	8.41E-06	Ups
MTX1P1	ENSG00000236675	-1.039865098	1.35E-06	8.71E-06	Down
AL645608.2	ENSG00000230699	-1.443939473	1.38E-06	8.87E-06	Down
TMEM151A	ENSG00000179292	-1.097473972	1.60E-06	1.02E-05	Down
IL2RB	ENSG00000100385	-1.045157385	1.60E-06	1.02E-05	Down
DDHD1	ENSG00000100523	-1.072096647	1.65E-06	1.05E-05	Down
PTGS2	ENSG00000073756	-1.180297	1.66E-06	1.05E-05	Down
DPH6	ENSG00000134146	1.08254065	1.70E-06	1.08E-05	Ups
RBM45	ENSG00000155636	1.170671073	1.94E-06	1.22E-05	Ups
TMEM178B	ENSG00000261115	-1.063115017	2.01E-06	1.26E-05	Down
FRRS1	ENSG00000156869	-1.011859674	2.02E-06	1.26E-05	Down
TIMP4	ENSG00000157150	1.059146707	2.04E-06	1.27E-05	Ups
MBLAC1	ENSG00000214309	1.108782822	2.06E-06	1.29E-05	Ups
ZNF292	ENSG00000188994	-1.106937105	2.07E-06	1.30E-05	Down
GCNT2	ENSG00000111846	-1.038883038	2.22E-06	1.38E-05	Down
AC018521.5	ENSG00000264920	1.254851084	2.25E-06	1.40E-05	Ups
TTBK2	ENSG00000128881	-1.248832617	2.26E-06	1.40E-05	Down
PPP1R3G	ENSG00000219607	-1.039010584	2.36E-06	1.46E-05	Down
AKAP13	ENSG00000170776	-1.139994645	2.38E-06	1.47E-05	Down
THSD4	ENSG00000187720	-1.182092187	2.44E-06	1.51E-05	Down
DIPK1B	ENSG00000165716	1.099429407	2.53E-06	1.56E-05	Ups
SLIT2	ENSG00000145147	-1.348638714	2.56E-06	1.58E-05	Down
ZC3H12C	ENSG00000149289	-1.053631951	2.60E-06	1.60E-05	Down
AHCTF1P1	ENSG00000226121	-1.184400269	2.67E-06	1.64E-05	Down
COA1	ENSG00000106603	1.272329601	2.71E-06	1.66E-05	Ups
AC069277.1	ENSG00000189229	-1.037863981	3.07E-06	1.86E-05	Down
KIAA2026	ENSG00000183354	-1.250136763	3.20E-06	1.94E-05	Down
PSTK	ENSG00000179988	1.043586619	3.36E-06	2.03E-05	Ups
ZNF561-AS1	ENSG00000267106	1.409116833	3.74E-06	2.23E-05	Ups
ZMAT3	ENSG00000172667	-1.123704259	3.80E-06	2.26E-05	Down
UBR4	ENSG00000127481	-1.381141648	3.82E-06	2.27E-05	Down
MCTP1	ENSG00000175471	-1.010481838	4.01E-06	2.38E-05	Down
AC011346.1	ENSG00000247199	-1.280488089	4.31E-06	2.54E-05	Down
PLCB2	ENSG00000137841	1.258707939	4.57E-06	2.67E-05	Ups
CRYAB	ENSG00000109846	1.550696481	5.03E-06	2.91E-05	Ups
CCDC163	ENSG00000280670	1.149790536	5.13E-06	2.96E-05	Ups
C2orf16	ENSG00000221843	1.368048213	5.53E-06	3.18E-05	Ups
AHI1	ENSG00000135541	-1.018164376	5.64E-06	3.24E-05	Down
AP003119.3	ENSG00000261578	-1.059821695	6.24E-06	3.56E-05	Down
MAB21L4	ENSG00000172478	1.755811263	6.38E-06	3.63E-05	Ups
AC006077.2	ENSG00000279799	1.595804796	6.53E-06	3.71E-05	Ups
C16orf95	ENSG00000260456	1.123232888	6.74E-06	3.81E-05	Ups
LRRC3	ENSG00000160233	-1.041353259	7.07E-06	3.98E-05	Down
C11orf71	ENSG00000180425	1.597255452	7.22E-06	4.05E-05	Ups
SMKR1	ENSG00000240204	1.583007333	7.24E-06	4.06E-05	Ups
HOXD-AS2	ENSG00000237380	1.037826	7.40E-06	4.14E-05	Ups
AZIN1-AS1	ENSG00000253320	1.234041443	7.67E-06	4.27E-05	Ups
SP4	ENSG00000105866	-1.024484854	8.22E-06	4.54E-05	Down
HSPG2	ENSG00000142798	-1.339835469	8.38E-06	4.63E-05	Down
PFN4	ENSG00000176732	1.2475542	8.65E-06	4.76E-05	Ups
ULBP1	ENSG00000111981	-1.28220125	8.65E-06	4.76E-05	Down
CNGB1	ENSG00000070729	-1.092986562	9.00E-06	4.93E-05	Down
FAM86C2P	ENSG00000160172	1.060631379	9.00E-06	4.93E-05	Ups
ITGA2	ENSG00000164171	-1.643878454	9.08E-06	4.97E-05	Down
MRPL1	ENSG00000169288	1.081616457	9.12E-06	4.99E-05	Ups
CRACD	ENSG00000109265	-1.223069711	9.86E-06	5.36E-05	Down
AL365181.2	ENSG00000272068	-1.095116351	1.00E-05	5.43E-05	Down
RCOR2	ENSG00000167771	-1.241521842	1.00E-05	5.45E-05	Down
LINC02166	ENSG00000260259	1.543980554	1.01E-05	5.45E-05	Ups
KCTD17	ENSG00000100379	1.716710453	1.02E-05	5.54E-05	Ups
DMAC1	ENSG00000137038	1.235174141	1.06E-05	5.71E-05	Ups
INO80D	ENSG00000114933	-1.07977527	1.07E-05	5.78E-05	Down
COL4A5	ENSG00000188153	-1.166949645	1.07E-05	5.78E-05	Down
ETV1	ENSG00000006468	-1.579250172	1.15E-05	6.17E-05	Down
SNORA73B	ENSG00000200087	1.39878637	1.21E-05	6.44E-05	Ups
H2AC8	ENSG00000277075	1.118742769	1.22E-05	6.52E-05	Ups
H2BC20P	ENSG00000261716	-1.095681707	1.24E-05	6.60E-05	Down
PPP1R3B	ENSG00000173281	-1.012032759	1.24E-05	6.62E-05	Down
MYLPF	ENSG00000180209	1.417883217	1.25E-05	6.67E-05	Ups
FGD6	ENSG00000180263	-1.10935237	1.49E-05	7.82E-05	Down
GPT	ENSG00000167701	1.315213667	1.49E-05	7.82E-05	Ups
TCP11L2	ENSG00000166046	-1.31054789	1.52E-05	7.96E-05	Down
TAS1R3	ENSG00000169962	1.02872743	1.53E-05	7.99E-05	Ups
FAM86JP	ENSG00000171084	1.046990981	1.60E-05	8.31E-05	Ups
RTTN	ENSG00000176225	-1.041185362	1.70E-05	8.78E-05	Down
NBEA	ENSG00000172915	-1.437916885	1.71E-05	8.85E-05	Down
TUBAP5	ENSG00000214796	1.467471931	1.78E-05	9.15E-05	Ups
SMOX	ENSG00000088826	-1.054752102	1.90E-05	9.72E-05	Down
CPA4	ENSG00000128510	1.681992033	1.97E-05	0.000100798	Ups
AP001781.1	ENSG00000254990	-1.674166494	2.05E-05	0.000104416	Down
AC093484.4	ENSG00000266651	1.251834273	2.10E-05	0.00010668	Ups
CLOCK	ENSG00000134852	-1.001160149	2.13E-05	0.000107917	Down
TRPC1	ENSG00000144935	-1.020937632	2.14E-05	0.000108396	Down
DNM1	ENSG00000106976	-1.029678339	2.19E-05	0.000110602	Down
AL023583.1	ENSG00000272209	-1.629644363	2.23E-05	0.000112415	Down
DPF1	ENSG00000011332	1.206741682	2.41E-05	0.000120459	Ups
ASRGL1	ENSG00000162174	1.337928966	2.46E-05	0.000122551	Ups
AC093297.2	ENSG00000272335	-1.16562735	2.71E-05	0.000133648	Down
SAAL1	ENSG00000166788	1.005891215	2.71E-05	0.000133738	Ups
GNGT2	ENSG00000167083	1.646277225	2.80E-05	0.000137974	Ups
ARRDC4	ENSG00000140450	-1.122807626	2.91E-05	0.000142647	Down
ABHD11-AS1	ENSG00000225969	1.401189481	2.94E-05	0.00014409	Ups
HSPA1B	ENSG00000204388	1.23874559	2.95E-05	0.000144822	Ups
ZNF619	ENSG00000177873	1.438582206	2.97E-05	0.000145521	Ups
SESN3	ENSG00000149212	-1.132879096	3.01E-05	0.000147158	Down
AK9	ENSG00000155085	-1.310952785	3.05E-05	0.000148734	Down
LINC01124	ENSG00000222033	1.398374368	3.21E-05	0.000156034	Ups
MT2P1	ENSG00000162840	1.604603559	3.59E-05	0.000173027	Ups
AP000759.1	ENSG00000255320	-1.495459	4.01E-05	0.000191548	Down
UBE2D4	ENSG00000078967	1.145303433	4.02E-05	0.000191927	Ups
BOLA3	ENSG00000163170	1.380413577	4.24E-05	0.000201449	Ups
AL118558.3	ENSG00000271780	1.200803939	4.51E-05	0.000213849	Ups
MRGPRF	ENSG00000172935	1.224069388	4.65E-05	0.000219606	Ups
ZNF18	ENSG00000154957	1.011416308	4.77E-05	0.000224786	Ups
LINGO2	ENSG00000174482	-1.384853869	4.94E-05	0.000232236	Down
PCDH1	ENSG00000156453	-1.466154949	5.41E-05	0.000252443	Down
SYDE2	ENSG00000097096	-1.082470921	5.69E-05	0.000264494	Down
GS1-124K5.4	ENSG00000237310	1.199889033	5.71E-05	0.000265413	Ups
NKAPP1	ENSG00000233382	1.455821493	6.15E-05	0.000283522	Ups
REPS2	ENSG00000169891	-1.320666025	6.40E-05	0.000294362	Down
BATF3	ENSG00000123685	1.089399047	6.66E-05	0.000305451	Ups
TSNAXIP1	ENSG00000102904	1.421559367	6.80E-05	0.000311305	Ups
SCAPER	ENSG00000140386	-1.031361292	6.98E-05	0.000318261	Down
DHRS2	ENSG00000100867	1.130080059	8.08E-05	0.000363072	Ups
CHKB-DT	ENSG00000205559	1.404394529	9.08E-05	0.000403994	Ups
AC018665.1	ENSG00000279382	1.088187978	9.86E-05	0.000435871	Ups
AC133552.5	ENSG00000275494	1.442498902	9.90E-05	0.00043712	Ups
CBLN3	ENSG00000139899	1.264243737	9.94E-05	0.000438776	Ups
PPFIA4	ENSG00000143847	-1.40758863	9.97E-05	0.000440083	Down
CACNA1B	ENSG00000148408	1.49217341	0.000105887	0.000464965	Ups
MDFI	ENSG00000112559	1.14114767	0.000106206	0.000465984	Ups
AL353807.5	ENSG00000287839	-1.247317063	0.000106671	0.000467641	Down
FTCDNL1	ENSG00000226124	1.189107797	0.000110467	0.000482703	Ups
ACTR3C	ENSG00000106526	1.086832646	0.000113898	0.000496349	Ups
SNRPGP2	ENSG00000264350	1.051924514	0.000114423	0.000498232	Ups
TNFRSF10A-AS1	ENSG00000253930	-1.110694937	0.000119633	0.000517968	Down
FAM83A	ENSG00000147689	-1.195417518	0.000120782	0.000522523	Down
ZC3H11A	ENSG00000058673	-1.29912393	0.000125371	0.000540774	Down
DEPDC1-AS1	ENSG00000234264	1.505457108	0.000137524	0.000588145	Ups
AC064836.2	ENSG00000273456	1.488554387	0.000138383	0.00059103	Ups
AC022007.1	ENSG00000206567	-1.15193619	0.000146337	0.00062203	Down
SNHG25	ENSG00000266402	1.197550785	0.000147964	0.000628282	Ups
MUC16	ENSG00000181143	-1.373187944	0.000152503	0.000645507	Down
AP000648.4	ENSG00000280385	-1.166986611	0.000168743	0.000707909	Down
LINC01186	ENSG00000236751	1.083504346	0.000168869	0.000708255	Ups
LINC02747	ENSG00000255774	1.078788482	0.000169232	0.000709221	Ups
ZNF813	ENSG00000198346	-1.10215025	0.000171564	0.000717684	Down
YPEL2	ENSG00000175155	-1.216204011	0.000177992	0.000742255	Down
TC2N	ENSG00000165929	-1.170555963	0.000181463	0.000755751	Down
AC113607.1	ENSG00000234796	-1.459219227	0.000181617	0.000756196	Down
NTSR2	ENSG00000169006	1.35996902	0.000186558	0.000775304	Ups
AL356740.3	ENSG00000269376	-1.058898577	0.000204906	0.000844417	Down
FGF22	ENSG00000070388	1.315240255	0.000208122	0.00085657	Ups
GALNT13	ENSG00000144278	-1.333454331	0.000209201	0.000860354	Down
Metazoa_SRP	ENSG00000280502	1.284993067	0.000214056	0.000878297	Ups
AC008966.1	ENSG00000247796	1.035572399	0.000218026	0.000893902	Ups
COA6-AS1	ENSG00000231663	1.037768615	0.00022872	0.000934887	Ups
TRIM72	ENSG00000177238	1.426295305	0.000230321	0.000940713	Ups
CCDC187	ENSG00000260220	1.013392753	0.000231015	0.000942835	Ups
GLYCTK	ENSG00000168237	1.218239732	0.00023286	0.000949394	Ups
SPEN	ENSG00000065526	-1.033220903	0.000244863	0.00099249	Down
DIO3	ENSG00000197406	1.023127865	0.000247491	0.001002181	Ups
AC010894.1	ENSG00000226853	1.404627709	0.000260186	0.001049888	Ups
TEN1-CDK3	ENSG00000261408	1.020177504	0.000260519	0.001050968	Ups
RIBC1	ENSG00000158423	1.036797459	0.000268776	0.001078862	Ups
PNMA2	ENSG00000240694	-1.000929148	0.000270984	0.00108626	Down
ZNF280B	ENSG00000275004	-1.10077656	0.000275968	0.001104973	Down
SEPTIN4	ENSG00000108387	1.268843817	0.000281438	0.001124634	Ups
HSPA1A	ENSG00000204389	1.188072869	0.000286553	0.001143368	Ups
PCDHAC2	ENSG00000243232	-1.000590902	0.000291757	0.001161216	Down
SPEF1	ENSG00000101222	1.269063505	0.000302176	0.001198563	Ups
S100A1	ENSG00000160678	1.142048945	0.000314037	0.001241324	Ups
IL23A	ENSG00000110944	1.383890198	0.000323903	0.001277495	Ups
PTMAP4	ENSG00000231503	1.000101831	0.000326937	0.001287879	Ups
LINC00163	ENSG00000234880	-1.242785571	0.000329668	0.001298003	Down
CEMIP	ENSG00000103888	-1.266672078	0.000351806	0.001377742	Down
SAMD15	ENSG00000100583	1.167088722	0.000384808	0.001492441	Ups
PLEKHG1	ENSG00000120278	-1.08748966	0.000420201	0.001616452	Down
AC004706.3	ENSG00000282936	-1.034224317	0.000444963	0.001700314	Down
TLR6	ENSG00000174130	-1.327632028	0.000447071	0.001707154	Down
AC004801.6	ENSG00000276814	-1.380148385	0.000454977	0.001733224	Down
AP001107.5	ENSG00000254510	1.36137666	0.000515884	0.001944514	Ups
AL731566.2	ENSG00000273891	1.331958627	0.00052768	0.001982931	Ups
GRAMD2A	ENSG00000175318	1.357511932	0.000551279	0.002064555	Ups
PRMT6	ENSG00000198890	1.138055643	0.000566969	0.002115738	Ups
HMCN1	ENSG00000143341	-1.307435223	0.000568982	0.002122263	Down
PCOTH	ENSG00000205861	1.01760047	0.000584782	0.002176147	Ups
HULC	ENSG00000285219	1.198230765	0.000590254	0.002194479	Ups
CXCL2	ENSG00000081041	1.203352169	0.000593499	0.002205524	Ups
PGM2L1	ENSG00000165434	-1.010487801	0.000644889	0.002374538	Down
AC005332.5	ENSG00000277476	-1.077644571	0.000659648	0.002421671	Down
SMIM27	ENSG00000235453	1.011600938	0.000661364	0.002425756	Ups
TPPP3	ENSG00000159713	1.265722333	0.000714115	0.002594963	Ups
C9orf116	ENSG00000160345	1.030276645	0.000758038	0.00273786	Ups
B4GALT7	ENSG00000027847	1.024593112	0.000787176	0.002833553	Ups
LAMA5-AS1	ENSG00000228812	1.162562418	0.000793356	0.002854518	Ups
SNAPIN	ENSG00000143553	1.036335978	0.000820106	0.002940238	Ups
HTR1D	ENSG00000179546	1.152481464	0.000828796	0.002966101	Ups
AC106886.5	ENSG00000280211	1.31521672	0.000847337	0.003024377	Ups
GALNT9	ENSG00000182870	1.043127856	0.00085006	0.003030937	Ups
Z94160.1	ENSG00000237862	1.045735746	0.000866173	0.003079299	Ups
AL109976.1	ENSG00000277287	1.110201317	0.000886316	0.003143263	Ups
MDGA1	ENSG00000112139	1.267647171	0.000941505	0.003317761	Ups
RASA4B	ENSG00000170667	-1.039386209	0.000954653	0.003356739	Down
LINC01063	ENSG00000232065	1.294060967	0.000990771	0.003466297	Ups
KCNAB1	ENSG00000169282	-1.251377545	0.000996666	0.003484645	Down
LCN15	ENSG00000177984	1.251019803	0.001013891	0.003537946	Ups
ARMCX2	ENSG00000184867	1.228178233	0.001030076	0.003589748	Ups
RFX3	ENSG00000080298	-1.145097761	0.001033328	0.003597181	Down
AC004854.2	ENSG00000272768	1.189953629	0.001044365	0.003629313	Ups
ROBO3	ENSG00000154134	1.173635153	0.001052933	0.003656718	Ups
SVIL2P	ENSG00000234814	-1.255882676	0.001056848	0.003666356	Down
VEGFC	ENSG00000150630	-1.282699814	0.001080091	0.003738115	Down
GRHL1	ENSG00000134317	-1.182264804	0.001122783	0.003873359	Down
C10orf143	ENSG00000237489	1.17212748	0.001140722	0.003931416	Ups
PI3	ENSG00000124102	1.139216992	0.001163506	0.004001823	Ups
TNK2-AS1	ENSG00000224614	-1.282422829	0.001167887	0.004015175	Down
LINC02585	ENSG00000228350	1.008391696	0.001172533	0.004028561	Ups
CATSPER2P1	ENSG00000205771	1.027131964	0.001175576	0.004037123	Ups
CASC8	ENSG00000246228	1.066993756	0.001198027	0.004101251	Ups
AL135744.1	ENSG00000260830	1.227223364	0.001233998	0.004211594	Ups
CHMP6	ENSG00000176108	1.064592401	0.001249134	0.004258979	Ups
LINC01806	ENSG00000227403	1.013571534	0.001250314	0.004262095	Ups
TTC5	ENSG00000136319	1.070239406	0.00125543	0.004276814	Ups
FOXP3	ENSG00000049768	1.274104394	0.001257305	0.004282297	Ups
TGFBI	ENSG00000120708	1.085595207	0.001286138	0.004369391	Ups
AC020558.2	ENSG00000265511	1.06964351	0.001296493	0.004399596	Ups
TMEM54	ENSG00000121900	1.027099471	0.001304418	0.004423079	Ups
PCAT19	ENSG00000267107	1.262834967	0.001308565	0.004436206	Ups
KRT13	ENSG00000171401	1.173822834	0.0013132	0.004448168	Ups
CRYBG3	ENSG00000080200	-1.091057841	0.001340239	0.004529259	Down
TSPEAR-AS2	ENSG00000182912	1.241952935	0.001360742	0.004588901	Ups
TNFRSF8	ENSG00000120949	1.244825644	0.001382194	0.004655384	Ups
ZNF555	ENSG00000186300	-1.051500334	0.001391938	0.00468624	Down
LOX	ENSG00000113083	-1.064105367	0.001410062	0.004741301	Down
LINC01391	ENSG00000244578	1.031320107	0.001468977	0.004919625	Ups
TMEM18-DT	ENSG00000233296	1.251684485	0.001469216	0.004919625	Ups
GOLGA6L9	ENSG00000197978	-1.139065159	0.001538439	0.005123669	Down
AC135506.1	ENSG00000270441	-1.085680509	0.00156047	0.005185777	Down
RPL37AP8	ENSG00000176343	1.114731735	0.001572642	0.005219869	Ups
FAXC	ENSG00000146267	1.221484058	0.001592906	0.005277732	Ups
FZD4	ENSG00000174804	-1.13789741	0.001650702	0.00544466	Down
ZNNT1	ENSG00000261087	-1.220493261	0.001658367	0.005466458	Down
AC036214.1	ENSG00000249328	-1.217492001	0.001674715	0.00551582	Down
TNFRSF14	ENSG00000157873	-1.190923612	0.00169249	0.005569798	Down
AC126768.1	ENSG00000248597	-1.014983857	0.00173561	0.005695378	Down
AL121906.1	ENSG00000271803	-1.23143418	0.001783223	0.00583376	Down
ALOX12B	ENSG00000179477	1.230233188	0.001843059	0.006006287	Ups
AL136040.1	ENSG00000273783	1.195573263	0.001851108	0.006030072	Ups
TMPRSS5	ENSG00000166682	1.163250893	0.001904686	0.006187056	Ups
LINC00842	ENSG00000285294	1.004458895	0.001914714	0.006215862	Ups
CCDC153	ENSG00000248712	1.015465059	0.001932143	0.006259453	Ups
DYRK4	ENSG00000010219	1.181733415	0.001948501	0.006307713	Ups
DYNC2H1	ENSG00000187240	-1.09981423	0.001951033	0.006314639	Down
TEC	ENSG00000135605	-1.168836315	0.001976437	0.006391711	Down
SLC16A11	ENSG00000174326	-1.21302552	0.00211004	0.006763908	Down
TAMM41	ENSG00000144559	1.027966689	0.00211975	0.00678962	Ups
ANGPTL2	ENSG00000136859	1.031221868	0.002489385	0.007828511	Ups
AC041005.1	ENSG00000287185	-1.060269641	0.002508054	0.007879349	Down
OASL	ENSG00000135114	1.192510728	0.002527322	0.007933848	Ups
SLC25A21-AS1	ENSG00000258708	1.150494569	0.002532891	0.007946675	Ups
H4C3	ENSG00000197061	1.054325847	0.002538071	0.007961371	Ups
AC019080.4	ENSG00000271996	-1.128563495	0.002559242	0.008019958	Down
AC067930.4	ENSG00000255050	-1.050784099	0.002593456	0.008109784	Down
KIAA0040	ENSG00000235750	-1.043314052	0.002679503	0.00833992	Down
GGACT	ENSG00000134864	1.18198521	0.002727348	0.008462623	Ups
EDRF1-DT	ENSG00000224023	1.15793413	0.002734516	0.008475048	Ups
AL358334.2	ENSG00000258711	1.145897472	0.002808355	0.008677132	Ups
ATP5MF-PTCD1	ENSG00000248919	1.167457804	0.002847528	0.008788033	Ups
MMACHC	ENSG00000132763	1.018044267	0.00301914	0.009259003	Ups
MAPK8IP2	ENSG00000008735	-1.011805009	0.003075639	0.009410731	Down
ATP8A1	ENSG00000124406	-1.154027703	0.003191293	0.009711002	Down
CFAP58	ENSG00000120051	-1.158316404	0.003196514	0.00972321	Down
LINC02816	ENSG00000225857	-1.161932666	0.003256112	0.009882058	Down
TBC1D3P6	ENSG00000224966	-1.094327158	0.003321214	0.01005875	Down
AP003486.1	ENSG00000255455	-1.019435897	0.003329857	0.010081127	Down
KLRG2	ENSG00000188883	1.0840375	0.00333366	0.010089568	Ups
SLC26A1	ENSG00000145217	-1.150903787	0.003509149	0.010556341	Down
ZNF22-AS1	ENSG00000165511	1.00449745	0.003509811	0.010556354	Ups
AC007773.1	ENSG00000267213	1.146508268	0.003669585	0.010995759	Ups
AC102953.1	ENSG00000225981	-1.134255323	0.003680105	0.011017015	Down
AC009403.1	ENSG00000216895	1.042871879	0.003693783	0.011049732	Ups
ISM1	ENSG00000101230	1.134080349	0.003890576	0.011573816	Ups
TMEM266	ENSG00000169758	1.009628137	0.003916163	0.011628415	Ups
RNF32-AS1	ENSG00000224903	-1.116108563	0.004016532	0.011884736	Down
Z97192.3	ENSG00000235111	1.111148521	0.004123904	0.012168849	Ups
LGSN	ENSG00000146166	-1.068988847	0.004171495	0.012293483	Down
AL023284.4	ENSG00000260418	-1.065576574	0.004224846	0.012437031	Down
H2AC17	ENSG00000278677	1.00748125	0.004260938	0.01253639	Ups
ZFR2	ENSG00000105278	-1.126812909	0.004270333	0.012554841	Down
PPFIBP2	ENSG00000166387	1.102021343	0.0043025	0.012630932	Ups
AC046143.1	ENSG00000229334	1.113247947	0.004303564	0.012631749	Ups
AL592166.1	ENSG00000225721	1.003012677	0.00433575	0.012712297	Ups
DNAH7	ENSG00000118997	1.112997896	0.004398986	0.012871879	Ups
ADAMTS14	ENSG00000138316	1.068615645	0.00462948	0.013475198	Ups
GPR143	ENSG00000101850	1.113612753	0.004707294	0.013684351	Ups
LDB3	ENSG00000122367	1.019596961	0.004757318	0.013809795	Ups
HID1	ENSG00000167861	1.095488429	0.004796264	0.013910291	Ups
AC096536.2	ENSG00000242396	1.111184614	0.004799737	0.013915342	Ups
KCNQ1-AS1	ENSG00000229414	1.104934104	0.004977101	0.01436221	Ups
MYEOV	ENSG00000172927	-1.088271111	0.00516473	0.014829113	Down
AC012676.3	ENSG00000277170	1.086365804	0.005235868	0.015017271	Ups
CRPPA	ENSG00000214960	1.035106145	0.005275713	0.015115373	Ups
KIF7	ENSG00000166813	1.032947457	0.005311804	0.015205229	Ups
AC008946.1	ENSG00000267939	1.035371573	0.005316492	0.015213782	Ups
PTPRR	ENSG00000153233	-1.078286704	0.005386071	0.015387682	Down
NPL	ENSG00000135838	1.089682247	0.00544395	0.015522692	Ups
CKMT1A	ENSG00000223572	1.081018011	0.00575861	0.016315724	Ups
LINC02482	ENSG00000251580	1.087933553	0.005849992	0.016555557	Ups
AL139352.1	ENSG00000132832	1.067787969	0.005988676	0.016890168	Ups
AL121749.2	ENSG00000287528	1.076957754	0.006401244	0.017871899	Ups
CYP4F29P	ENSG00000228314	1.040025318	0.006423328	0.017924218	Ups
PDE9A	ENSG00000160191	-1.056501016	0.006717736	0.01863912	Down
AC023090.1	ENSG00000267015	1.069028574	0.006730881	0.018672243	Ups
COL4A2-AS1	ENSG00000232814	1.062875288	0.006836822	0.018922232	Ups
AC121757.2	ENSG00000287051	1.015988412	0.007087602	0.019540438	Ups
CCL26	ENSG00000006606	1.057287925	0.007119236	0.019597404	Ups
DYNLRB2	ENSG00000168589	1.04789801	0.007322194	0.020097591	Ups
AC007613.1	ENSG00000262420	1.007964371	0.007355525	0.020173358	Ups
CHRM1	ENSG00000168539	1.03990776	0.007373226	0.020213504	Ups
GAS2	ENSG00000148935	1.051680702	0.007508885	0.020553862	Ups
AC120498.9	ENSG00000274751	1.031015775	0.007695104	0.020979464	Ups
AL132656.2	ENSG00000244733	-1.048909318	0.007903979	0.021478087	Down
AC145207.9	ENSG00000278876	1.048588633	0.007938327	0.021560264	Ups
RAB11FIP1P1	ENSG00000228492	-1.048586698	0.007939585	0.021560264	Down
LINC01389	ENSG00000225762	1.026012208	0.008345752	0.022518682	Ups
NACAD	ENSG00000136274	-1.039732098	0.008348635	0.022522681	Down
AC000093.1	ENSG00000284874	1.04096803	0.008394609	0.022637024	Ups
AC112191.2	ENSG00000254373	1.038483572	0.008417625	0.022689761	Ups
AL359220.1	ENSG00000247287	-1.008258978	0.008592651	0.023099576	Down
AP001347.1	ENSG00000224905	-1.009792225	0.00869893	0.023350141	Down
AC092683.1	ENSG00000230606	-1.021950086	0.009046564	0.024174295	Down
SYT11	ENSG00000132718	-1.013405159	0.009198185	0.024529534	Down
BOLA2P2	ENSG00000271161	1.017545142	0.009463044	0.025114234	Ups
KLHDC8B	ENSG00000185909	1.013560018	0.009906692	0.026172553	Ups
AC013394.1	ENSG00000279765	1.018407103	0.009933877	0.026235748	Ups
AL590428.1	ENSG00000231652	1.01619333	0.010094497	0.026611863	Ups
AC120498.3	ENSG00000260403	1.014606568	0.010105793	0.026632907	Ups
H2AC14	ENSG00000276368	1.007982397	0.01041807	0.027338149	Ups
GPR132	ENSG00000183484	-1.005930004	0.010794982	0.028185826	Down
