# Supplementary material for: A Novel Phenazine Analog, CPUL1, Suppresses Autophagic Flux and Proliferation in Hepatocellular Carcinoma: Insight from Integrated Transcriptomic and Metabolomic Analysis
Source: Cancers (Basel). 2023 Mar 5;15(5):1607. doi: 10.3390/cancers15051607 (PMC10001020; doi:10.3390/cancers15051607)
Supplement: Supplementary file 1 [file cancers-15-01607-s001.zip › Supplementary File S2.xls]

Name	geneID	log2FC	P value	Padj	Regulation
ITPR1	ENSG00000150995	-2.36479974	2.43E-126	3.89E-122	Down
CREB3L2	ENSG00000182158	-1.46496869	9.69E-96	7.76E-92	Down
CPS1	ENSG00000021826	-1.698318138	3.86E-94	2.06E-90	Down
IGF2R	ENSG00000197081	-2.149779671	4.11E-91	1.64E-87	Down
PRKDC	ENSG00000253729	-1.622083562	4.49E-88	1.44E-84	Down
FAT1	ENSG00000083857	-2.800823734	4.06E-85	1.08E-81	Down
COL15A1	ENSG00000204291	-2.094797832	7.97E-84	1.82E-80	Down
PXDN	ENSG00000130508	-1.722153087	5.68E-78	1.14E-74	Down
UGGT1	ENSG00000136731	-2.001208563	1.04E-77	1.85E-74	Down
LIFR	ENSG00000113594	-1.894542935	2.99E-76	4.79E-73	Down
SLC38A1	ENSG00000111371	-1.790367765	1.00E-73	1.46E-70	Down
TGOLN2	ENSG00000152291	-1.509304711	2.86E-72	3.82E-69	Down
FBN2	ENSG00000138829	-2.272834185	6.53E-65	8.05E-62	Down
LTBP1	ENSG00000049323	-2.306598749	1.53E-64	1.75E-61	Down
TEAD1	ENSG00000187079	-1.395327351	3.25E-63	3.47E-60	Down
CDK6	ENSG00000105810	-1.649029876	8.89E-63	8.90E-60	Down
NOTCH2	ENSG00000134250	-1.740760351	4.15E-62	3.91E-59	Down
CEMIP2	ENSG00000135048	-1.852572284	2.56E-61	2.28E-58	Down
MYOF	ENSG00000138119	-1.165874746	2.76E-61	2.33E-58	Down
LAMB1	ENSG00000091136	-1.740062039	2.18E-60	1.74E-57	Down
TGFBR1	ENSG00000106799	-1.785045817	7.51E-58	5.72E-55	Down
DSP	ENSG00000096696	-1.39540583	1.02E-56	7.46E-54	Down
MET	ENSG00000105976	-2.059551628	6.31E-56	4.39E-53	Down
LPL	ENSG00000175445	-1.502624678	1.47E-55	9.78E-53	Down
SLC7A1	ENSG00000139514	-1.354810434	2.26E-55	1.45E-52	Down
CANX	ENSG00000127022	-1.318868402	3.79E-55	2.33E-52	Down
ESYT2	ENSG00000117868	-1.228608116	2.02E-53	1.20E-50	Down
CNOT1	ENSG00000125107	-1.358302055	3.92E-53	2.24E-50	Down
LAMB3	ENSG00000196878	-1.583017019	4.65E-53	2.56E-50	Down
DSG2	ENSG00000046604	-2.17073974	1.86E-52	9.91E-50	Down
EIF3A	ENSG00000107581	-1.201681059	5.29E-52	2.73E-49	Down
LAMC1	ENSG00000135862	-1.715235408	9.52E-52	4.76E-49	Down
ATP2A2	ENSG00000174437	-1.293165125	2.30E-51	1.12E-48	Down
NPC1	ENSG00000141458	-1.470628118	7.55E-51	3.56E-48	Down
MKI67	ENSG00000148773	-1.279937568	1.02E-50	4.67E-48	Down
SEMA3C	ENSG00000075223	-2.723983695	2.88E-50	1.28E-47	Down
AHNAK	ENSG00000124942	-1.087852599	9.46E-50	4.09E-47	Down
CUX1	ENSG00000257923	-1.173663312	1.36E-49	5.75E-47	Down
GLG1	ENSG00000090863	-1.809151545	5.04E-49	2.07E-46	Down
NSD1	ENSG00000165671	-1.463307269	1.15E-48	4.60E-46	Down
SCD	ENSG00000099194	-1.090298693	1.64E-48	6.41E-46	Down
IGF1R	ENSG00000140443	-1.362860341	7.13E-48	2.72E-45	Down
LIMCH1	ENSG00000064042	-1.224328907	1.22E-47	4.36E-45	Down
TGFBR3	ENSG00000069702	-1.734995886	1.23E-47	4.36E-45	Down
SYNE2	ENSG00000054654	-1.865761376	3.18E-47	1.11E-44	Down
PTPN14	ENSG00000152104	-1.448865807	7.11E-47	2.42E-44	Down
IQGAP1	ENSG00000140575	-1.552730918	3.12E-46	1.04E-43	Down
ROBO1	ENSG00000169855	-2.126297581	4.82E-45	1.57E-42	Down
PCYOX1	ENSG00000116005	-1.646132878	1.89E-44	6.07E-42	Down
SMG1	ENSG00000157106	-1.835603445	1.94E-44	6.08E-42	Down
KPNB1	ENSG00000108424	-1.081897982	3.24E-44	9.98E-42	Down
LPP	ENSG00000145012	-1.544494409	4.09E-44	1.24E-41	Down
AFF4	ENSG00000072364	-1.50492242	2.32E-42	6.89E-40	Down
LRRC58	ENSG00000163428	-1.354910281	2.96E-42	8.63E-40	Down
ALCAM	ENSG00000170017	-1.774754689	6.78E-42	1.94E-39	Down
SLC39A10	ENSG00000196950	-1.795081381	7.59E-42	2.13E-39	Down
PRRC2C	ENSG00000117523	-1.227375397	8.97E-42	2.48E-39	Down
ARHGAP35	ENSG00000160007	-1.181777877	3.53E-40	9.59E-38	Down
ADAM9	ENSG00000168615	-1.46912437	4.40E-40	1.17E-37	Down
MBNL3	ENSG00000076770	-1.582824514	6.04E-40	1.58E-37	Down
KIF26B	ENSG00000162849	-1.859221953	1.05E-39	2.71E-37	Down
SPPL2A	ENSG00000138600	-1.542729931	1.17E-39	2.97E-37	Down
ANO2	ENSG00000047617	-1.386829111	1.30E-39	3.24E-37	Down
ANTXR1	ENSG00000169604	-1.368977828	1.78E-39	4.38E-37	Down
RABAC1	ENSG00000105404	1.244375902	2.51E-39	6.08E-37	Ups
FNBP1	ENSG00000187239	-1.035927031	7.45E-39	1.75E-36	Down
SOAT1	ENSG00000057252	-1.41177533	2.04E-38	4.74E-36	Down
SP1	ENSG00000185591	-1.129877686	2.84E-38	6.50E-36	Down
SPTBN1	ENSG00000115306	-1.054050413	4.26E-38	9.62E-36	Down
AGO2	ENSG00000123908	-1.010292968	6.76E-38	1.48E-35	Down
MUC13	ENSG00000173702	-1.167342927	6.77E-38	1.48E-35	Down
MTR	ENSG00000116984	-1.384294885	1.85E-37	4.01E-35	Down
MACF1	ENSG00000127603	-1.375224154	2.69E-37	5.75E-35	Down
ABLIM1	ENSG00000099204	-1.283217396	2.84E-37	5.99E-35	Down
BTBD3	ENSG00000132640	-1.004464057	3.12E-37	6.48E-35	Down
CD109	ENSG00000156535	-1.995639674	1.11E-36	2.28E-34	Down
WNK1	ENSG00000060237	-1.094908242	1.15E-36	2.33E-34	Down
PDK4	ENSG00000004799	-1.365331415	1.52E-36	3.05E-34	Down
DIP2B	ENSG00000066084	-1.269770253	1.78E-36	3.52E-34	Down
DYNC1H1	ENSG00000197102	-1.196716318	2.03E-36	3.96E-34	Down
ANO6	ENSG00000177119	-1.396180222	3.65E-36	7.05E-34	Down
ZFHX3	ENSG00000140836	-1.405908495	4.51E-36	8.59E-34	Down
SLC38A2	ENSG00000134294	-1.319294952	1.17E-35	2.20E-33	Down
TACC1	ENSG00000147526	-1.339591071	2.00E-35	3.73E-33	Down
CRIM1	ENSG00000150938	-1.503808585	2.16E-35	3.97E-33	Down
MYO10	ENSG00000145555	-1.029389157	2.58E-35	4.69E-33	Down
KIDINS220	ENSG00000134313	-1.900445056	2.80E-35	5.04E-33	Down
COL4A2	ENSG00000134871	-1.217249507	2.86E-35	5.09E-33	Down
KMT2A	ENSG00000118058	-1.175638284	6.88E-35	1.20E-32	Down
ABL2	ENSG00000143322	-1.596998531	6.89E-35	1.20E-32	Down
ACSL3	ENSG00000123983	-1.394216203	7.53E-35	1.30E-32	Down
COL4A4	ENSG00000081052	-1.473418618	9.11E-35	1.55E-32	Down
STK4	ENSG00000101109	-1.189986544	1.46E-34	2.46E-32	Down
TMEM131	ENSG00000075568	-1.638953377	1.53E-34	2.55E-32	Down
FBN1	ENSG00000166147	-2.626048852	1.78E-34	2.94E-32	Down
CPD	ENSG00000108582	-1.872755133	1.84E-34	3.01E-32	Down
GNS	ENSG00000135677	-1.253201717	3.57E-34	5.77E-32	Down
BAZ1B	ENSG00000009954	-1.052467026	3.68E-34	5.88E-32	Down
NPNT	ENSG00000168743	-1.290304805	5.08E-34	8.05E-32	Down
GPR107	ENSG00000148358	-1.185937688	6.30E-34	9.88E-32	Down
ECPAS	ENSG00000136813	-1.124538944	7.59E-34	1.18E-31	Down
SIK2	ENSG00000170145	-1.098877197	7.98E-34	1.23E-31	Down
RALGAPB	ENSG00000170471	-1.211268472	1.34E-33	2.04E-31	Down
RANBP2	ENSG00000153201	-1.669590143	1.38E-33	2.09E-31	Down
IARS2	ENSG00000067704	-1.172248456	3.54E-33	5.30E-31	Down
KMT2C	ENSG00000055609	-1.413180316	4.96E-33	7.35E-31	Down
SGPL1	ENSG00000166224	-1.08715893	8.45E-33	1.24E-30	Down
DNER	ENSG00000187957	-1.367760791	1.52E-32	2.19E-30	Down
AFF1	ENSG00000172493	-1.303084489	1.60E-32	2.28E-30	Down
PTGES2	ENSG00000148334	1.363314655	2.27E-32	3.19E-30	Ups
NOMO1	ENSG00000103512	-1.273405381	2.87E-32	4.00E-30	Down
ATRN	ENSG00000088812	-1.601408131	4.10E-32	5.62E-30	Down
ABHD2	ENSG00000140526	-1.533454403	6.65E-32	9.02E-30	Down
HGSNAT	ENSG00000165102	-1.010727293	7.56E-32	1.02E-29	Down
SPEN	ENSG00000065526	-1.220037524	1.04E-31	1.38E-29	Down
IARS1	ENSG00000196305	-1.077829202	1.25E-31	1.65E-29	Down
GOLIM4	ENSG00000173905	-1.598689951	1.31E-31	1.72E-29	Down
TRIP12	ENSG00000153827	-1.377258345	2.23E-31	2.90E-29	Down
NIPBL	ENSG00000164190	-1.570280388	2.54E-31	3.29E-29	Down
CBL	ENSG00000110395	-1.12521099	2.62E-31	3.36E-29	Down
OSMR	ENSG00000145623	-1.509598973	2.70E-31	3.43E-29	Down
ASH1L	ENSG00000116539	-1.354901388	5.31E-31	6.69E-29	Down
GFPT1	ENSG00000198380	-1.215047914	7.09E-31	8.87E-29	Down
SFT2D2	ENSG00000213064	-1.20839033	9.39E-31	1.17E-28	Down
CALU	ENSG00000128595	-1.103352656	1.52E-30	1.87E-28	Down
TAOK1	ENSG00000160551	-1.531277229	2.13E-30	2.60E-28	Down
CLTC	ENSG00000141367	-1.113496965	2.34E-30	2.84E-28	Down
L1CAM	ENSG00000198910	-1.115037488	2.41E-30	2.90E-28	Down
CCDC6	ENSG00000108091	-1.001315798	3.10E-30	3.71E-28	Down
CCDC47	ENSG00000108588	-1.384433932	3.15E-30	3.74E-28	Down
SPTAN1	ENSG00000197694	-1.086003162	3.49E-30	4.11E-28	Down
POMK	ENSG00000185900	-1.490826888	3.73E-30	4.35E-28	Down
SEL1L	ENSG00000071537	-1.742914043	6.17E-30	7.16E-28	Down
BOD1L1	ENSG00000038219	-1.707568328	6.35E-30	7.32E-28	Down
ITGA6	ENSG00000091409	-1.739939679	9.65E-30	1.10E-27	Down
IGSF3	ENSG00000143061	-1.100828071	1.21E-29	1.37E-27	Down
GAPVD1	ENSG00000165219	-1.373671256	1.47E-29	1.66E-27	Down
VPS13A	ENSG00000197969	-1.487473702	1.60E-29	1.79E-27	Down
PTPN11	ENSG00000179295	-1.072024373	1.76E-29	1.95E-27	Down
FZD6	ENSG00000164930	-1.440697488	1.93E-29	2.13E-27	Down
CREBBP	ENSG00000005339	-1.007966022	1.99E-29	2.18E-27	Down
GOLGB1	ENSG00000173230	-1.477979439	2.53E-29	2.76E-27	Down
LPGAT1	ENSG00000123684	-1.332953481	3.26E-29	3.53E-27	Down
LRRFIP1	ENSG00000124831	-1.183391788	3.71E-29	3.97E-27	Down
NUFIP2	ENSG00000108256	-1.037951223	6.13E-29	6.50E-27	Down
SLC5A3	ENSG00000198743	-1.609863399	7.94E-29	8.36E-27	Down
TOPBP1	ENSG00000163781	-1.217964389	8.80E-29	9.21E-27	Down
TMEM245	ENSG00000106771	-1.310026248	1.66E-28	1.72E-26	Down
ATP11A	ENSG00000068650	-1.235798042	2.09E-28	2.15E-26	Down
LMTK2	ENSG00000164715	-1.065309465	3.34E-28	3.41E-26	Down
CKAP5	ENSG00000175216	-1.375795556	3.49E-28	3.54E-26	Down
COBL	ENSG00000106078	-1.037211984	4.19E-28	4.22E-26	Down
INSR	ENSG00000171105	-1.274102581	5.47E-28	5.47E-26	Down
LRP1	ENSG00000123384	-2.127512902	6.87E-28	6.84E-26	Down
GOLGA4	ENSG00000144674	-1.627000807	9.34E-28	9.23E-26	Down
QSER1	ENSG00000060749	-1.333014131	1.52E-27	1.48E-25	Down
TARS1	ENSG00000113407	-1.033868277	2.19E-27	2.12E-25	Down
RPS27L	ENSG00000185088	1.093351226	2.27E-27	2.18E-25	Ups
ST3GAL1	ENSG00000008513	-1.029277465	2.40E-27	2.29E-25	Down
APP	ENSG00000142192	-1.196917259	3.32E-27	3.14E-25	Down
HUWE1	ENSG00000086758	-1.043378083	3.37E-27	3.17E-25	Down
EIF2AK2	ENSG00000055332	-1.197162608	4.01E-27	3.75E-25	Down
CLIC4	ENSG00000169504	-1.117156732	4.09E-27	3.81E-25	Down
CENPF	ENSG00000117724	-1.304512216	4.72E-27	4.37E-25	Down
SPAG9	ENSG00000008294	-1.16816472	5.05E-27	4.65E-25	Down
AGPS	ENSG00000018510	-1.109726068	5.28E-27	4.83E-25	Down
PDE3A	ENSG00000172572	-1.343265369	5.40E-27	4.91E-25	Down
SEC63	ENSG00000025796	-1.359955862	5.89E-27	5.33E-25	Down
USP9X	ENSG00000124486	-1.301817609	8.72E-27	7.85E-25	Down
MED1	ENSG00000125686	-1.221870483	9.30E-27	8.27E-25	Down
RB1	ENSG00000139687	-1.178543443	1.14E-26	1.01E-24	Down
PBRM1	ENSG00000163939	-1.702753419	1.18E-26	1.03E-24	Down
TPR	ENSG00000047410	-1.527234943	2.09E-26	1.81E-24	Down
HECTD1	ENSG00000092148	-1.541098693	2.10E-26	1.81E-24	Down
TMSB4X	ENSG00000205542	1.04132258	2.16E-26	1.86E-24	Ups
TM9SF3	ENSG00000077147	-1.035411199	2.27E-26	1.94E-24	Down
ADNP	ENSG00000101126	-1.022226946	4.79E-26	4.06E-24	Down
ELP1	ENSG00000070061	-1.206009022	5.27E-26	4.44E-24	Down
CLU	ENSG00000120885	-1.134107608	5.33E-26	4.47E-24	Down
NR4A3	ENSG00000119508	-1.449346277	5.40E-26	4.51E-24	Down
IER2	ENSG00000160888	1.001630208	6.47E-26	5.37E-24	Ups
ITPRID2	ENSG00000138434	-1.090124661	7.01E-26	5.79E-24	Down
SLC16A6	ENSG00000108932	-1.180522655	7.31E-26	6.00E-24	Down
MGA	ENSG00000174197	-1.55486422	7.52E-26	6.14E-24	Down
ARID5B	ENSG00000150347	-1.383544095	7.72E-26	6.28E-24	Down
ARHGEF12	ENSG00000196914	-1.212638688	8.33E-26	6.71E-24	Down
TUBA1A	ENSG00000167552	1.140791833	8.59E-26	6.85E-24	Ups
PDZD8	ENSG00000165650	-1.497275325	1.15E-25	9.08E-24	Down
JAK1	ENSG00000162434	-1.052256485	1.42E-25	1.11E-23	Down
ERCC1	ENSG00000012061	1.293381495	2.25E-25	1.74E-23	Ups
ARHGAP21	ENSG00000107863	-1.323019475	2.65E-25	2.02E-23	Down
NDUFA1	ENSG00000125356	1.052592234	2.97E-25	2.25E-23	Ups
SETX	ENSG00000107290	-1.376416486	4.07E-25	3.07E-23	Down
MIR4435-2HG	ENSG00000172965	1.16540593	4.19E-25	3.15E-23	Ups
SYNE1	ENSG00000131018	-1.906092921	4.51E-25	3.34E-23	Down
EXO1	ENSG00000174371	-1.112179902	4.51E-25	3.34E-23	Down
PDE4D	ENSG00000113448	-1.059715966	4.82E-25	3.56E-23	Down
MAN1A2	ENSG00000198162	-1.482995475	4.91E-25	3.61E-23	Down
DUSP2	ENSG00000158050	1.146263145	5.13E-25	3.73E-23	Ups
ITPR2	ENSG00000123104	-1.981507895	7.49E-25	5.43E-23	Down
AKR1C2	ENSG00000151632	1.861990693	8.36E-25	6.03E-23	Ups
TRRAP	ENSG00000196367	-1.03056117	1.16E-24	8.32E-23	Down
ZMPSTE24	ENSG00000084073	-1.191781539	1.45E-24	1.03E-22	Down
UTRN	ENSG00000152818	-1.850611141	1.45E-24	1.03E-22	Down
TSHZ2	ENSG00000182463	-1.375917806	1.56E-24	1.10E-22	Down
KAT6A	ENSG00000083168	-1.173039934	2.12E-24	1.49E-22	Down
SRGAP1	ENSG00000196935	-1.206028289	2.17E-24	1.52E-22	Down
SMC5	ENSG00000198887	-1.233719316	2.51E-24	1.75E-22	Down
LMAN1	ENSG00000074695	-1.285308562	2.99E-24	2.06E-22	Down
JAG1	ENSG00000101384	-1.213263636	3.01E-24	2.07E-22	Down
THBS1	ENSG00000137801	-1.857123467	5.27E-24	3.56E-22	Down
USP34	ENSG00000115464	-1.483042541	5.87E-24	3.95E-22	Down
BPNT2	ENSG00000104331	-1.151132096	6.75E-24	4.50E-22	Down
CSRP2	ENSG00000175183	1.017954933	7.16E-24	4.76E-22	Ups
ADAM12	ENSG00000148848	-1.674890258	7.46E-24	4.91E-22	Down
CEP350	ENSG00000135837	-1.675984643	7.61E-24	4.99E-22	Down
SVEP1	ENSG00000165124	-1.900791802	8.91E-24	5.82E-22	Down
NCOR1	ENSG00000141027	-1.045442048	9.62E-24	6.21E-22	Down
SFMBT2	ENSG00000198879	-1.121591728	9.71E-24	6.25E-22	Down
PFKFB2	ENSG00000123836	-1.143018539	1.14E-23	7.29E-22	Down
UBR5	ENSG00000104517	-1.132891154	1.16E-23	7.38E-22	Down
SETD2	ENSG00000181555	-1.062829542	1.34E-23	8.39E-22	Down
NQO1	ENSG00000181019	1.11938742	1.39E-23	8.67E-22	Ups
MED14	ENSG00000180182	-1.08669474	1.70E-23	1.06E-21	Down
ZNF106	ENSG00000103994	-1.309110267	1.73E-23	1.07E-21	Down
TANC1	ENSG00000115183	-1.224258756	1.98E-23	1.21E-21	Down
ADAMTS1	ENSG00000154734	-1.500583055	2.75E-23	1.68E-21	Down
KIF5B	ENSG00000170759	-1.159248449	3.00E-23	1.83E-21	Down
DAG1	ENSG00000173402	-1.078625334	3.10E-23	1.87E-21	Down
MSH6	ENSG00000116062	-1.101174554	3.22E-23	1.94E-21	Down
LANCL1	ENSG00000115365	-1.02482393	3.39E-23	2.04E-21	Down
CLASP1	ENSG00000074054	-1.147528639	3.45E-23	2.06E-21	Down
ANKRD17	ENSG00000132466	-1.227520213	5.33E-23	3.15E-21	Down
CDK5RAP2	ENSG00000136861	-1.003894402	5.53E-23	3.26E-21	Down
STS	ENSG00000101846	-1.566868177	6.70E-23	3.93E-21	Down
BPTF	ENSG00000171634	-1.205327693	7.24E-23	4.23E-21	Down
STAG1	ENSG00000118007	-1.23229233	7.29E-23	4.24E-21	Down
HACD2	ENSG00000206527	-1.096051853	7.35E-23	4.26E-21	Down
DDX46	ENSG00000145833	-1.178263525	7.69E-23	4.45E-21	Down
IER3	ENSG00000137331	1.038503924	9.03E-23	5.20E-21	Ups
ARFGEF2	ENSG00000124198	-1.255771777	9.19E-23	5.27E-21	Down
XPOT	ENSG00000184575	-1.190596445	9.68E-23	5.53E-21	Down
MARF1	ENSG00000166783	-1.289281534	1.10E-22	6.26E-21	Down
SMC3	ENSG00000108055	-1.212507303	1.30E-22	7.41E-21	Down
ATP13A3	ENSG00000133657	-1.181875682	1.32E-22	7.45E-21	Down
MAP3K2	ENSG00000169967	-1.23232763	1.42E-22	7.98E-21	Down
ACSF2	ENSG00000167107	1.119873839	1.64E-22	9.22E-21	Ups
TENT5A	ENSG00000112773	-1.590240753	1.71E-22	9.56E-21	Down
BBX	ENSG00000114439	-1.37229702	1.89E-22	1.05E-20	Down
EPRS1	ENSG00000136628	-1.151153336	2.31E-22	1.28E-20	Down
SEC31A	ENSG00000138674	-1.058235754	2.35E-22	1.30E-20	Down
COL12A1	ENSG00000111799	-2.685419597	2.36E-22	1.30E-20	Down
AHCTF1	ENSG00000153207	-1.406113405	2.67E-22	1.46E-20	Down
SLC31A1	ENSG00000136868	-1.114309118	2.86E-22	1.56E-20	Down
B9D1	ENSG00000108641	1.185077177	3.02E-22	1.64E-20	Ups
SELENOI	ENSG00000138018	-1.372861508	3.17E-22	1.71E-20	Down
ZZEF1	ENSG00000074755	-1.062079573	3.22E-22	1.73E-20	Down
CHD7	ENSG00000171316	-1.111407481	3.57E-22	1.91E-20	Down
CCNP	ENSG00000105219	2.868880132	3.74E-22	1.99E-20	Ups
MT1E	ENSG00000169715	1.509893483	4.25E-22	2.25E-20	Ups
IL6ST	ENSG00000134352	-1.632845061	5.19E-22	2.74E-20	Down
NME1	ENSG00000239672	1.022960625	5.64E-22	2.96E-20	Ups
SDF2L1	ENSG00000128228	1.19425592	5.90E-22	3.08E-20	Ups
SWAP70	ENSG00000133789	-1.218481493	6.23E-22	3.24E-20	Down
UTP20	ENSG00000120800	-1.630748337	6.95E-22	3.60E-20	Down
COL5A3	ENSG00000080573	-1.540973643	7.83E-22	4.03E-20	Down
YEATS2	ENSG00000163872	-1.108167311	8.25E-22	4.24E-20	Down
KIF1B	ENSG00000054523	-1.070180853	8.51E-22	4.35E-20	Down
TASOR2	ENSG00000108021	-1.441623247	8.74E-22	4.46E-20	Down
ROCK2	ENSG00000134318	-1.364515552	9.38E-22	4.77E-20	Down
HEG1	ENSG00000173706	-1.519720523	9.49E-22	4.81E-20	Down
CHD1	ENSG00000153922	-1.327527498	9.55E-22	4.82E-20	Down
CLIP1	ENSG00000130779	-1.192508668	1.04E-21	5.24E-20	Down
P4HA1	ENSG00000122884	-1.216079415	1.06E-21	5.32E-20	Down
DNAJC10	ENSG00000077232	-1.149746344	1.39E-21	6.88E-20	Down
ERC1	ENSG00000082805	-1.106413499	1.88E-21	9.28E-20	Down
RECQL	ENSG00000004700	-1.25337771	1.99E-21	9.80E-20	Down
TNFAIP3	ENSG00000118503	-1.305507363	2.45E-21	1.19E-19	Down
CDC42BPA	ENSG00000143776	-1.338981769	2.46E-21	1.19E-19	Down
ATAD2	ENSG00000156802	-1.184633422	3.40E-21	1.64E-19	Down
SLTM	ENSG00000137776	-1.092124577	3.53E-21	1.69E-19	Down
ZFR	ENSG00000056097	-1.142422009	3.65E-21	1.74E-19	Down
RO60	ENSG00000116747	-1.28722482	3.77E-21	1.80E-19	Down
CALD1	ENSG00000122786	-1.054460859	4.08E-21	1.93E-19	Down
MED13L	ENSG00000123066	-1.047387957	4.95E-21	2.33E-19	Down
LRPPRC	ENSG00000138095	-1.035442483	5.45E-21	2.55E-19	Down
CEP250	ENSG00000126001	-1.0632305	5.51E-21	2.57E-19	Down
NEMP1	ENSG00000166881	-1.129162008	7.06E-21	3.27E-19	Down
EP300	ENSG00000100393	-1.160872333	8.70E-21	3.99E-19	Down
USP47	ENSG00000170242	-1.122363595	1.56E-20	6.93E-19	Down
NUP153	ENSG00000124789	-1.050159797	1.61E-20	7.13E-19	Down
GLRX	ENSG00000173221	1.227410224	1.90E-20	8.36E-19	Ups
NF1	ENSG00000196712	-1.212732385	2.19E-20	9.60E-19	Down
DBT	ENSG00000137992	-1.371982138	2.24E-20	9.76E-19	Down
RDX	ENSG00000137710	-1.007493382	2.42E-20	1.05E-18	Down
CCDC93	ENSG00000125633	-1.082168856	2.96E-20	1.28E-18	Down
UBE3A	ENSG00000114062	-1.148970027	3.28E-20	1.41E-18	Down
PTPRG	ENSG00000144724	-1.919842044	3.34E-20	1.44E-18	Down
PXMP2	ENSG00000176894	1.264144349	4.20E-20	1.78E-18	Ups
SEMA5A	ENSG00000112902	-1.573163757	4.35E-20	1.83E-18	Down
TTC3	ENSG00000182670	-1.173960409	4.74E-20	1.98E-18	Down
MECOM	ENSG00000085276	-1.675471858	4.86E-20	2.03E-18	Down
TJP1	ENSG00000104067	-1.407668294	4.89E-20	2.04E-18	Down
ICE1	ENSG00000164151	-1.240809749	5.02E-20	2.07E-18	Down
RPS6KA3	ENSG00000177189	-1.139014571	5.34E-20	2.19E-18	Down
MDN1	ENSG00000112159	-1.283459163	5.51E-20	2.26E-18	Down
AP3B1	ENSG00000132842	-1.161011143	7.45E-20	3.01E-18	Down
ALDH3A1	ENSG00000108602	1.343768593	8.50E-20	3.42E-18	Ups
NCOA3	ENSG00000124151	-1.058644054	8.91E-20	3.56E-18	Down
PCNX1	ENSG00000100731	-1.394652229	9.16E-20	3.65E-18	Down
H2BC21	ENSG00000184678	1.290685996	1.19E-19	4.74E-18	Ups
MEGF9	ENSG00000106780	-1.264861959	1.22E-19	4.81E-18	Down
HELZ	ENSG00000198265	-1.28622215	1.22E-19	4.82E-18	Down
SLC6A9	ENSG00000196517	-1.082998245	1.25E-19	4.92E-18	Down
ADAMTS5	ENSG00000154736	-1.622358433	1.39E-19	5.45E-18	Down
DDX6	ENSG00000110367	-1.04731893	1.41E-19	5.52E-18	Down
LNPEP	ENSG00000113441	-1.631291354	1.53E-19	5.96E-18	Down
AKAP13	ENSG00000170776	-1.205505399	1.54E-19	5.97E-18	Down
SLC12A2	ENSG00000064651	-1.94766774	1.66E-19	6.44E-18	Down
NRP1	ENSG00000099250	-1.392065832	1.72E-19	6.65E-18	Down
ARHGAP32	ENSG00000134909	-1.435724097	1.90E-19	7.29E-18	Down
ATP2C1	ENSG00000017260	-1.058176155	1.94E-19	7.44E-18	Down
CLSPN	ENSG00000092853	-1.452115793	2.06E-19	7.83E-18	Down
MIA3	ENSG00000154305	-1.395643458	2.14E-19	8.14E-18	Down
LCOR	ENSG00000196233	-1.39310923	2.30E-19	8.66E-18	Down
WAPL	ENSG00000062650	-1.133425544	2.78E-19	1.04E-17	Down
NCBP2AS2	ENSG00000270170	1.023144014	2.91E-19	1.09E-17	Ups
NFATC2	ENSG00000101096	-1.881138798	3.14E-19	1.17E-17	Down
USP32	ENSG00000170832	-1.348502623	3.62E-19	1.34E-17	Down
TAB3	ENSG00000157625	-1.22707681	3.96E-19	1.46E-17	Down
XYLT1	ENSG00000103489	-1.209199153	4.32E-19	1.58E-17	Down
ZFX	ENSG00000005889	-1.344157414	4.42E-19	1.61E-17	Down
ALMS1	ENSG00000116127	-1.693454001	6.08E-19	2.20E-17	Down
NNT-AS1	ENSG00000248092	-1.040340636	6.88E-19	2.49E-17	Down
C5orf51	ENSG00000205765	-1.075833333	7.36E-19	2.65E-17	Down
TAF1	ENSG00000147133	-1.209473338	7.99E-19	2.87E-17	Down
E2F7	ENSG00000165891	-1.089321167	8.32E-19	2.98E-17	Down
GALNT1	ENSG00000141429	-1.069109258	1.06E-18	3.73E-17	Down
DNAJC3	ENSG00000102580	-1.437619224	1.15E-18	4.05E-17	Down
GADD45A	ENSG00000116717	1.151777988	1.16E-18	4.08E-17	Ups
SPTLC2	ENSG00000100596	-1.29382288	1.63E-18	5.69E-17	Down
DHX36	ENSG00000174953	-1.084004135	1.72E-18	5.96E-17	Down
CHD8	ENSG00000100888	-1.012996237	2.16E-18	7.42E-17	Down
ERO1A	ENSG00000197930	-1.034079939	2.64E-18	8.99E-17	Down
TNKS	ENSG00000173273	-1.153845441	2.68E-18	9.09E-17	Down
HMGCR	ENSG00000113161	-1.224105815	2.72E-18	9.20E-17	Down
LARP4	ENSG00000161813	-1.076961638	2.79E-18	9.42E-17	Down
SEPTIN11	ENSG00000138758	-1.119105671	3.53E-18	1.18E-16	Down
PKIG	ENSG00000168734	1.709402186	3.54E-18	1.19E-16	Ups
PRKD3	ENSG00000115825	-1.186592611	3.67E-18	1.23E-16	Down
PLOD2	ENSG00000152952	-1.617930218	3.85E-18	1.29E-16	Down
TNRC6A	ENSG00000090905	-1.05857027	4.28E-18	1.42E-16	Down
PPP6R3	ENSG00000110075	-1.058777478	4.38E-18	1.46E-16	Down
NR4A2	ENSG00000153234	-1.099978148	5.50E-18	1.81E-16	Down
ERBIN	ENSG00000112851	-1.20337788	5.86E-18	1.93E-16	Down
HEATR1	ENSG00000119285	-1.276976754	7.01E-18	2.29E-16	Down
PCM1	ENSG00000078674	-1.395643877	8.59E-18	2.76E-16	Down
MED13	ENSG00000108510	-1.367633177	9.81E-18	3.14E-16	Down
NFAT5	ENSG00000102908	-1.239793634	1.06E-17	3.39E-16	Down
RASSF8	ENSG00000123094	-1.170117178	1.28E-17	4.05E-16	Down
NUP50	ENSG00000093000	-1.114958084	1.31E-17	4.11E-16	Down
USP6NL	ENSG00000148429	-1.272345939	1.36E-17	4.27E-16	Down
COPZ2	ENSG00000005243	1.392940535	1.47E-17	4.61E-16	Ups
PGGHG	ENSG00000142102	1.496878522	1.88E-17	5.83E-16	Ups
SENP1	ENSG00000079387	-1.086565251	1.88E-17	5.83E-16	Down
LRP6	ENSG00000070018	-1.337481545	1.95E-17	6.01E-16	Down
BRCA1	ENSG00000012048	-1.118586385	2.05E-17	6.29E-16	Down
PHC3	ENSG00000173889	-1.161233786	2.21E-17	6.79E-16	Down
SLC39A6	ENSG00000141424	-1.233387015	2.41E-17	7.34E-16	Down
PATJ	ENSG00000132849	-1.141243807	2.55E-17	7.74E-16	Down
RIOK3	ENSG00000101782	-1.129172678	2.62E-17	7.96E-16	Down
SBNO1	ENSG00000139697	-1.283687591	2.74E-17	8.29E-16	Down
SLC9A6	ENSG00000198689	-1.323898441	2.79E-17	8.41E-16	Down
POLA1	ENSG00000101868	-1.22731544	3.03E-17	9.10E-16	Down
ENGASE	ENSG00000167280	1.116922765	3.21E-17	9.56E-16	Ups
SLK	ENSG00000065613	-1.027642028	3.31E-17	9.82E-16	Down
ZBED3	ENSG00000132846	-1.053666315	3.68E-17	1.08E-15	Down
DST	ENSG00000151914	-1.507866296	3.75E-17	1.10E-15	Down
PPP2R1B	ENSG00000137713	-1.04837548	3.88E-17	1.14E-15	Down
SLC26A2	ENSG00000155850	-1.505583937	3.96E-17	1.16E-15	Down
CA11	ENSG00000063180	1.453870911	4.17E-17	1.21E-15	Ups
BDP1	ENSG00000145734	-1.600667314	4.21E-17	1.22E-15	Down
WWC2	ENSG00000151718	-1.335982369	5.82E-17	1.67E-15	Down
SERINC5	ENSG00000164300	-1.065011712	5.90E-17	1.69E-15	Down
AKAP11	ENSG00000023516	-1.5741296	7.02E-17	2.00E-15	Down
KMT2E	ENSG00000005483	-1.077190848	7.51E-17	2.14E-15	Down
DSC2	ENSG00000134755	-1.644326237	9.03E-17	2.56E-15	Down
LRBA	ENSG00000198589	-1.593735524	9.31E-17	2.64E-15	Down
ALDH1L2	ENSG00000136010	-1.560365646	1.02E-16	2.87E-15	Down
KIF2A	ENSG00000068796	-1.146553867	1.02E-16	2.87E-15	Down
BMPR2	ENSG00000204217	-1.493214407	1.04E-16	2.93E-15	Down
MOB3B	ENSG00000120162	-1.012667021	1.15E-16	3.22E-15	Down
TNKS2	ENSG00000107854	-1.132953646	1.17E-16	3.27E-15	Down
MGAT4A	ENSG00000071073	-1.392187317	1.22E-16	3.41E-15	Down
TCF12	ENSG00000140262	-1.104613751	1.28E-16	3.53E-15	Down
OAS1	ENSG00000089127	1.127710041	1.36E-16	3.76E-15	Ups
TMEM209	ENSG00000146842	-1.043895966	1.42E-16	3.92E-15	Down
ANKIB1	ENSG00000001629	-1.091510381	1.44E-16	3.97E-15	Down
RNF13	ENSG00000082996	-1.053440824	1.64E-16	4.50E-15	Down
HSD17B8	ENSG00000204228	1.14829925	1.79E-16	4.89E-15	Ups
FAHD2B	ENSG00000144199	1.017949053	1.80E-16	4.91E-15	Ups
NR3C1	ENSG00000113580	-1.065601333	1.87E-16	5.09E-15	Down
HERC1	ENSG00000103657	-1.29929698	2.14E-16	5.81E-15	Down
TRIM33	ENSG00000197323	-1.134304368	2.15E-16	5.82E-15	Down
GNA13	ENSG00000120063	-1.037903186	2.16E-16	5.82E-15	Down
EGFR	ENSG00000146648	-1.542180024	2.16E-16	5.82E-15	Down
VASH2	ENSG00000143494	-1.399110443	2.35E-16	6.33E-15	Down
TMX3	ENSG00000166479	-1.352117916	2.49E-16	6.64E-15	Down
USP24	ENSG00000162402	-1.072293523	2.70E-16	7.17E-15	Down
CPLANE1	ENSG00000197603	-1.488731034	2.93E-16	7.73E-15	Down
USP8	ENSG00000138592	-1.174991312	2.97E-16	7.80E-15	Down
ZBTB1	ENSG00000126804	-1.032194816	3.42E-16	8.91E-15	Down
SMAD5	ENSG00000113658	-1.042423565	3.57E-16	9.28E-15	Down
CAMSAP2	ENSG00000118200	-1.068207033	3.96E-16	1.02E-14	Down
PLCL2	ENSG00000154822	-1.314306613	4.25E-16	1.09E-14	Down
CUL4B	ENSG00000158290	-1.129655436	4.65E-16	1.19E-14	Down
ATF7IP	ENSG00000171681	-1.280598176	4.73E-16	1.20E-14	Down
TTC17	ENSG00000052841	-1.167022204	4.75E-16	1.21E-14	Down
TRPM7	ENSG00000092439	-1.246138578	4.76E-16	1.21E-14	Down
ZC3H13	ENSG00000123200	-1.201899289	4.79E-16	1.21E-14	Down
KLF12	ENSG00000118922	-1.365099539	4.88E-16	1.23E-14	Down
RIF1	ENSG00000080345	-1.326180136	5.75E-16	1.45E-14	Down
IREB2	ENSG00000136381	-1.161679988	5.88E-16	1.48E-14	Down
MYCBP2	ENSG00000005810	-1.500981873	5.91E-16	1.48E-14	Down
ARSB	ENSG00000113273	-1.196334836	5.92E-16	1.48E-14	Down
ADAM10	ENSG00000137845	-1.29269057	6.11E-16	1.52E-14	Down
MPP5	ENSG00000072415	-1.147850404	8.16E-16	2.01E-14	Down
SBF2	ENSG00000133812	-1.077100804	8.40E-16	2.06E-14	Down
MAML3	ENSG00000196782	-1.222783866	9.09E-16	2.21E-14	Down
ID1	ENSG00000125968	1.041839732	9.30E-16	2.26E-14	Ups
TMEM106B	ENSG00000106460	-1.073223132	1.10E-15	2.67E-14	Down
GDAP1	ENSG00000104381	-1.599225021	1.29E-15	3.12E-14	Down
PALLD	ENSG00000129116	-1.10139964	1.38E-15	3.32E-14	Down
MTX3	ENSG00000177034	-1.232280988	1.52E-15	3.60E-14	Down
API5	ENSG00000166181	-1.093334511	1.58E-15	3.72E-14	Down
DIAPH3	ENSG00000139734	-1.082371718	1.61E-15	3.78E-14	Down
PANK3	ENSG00000120137	-1.200423933	1.67E-15	3.91E-14	Down
SLC12A6	ENSG00000140199	-1.371369738	1.71E-15	4.01E-14	Down
HOOK3	ENSG00000168172	-1.297823948	1.73E-15	4.04E-14	Down
HES7	ENSG00000179111	1.16986988	2.05E-15	4.73E-14	Ups
MACO1	ENSG00000204178	-1.275084897	2.10E-15	4.84E-14	Down
RLIM	ENSG00000131263	-1.07817702	2.24E-15	5.15E-14	Down
ACVR2B	ENSG00000114739	-1.210733317	2.38E-15	5.45E-14	Down
RAPGEF2	ENSG00000109756	-1.364533415	2.52E-15	5.76E-14	Down
CCNT1	ENSG00000129315	-1.040051629	2.60E-15	5.93E-14	Down
IFT46	ENSG00000118096	2.290875755	2.63E-15	5.98E-14	Ups
FAM13B	ENSG00000031003	-1.409780323	2.65E-15	6.02E-14	Down
ASCC3	ENSG00000112249	-1.446055707	2.86E-15	6.48E-14	Down
SOS1	ENSG00000115904	-1.165442938	2.97E-15	6.72E-14	Down
HSPA4L	ENSG00000164070	-1.432304384	2.99E-15	6.77E-14	Down
BIRC6	ENSG00000115760	-1.500337494	3.11E-15	7.02E-14	Down
NDUFB3	ENSG00000119013	1.092108709	3.43E-15	7.68E-14	Ups
PTPRD	ENSG00000153707	-2.293220355	3.57E-15	7.98E-14	Down
CSGALNACT1	ENSG00000147408	-1.045339666	3.68E-15	8.21E-14	Down
SMARCA5	ENSG00000153147	-1.076083723	3.71E-15	8.27E-14	Down
DICER1	ENSG00000100697	-1.346000287	3.84E-15	8.51E-14	Down
MITF	ENSG00000187098	-1.147479768	4.13E-15	9.12E-14	Down
CRISPLD2	ENSG00000103196	-1.415262218	4.45E-15	9.79E-14	Down
HELLS	ENSG00000119969	-1.085126399	4.52E-15	9.92E-14	Down
DDI2	ENSG00000197312	-1.305574217	5.11E-15	1.11E-13	Down
SERINC1	ENSG00000111897	-1.270013314	5.69E-15	1.22E-13	Down
PPP1R12A	ENSG00000058272	-1.117209015	6.21E-15	1.32E-13	Down
PIK3C2A	ENSG00000011405	-1.215514344	7.67E-15	1.62E-13	Down
AKAP9	ENSG00000127914	-1.423331491	7.83E-15	1.65E-13	Down
MID1	ENSG00000101871	-1.033620468	8.00E-15	1.68E-13	Down
PHLDB2	ENSG00000144824	-1.150258131	8.80E-15	1.83E-13	Down
PSME4	ENSG00000068878	-1.176605639	9.24E-15	1.91E-13	Down
ZBTB38	ENSG00000177311	-1.111827019	9.85E-15	2.03E-13	Down
AAMDC	ENSG00000087884	1.432262491	9.88E-15	2.03E-13	Ups
COL4A1	ENSG00000187498	-1.496867291	1.04E-14	2.12E-13	Down
MAN1A1	ENSG00000111885	-1.212587889	1.05E-14	2.13E-13	Down
MBNL1	ENSG00000152601	-1.015514312	1.06E-14	2.16E-13	Down
PIEZO2	ENSG00000154864	-1.703176132	1.22E-14	2.46E-13	Down
AC016717.2	ENSG00000273301	-1.23161371	1.52E-14	3.01E-13	Down
LAMP2	ENSG00000005893	-1.04238386	1.76E-14	3.48E-13	Down
KIAA1109	ENSG00000138688	-1.651172892	1.82E-14	3.58E-13	Down
NOXA1	ENSG00000188747	1.178895353	2.01E-14	3.94E-13	Ups
MXD3	ENSG00000213347	1.071293767	2.23E-14	4.35E-13	Ups
EIF2AK3	ENSG00000172071	-1.454285486	2.29E-14	4.47E-13	Down
ITGB8	ENSG00000105855	-1.324480915	2.35E-14	4.58E-13	Down
CTTNBP2NL	ENSG00000143079	-1.129237503	2.48E-14	4.83E-13	Down
SV2B	ENSG00000185518	-1.361365368	2.53E-14	4.89E-13	Down
SMC2	ENSG00000136824	-1.066415814	2.56E-14	4.92E-13	Down
SENP6	ENSG00000112701	-1.039366581	2.88E-14	5.47E-13	Down
NFIB	ENSG00000147862	-1.221740702	3.03E-14	5.75E-13	Down
ACBD5	ENSG00000107897	-1.097358664	3.21E-14	6.08E-13	Down
MYO5C	ENSG00000128833	-1.215899409	3.33E-14	6.29E-13	Down
GSDME	ENSG00000105928	1.079605217	4.22E-14	7.92E-13	Ups
DIS3	ENSG00000083520	-1.038702562	4.33E-14	8.11E-13	Down
STIL	ENSG00000123473	-1.261412963	4.69E-14	8.72E-13	Down
MIRLET7BHG	ENSG00000197182	1.229493663	4.88E-14	9.04E-13	Ups
SNRK	ENSG00000163788	-1.208148666	4.95E-14	9.16E-13	Down
GOLM2	ENSG00000166734	-1.019852987	5.00E-14	9.24E-13	Down
ITGA1	ENSG00000213949	-1.891641516	5.90E-14	1.08E-12	Down
CCPG1	ENSG00000260916	-1.478530167	6.46E-14	1.17E-12	Down
NCOA2	ENSG00000140396	-1.224237744	6.83E-14	1.24E-12	Down
HDDC3	ENSG00000184508	1.347933228	8.15E-14	1.46E-12	Ups
SPRY2	ENSG00000136158	1.114985076	8.77E-14	1.57E-12	Ups
ADAM17	ENSG00000151694	-1.413408743	8.78E-14	1.57E-12	Down
DSC3	ENSG00000134762	-1.658304562	8.85E-14	1.58E-12	Down
GPD2	ENSG00000115159	-1.228371593	8.86E-14	1.58E-12	Down
GCC2	ENSG00000135968	-1.191481736	8.88E-14	1.58E-12	Down
FOXP1	ENSG00000114861	-1.244711342	8.96E-14	1.59E-12	Down
BICC1	ENSG00000122870	-1.128041528	9.85E-14	1.75E-12	Down
GXYLT1	ENSG00000151233	-1.441251036	9.92E-14	1.76E-12	Down
ZNF770	ENSG00000198146	-1.282566166	1.10E-13	1.94E-12	Down
NCEH1	ENSG00000144959	-1.136073422	1.10E-13	1.94E-12	Down
CDH13	ENSG00000140945	-1.170838725	1.22E-13	2.14E-12	Down
MMP24	ENSG00000125966	-1.134422046	1.27E-13	2.22E-12	Down
ASXL2	ENSG00000143970	-1.026728209	1.30E-13	2.27E-12	Down
ITGB1	ENSG00000150093	-1.487016609	1.31E-13	2.28E-12	Down
SPECC1L	ENSG00000100014	-1.203353335	1.45E-13	2.52E-12	Down
XIAP	ENSG00000101966	-1.015134119	1.49E-13	2.58E-12	Down
MRTFB	ENSG00000186260	-1.255360868	1.61E-13	2.77E-12	Down
UBE4A	ENSG00000110344	-1.34395633	1.61E-13	2.77E-12	Down
SENP5	ENSG00000119231	-1.058276094	1.62E-13	2.79E-12	Down
LINC00294	ENSG00000280798	-1.105186499	1.71E-13	2.93E-12	Down
CELF2	ENSG00000048740	-1.431954731	1.73E-13	2.97E-12	Down
SLC7A2	ENSG00000003989	-1.016652009	1.75E-13	2.99E-12	Down
CXADR	ENSG00000154639	-1.374373262	1.94E-13	3.30E-12	Down
BCS1L	ENSG00000074582	1.116600716	2.44E-13	4.09E-12	Ups
FAM160A1	ENSG00000164142	-1.130910087	2.50E-13	4.18E-12	Down
NAA25	ENSG00000111300	-1.092011057	2.58E-13	4.31E-12	Down
CSGALNACT2	ENSG00000169826	-1.083211501	2.93E-13	4.86E-12	Down
JMJD1C	ENSG00000171988	-1.342703618	2.98E-13	4.94E-12	Down
EEA1	ENSG00000102189	-1.277401006	3.25E-13	5.36E-12	Down
ZC3H12D	ENSG00000178199	1.464535676	3.36E-13	5.53E-12	Ups
PHLPP2	ENSG00000040199	-1.131587873	3.70E-13	6.04E-12	Down
CENPE	ENSG00000138778	-1.257205243	3.91E-13	6.38E-12	Down
KCNJ18	ENSG00000260458	-1.017801909	3.94E-13	6.41E-12	Down
USF3	ENSG00000176542	-1.772896242	4.05E-13	6.55E-12	Down
TLL1	ENSG00000038295	-1.551246272	4.12E-13	6.63E-12	Down
STRN	ENSG00000115808	-1.199033329	4.25E-13	6.83E-12	Down
MAP7D3	ENSG00000129680	-1.173866719	4.58E-13	7.34E-12	Down
POGLUT3	ENSG00000178202	-1.162692737	4.86E-13	7.76E-12	Down
PHF14	ENSG00000106443	-1.023747003	5.53E-13	8.78E-12	Down
FAH	ENSG00000103876	1.451498105	7.74E-13	1.21E-11	Ups
KDM5A	ENSG00000073614	-1.208654292	8.26E-13	1.29E-11	Down
DTD1	ENSG00000125821	1.155656141	8.97E-13	1.39E-11	Ups
RABL3	ENSG00000144840	-1.230078898	9.63E-13	1.49E-11	Down
KLHL15	ENSG00000174010	-1.005121829	1.28E-12	1.94E-11	Down
TMTC3	ENSG00000139324	-1.378725507	1.31E-12	1.98E-11	Down
UHRF1BP1	ENSG00000065060	-1.106008102	1.33E-12	2.00E-11	Down
RFC1	ENSG00000035928	-1.037582078	1.33E-12	2.01E-11	Down
EIF4A1	ENSG00000161960	1.136193127	1.48E-12	2.21E-11	Ups
NOG	ENSG00000183691	1.064617466	1.59E-12	2.37E-11	Ups
OPA1	ENSG00000198836	-1.055678653	1.65E-12	2.46E-11	Down
CSNK1G1	ENSG00000169118	-1.043547283	1.69E-12	2.51E-11	Down
PTPRM	ENSG00000173482	-1.032116949	1.70E-12	2.51E-11	Down
BLOC1S6	ENSG00000104164	-1.036120111	1.77E-12	2.62E-11	Down
LAMA3	ENSG00000053747	-1.402415958	1.88E-12	2.77E-11	Down
SOCS4	ENSG00000180008	-1.156202319	2.14E-12	3.11E-11	Down
ROCK1	ENSG00000067900	-1.016752209	2.23E-12	3.24E-11	Down
SAMD8	ENSG00000156671	-1.053222976	2.38E-12	3.44E-11	Down
ARFGEF1	ENSG00000066777	-1.121203742	2.40E-12	3.46E-11	Down
TASOR	ENSG00000163946	-1.063245402	2.45E-12	3.54E-11	Down
SNHG30	ENSG00000267321	1.19612523	2.84E-12	4.08E-11	Ups
ATP11B	ENSG00000058063	-1.259001656	3.12E-12	4.46E-11	Down
PUM2	ENSG00000055917	-1.015022083	3.17E-12	4.53E-11	Down
EMSY	ENSG00000158636	-1.085820829	3.35E-12	4.76E-11	Down
CEP295	ENSG00000166004	-1.241422958	3.69E-12	5.19E-11	Down
ABCC4	ENSG00000125257	-1.173883562	3.93E-12	5.52E-11	Down
MKLN1	ENSG00000128585	-1.013077159	4.41E-12	6.15E-11	Down
PHIP	ENSG00000146247	-1.224457625	4.61E-12	6.40E-11	Down
SMCHD1	ENSG00000101596	-1.117872664	4.92E-12	6.80E-11	Down
LARP6	ENSG00000166173	1.029983283	5.06E-12	6.97E-11	Ups
ITGAV	ENSG00000138448	-1.411524502	5.07E-12	6.97E-11	Down
BRIP1	ENSG00000136492	-1.297619904	5.74E-12	7.85E-11	Down
PDE4DIP	ENSG00000178104	-1.215676764	5.82E-12	7.94E-11	Down
PRR14L	ENSG00000183530	-1.102874014	6.80E-12	9.21E-11	Down
GALNT7	ENSG00000109586	-1.462300408	6.85E-12	9.25E-11	Down
ZMYM4	ENSG00000146463	-1.057539175	6.87E-12	9.28E-11	Down
AC005261.1	ENSG00000268205	-1.357445901	7.66E-12	1.03E-10	Down
ZNF37A	ENSG00000075407	-1.269899384	8.29E-12	1.10E-10	Down
PEAK1	ENSG00000173517	-1.163768149	8.33E-12	1.11E-10	Down
BTBD7	ENSG00000011114	-1.00355898	8.59E-12	1.14E-10	Down
HIVEP1	ENSG00000095951	-1.101545102	9.45E-12	1.25E-10	Down
MANBA	ENSG00000109323	-1.035426146	9.88E-12	1.30E-10	Down
PHF3	ENSG00000118482	-1.246217498	1.01E-11	1.33E-10	Down
AC026336.3	ENSG00000276122	-1.278813494	1.05E-11	1.38E-10	Down
TSTD2	ENSG00000136925	-1.381292114	1.13E-11	1.48E-10	Down
MSX1	ENSG00000163132	1.131101732	1.15E-11	1.50E-10	Ups
HSPG2	ENSG00000142798	-1.48471381	1.16E-11	1.51E-10	Down
PKN2	ENSG00000065243	-1.002731303	1.21E-11	1.56E-10	Down
MCM10	ENSG00000065328	-1.026250354	1.53E-11	1.95E-10	Down
ATRX	ENSG00000085224	-1.11362726	1.68E-11	2.13E-10	Down
DENND4A	ENSG00000174485	-1.323375835	1.73E-11	2.19E-10	Down
MAMDC2	ENSG00000165072	-1.678241369	1.94E-11	2.45E-10	Down
KIAA0825	ENSG00000185261	-1.236181072	2.10E-11	2.63E-10	Down
USP37	ENSG00000135913	-1.481006358	2.30E-11	2.87E-10	Down
NAA15	ENSG00000164134	-1.007544772	2.34E-11	2.92E-10	Down
CCSER2	ENSG00000107771	-1.242959122	2.45E-11	3.04E-10	Down
DOCK9	ENSG00000088387	-1.046472299	2.62E-11	3.24E-10	Down
SLC16A7	ENSG00000118596	-1.362872391	2.85E-11	3.52E-10	Down
TSFM	ENSG00000123297	1.02104958	3.09E-11	3.79E-10	Ups
ARHGAP18	ENSG00000146376	-1.042026906	3.12E-11	3.83E-10	Down
ZDBF2	ENSG00000204186	-1.381233658	3.43E-11	4.17E-10	Down
FER	ENSG00000151422	-1.404963727	3.57E-11	4.33E-10	Down
ATF6	ENSG00000118217	-1.032189038	3.58E-11	4.34E-10	Down
SACS	ENSG00000151835	-1.051591158	3.66E-11	4.44E-10	Down
MBTPS2	ENSG00000012174	-1.064126213	3.78E-11	4.58E-10	Down
ITGA2	ENSG00000164171	-1.807174502	3.84E-11	4.65E-10	Down
LAMA1	ENSG00000101680	-1.669787903	3.96E-11	4.77E-10	Down
THAP5	ENSG00000177683	-1.036562188	3.96E-11	4.78E-10	Down
METTL27	ENSG00000165171	1.410160487	4.33E-11	5.18E-10	Ups
UPF2	ENSG00000151461	-1.262125152	4.35E-11	5.20E-10	Down
SLC7A11	ENSG00000151012	-1.401098384	4.74E-11	5.63E-10	Down
ACAP2	ENSG00000114331	-1.114767626	4.95E-11	5.87E-10	Down
UBXN8	ENSG00000104691	-1.283967545	6.16E-11	7.24E-10	Down
JUN	ENSG00000177606	1.400145107	6.27E-11	7.35E-10	Ups
VIPR1	ENSG00000114812	1.002329967	6.37E-11	7.44E-10	Ups
SLC47A1	ENSG00000142494	1.348861471	7.25E-11	8.41E-10	Ups
CASD1	ENSG00000127995	-1.205402665	7.41E-11	8.57E-10	Down
RIPK1	ENSG00000137275	-1.219473847	7.77E-11	8.94E-10	Down
LIN54	ENSG00000189308	-1.162542505	8.34E-11	9.56E-10	Down
MFAP3	ENSG00000037749	-1.187855832	8.37E-11	9.58E-10	Down
IBTK	ENSG00000005700	-1.16629948	9.20E-11	1.05E-09	Down
LCLAT1	ENSG00000172954	-1.140159039	9.74E-11	1.11E-09	Down
TBC1D5	ENSG00000131374	-1.01475275	1.01E-10	1.14E-09	Down
DGKH	ENSG00000102780	-1.341683539	1.03E-10	1.16E-09	Down
GLIS3	ENSG00000107249	-1.101727247	1.07E-10	1.21E-09	Down
GEN1	ENSG00000178295	-1.171286362	1.09E-10	1.23E-09	Down
CRYAB	ENSG00000109846	2.069580289	1.12E-10	1.26E-09	Ups
RABGAP1L	ENSG00000152061	-1.274339519	1.12E-10	1.26E-09	Down
AC006077.2	ENSG00000279799	2.137786857	1.16E-10	1.30E-09	Ups
PDS5B	ENSG00000083642	-1.262255432	1.23E-10	1.38E-09	Down
DERL3	ENSG00000099958	1.331544436	1.27E-10	1.42E-09	Ups
DNAJC13	ENSG00000138246	-1.042913165	1.31E-10	1.45E-09	Down
CBR3	ENSG00000159231	1.05618064	1.38E-10	1.53E-09	Ups
ALG10B	ENSG00000175548	-1.104847608	1.48E-10	1.63E-09	Down
ELMOD2	ENSG00000179387	-1.226137092	1.48E-10	1.63E-09	Down
UGGT2	ENSG00000102595	-1.116592336	1.56E-10	1.71E-09	Down
IDE	ENSG00000119912	-1.011996004	1.57E-10	1.71E-09	Down
ERAP1	ENSG00000164307	-1.573271495	1.60E-10	1.75E-09	Down
EYA3	ENSG00000158161	-1.065729378	1.72E-10	1.87E-09	Down
KIF14	ENSG00000118193	-1.177412704	1.81E-10	1.97E-09	Down
HIVEP2	ENSG00000010818	-1.316465823	1.84E-10	2.00E-09	Down
AC008124.1	ENSG00000273015	1.009555889	1.98E-10	2.13E-09	Ups
PIK3R4	ENSG00000196455	-1.111561514	2.10E-10	2.27E-09	Down
SLIT2	ENSG00000145147	-1.904257461	2.50E-10	2.66E-09	Down
SECISBP2L	ENSG00000138593	-1.189838247	2.72E-10	2.88E-09	Down
GPR3	ENSG00000181773	1.454067578	2.86E-10	3.02E-09	Ups
PYROXD1	ENSG00000121350	-1.071476284	3.07E-10	3.22E-09	Down
SETDB2	ENSG00000136169	-1.3246569	3.10E-10	3.25E-09	Down
FAM161B	ENSG00000156050	-1.519556813	3.16E-10	3.31E-09	Down
TTF1	ENSG00000125482	-1.009960863	3.44E-10	3.58E-09	Down
UBR4	ENSG00000127481	-1.339431847	4.01E-10	4.14E-09	Down
CCDC28B	ENSG00000160050	1.378920091	4.08E-10	4.20E-09	Ups
ACER3	ENSG00000078124	-1.215860487	4.47E-10	4.58E-09	Down
AC245140.2	ENSG00000280195	1.134563992	4.97E-10	5.07E-09	Ups
AC093001.1	ENSG00000244468	-2.30104846	5.03E-10	5.13E-09	Down
CTTNBP2	ENSG00000077063	-1.051968257	5.71E-10	5.78E-09	Down
SNORA73B	ENSG00000200087	1.842531126	5.72E-10	5.78E-09	Ups
REST	ENSG00000084093	-1.193626955	5.81E-10	5.86E-09	Down
TULP4	ENSG00000130338	-1.234755579	6.75E-10	6.74E-09	Down
SASH1	ENSG00000111961	-1.088079061	6.79E-10	6.77E-09	Down
FRYL	ENSG00000075539	-1.469461288	7.32E-10	7.27E-09	Down
RAB11FIP2	ENSG00000107560	-1.251776119	7.32E-10	7.27E-09	Down
FAM229B	ENSG00000203778	1.599872705	7.47E-10	7.41E-09	Ups
GPAM	ENSG00000119927	-1.458791121	7.60E-10	7.53E-09	Down
HPS5	ENSG00000110756	-1.057742944	7.79E-10	7.70E-09	Down
TMEM178B	ENSG00000261115	-1.329271368	7.98E-10	7.88E-09	Down
ATM	ENSG00000149311	-1.00260927	8.08E-10	7.96E-09	Down
UBXN2B	ENSG00000215114	-1.052055895	8.19E-10	8.06E-09	Down
PI3	ENSG00000124102	1.974451748	8.34E-10	8.20E-09	Ups
RC3H1	ENSG00000135870	-1.21329866	8.63E-10	8.47E-09	Down
IFI27L2	ENSG00000119632	1.719956039	9.12E-10	8.91E-09	Ups
LOXL1	ENSG00000129038	1.241535725	9.33E-10	9.10E-09	Ups
GPR180	ENSG00000152749	-1.043623422	9.56E-10	9.29E-09	Down
RETREG1	ENSG00000154153	-1.102631215	1.00E-09	9.70E-09	Down
VLDLR	ENSG00000147852	-1.519164724	1.14E-09	1.09E-08	Down
MMS22L	ENSG00000146263	-1.183609758	1.19E-09	1.14E-08	Down
GUF1	ENSG00000151806	-1.409388171	1.21E-09	1.16E-08	Down
INO80D	ENSG00000114933	-1.359577196	1.22E-09	1.17E-08	Down
TMEM37	ENSG00000171227	1.009936603	1.28E-09	1.22E-08	Ups
XPO4	ENSG00000132953	-1.023200778	1.42E-09	1.35E-08	Down
ATG2B	ENSG00000066739	-1.194406948	1.45E-09	1.37E-08	Down
PIKFYVE	ENSG00000115020	-1.239234108	1.45E-09	1.37E-08	Down
ETFDH	ENSG00000171503	-1.002719731	1.60E-09	1.49E-08	Down
SNHG14	ENSG00000224078	-1.03535959	1.64E-09	1.52E-08	Down
CD74	ENSG00000019582	-2.110503255	1.68E-09	1.56E-08	Down
TXNDC16	ENSG00000087301	-1.42305773	1.92E-09	1.77E-08	Down
CCP110	ENSG00000103540	-1.253578718	2.01E-09	1.84E-08	Down
WRN	ENSG00000165392	-1.063316629	2.04E-09	1.86E-08	Down
RLF	ENSG00000117000	-1.203128963	2.11E-09	1.93E-08	Down
TRAK2	ENSG00000115993	-1.247217734	2.14E-09	1.95E-08	Down
TUT7	ENSG00000083223	-1.118251312	2.17E-09	1.98E-08	Down
ZNF507	ENSG00000168813	-1.110619488	2.22E-09	2.02E-08	Down
AC010761.1	ENSG00000264577	1.190875524	2.24E-09	2.03E-08	Ups
PTPRK	ENSG00000152894	-1.072829429	2.25E-09	2.04E-08	Down
POU2F1	ENSG00000143190	-1.009535929	2.39E-09	2.16E-08	Down
TIMP4	ENSG00000157150	1.31227176	2.40E-09	2.17E-08	Ups
KIF16B	ENSG00000089177	-1.079364623	2.41E-09	2.17E-08	Down
KTN1	ENSG00000126777	-1.36317075	2.45E-09	2.21E-08	Down
LNPK	ENSG00000144320	-1.044472664	2.52E-09	2.27E-08	Down
AC245041.1	ENSG00000273760	-1.17785744	2.55E-09	2.29E-08	Down
MAP3K1	ENSG00000095015	-1.171584429	2.90E-09	2.58E-08	Down
MFSD2A	ENSG00000168389	2.07473981	3.01E-09	2.67E-08	Ups
SPTY2D1	ENSG00000179119	-1.085263585	3.02E-09	2.68E-08	Down
CYSRT1	ENSG00000197191	1.077842522	3.11E-09	2.75E-08	Ups
ONECUT2	ENSG00000119547	-1.0133117	3.20E-09	2.82E-08	Down
BMPR1A	ENSG00000107779	-1.021643727	3.22E-09	2.83E-08	Down
FKBP14	ENSG00000106080	-1.086378171	3.37E-09	2.96E-08	Down
BATF3	ENSG00000123685	1.514034176	3.40E-09	2.99E-08	Ups
XPR1	ENSG00000143324	-1.426933059	3.70E-09	3.23E-08	Down
MFSD3	ENSG00000167700	1.050575211	3.96E-09	3.43E-08	Ups
HAS2	ENSG00000170961	-1.656190644	3.98E-09	3.45E-08	Down
ASIC1	ENSG00000110881	1.753099908	4.03E-09	3.49E-08	Ups
JMY	ENSG00000152409	-1.079677854	4.04E-09	3.49E-08	Down
REV3L	ENSG00000009413	-1.335210579	4.72E-09	4.03E-08	Down
MTMR9LP	ENSG00000220785	1.029299257	4.79E-09	4.08E-08	Ups
TMEM87A	ENSG00000103978	-1.011545668	4.82E-09	4.10E-08	Down
STK38L	ENSG00000211455	-1.062498178	4.87E-09	4.15E-08	Down
STOX2	ENSG00000173320	-1.337160395	4.89E-09	4.16E-08	Down
SSBP2	ENSG00000145687	1.316176862	4.96E-09	4.21E-08	Ups
TTC13	ENSG00000143643	-1.008165371	5.06E-09	4.29E-08	Down
EGR1	ENSG00000120738	1.943902116	5.12E-09	4.34E-08	Ups
ZNF236	ENSG00000130856	-1.004985292	5.71E-09	4.80E-08	Down
ZKSCAN2	ENSG00000155592	-1.134318459	5.90E-09	4.95E-08	Down
UQCC3	ENSG00000204922	1.739678086	5.96E-09	4.99E-08	Ups
KIAA0895	ENSG00000164542	-1.192714301	6.16E-09	5.14E-08	Down
AL662797.1	ENSG00000272540	1.932980343	6.27E-09	5.23E-08	Ups
BRCC3	ENSG00000185515	-1.123266922	6.51E-09	5.39E-08	Down
GNG10	ENSG00000242616	1.139563553	6.57E-09	5.43E-08	Ups
ADGRG6	ENSG00000112414	-1.827737099	8.80E-09	7.14E-08	Down
VPS13C	ENSG00000129003	-1.256732198	8.90E-09	7.22E-08	Down
ENPP1	ENSG00000197594	-1.469415562	9.05E-09	7.34E-08	Down
CERS6	ENSG00000172292	-1.224361295	9.56E-09	7.74E-08	Down
GAD1	ENSG00000128683	1.171644299	9.90E-09	7.99E-08	Ups
NECTIN4	ENSG00000143217	1.591687099	1.04E-08	8.38E-08	Ups
ZBTB21	ENSG00000173276	-1.02085188	1.15E-08	9.14E-08	Down
SLC35D2	ENSG00000130958	1.238309636	1.19E-08	9.47E-08	Ups
LZTS3	ENSG00000088899	1.27196839	1.22E-08	9.66E-08	Ups
CHML	ENSG00000203668	-1.126025479	1.26E-08	9.95E-08	Down
GPATCH11	ENSG00000152133	-1.031265528	1.32E-08	1.04E-07	Down
ZNF510	ENSG00000081386	-1.15560822	1.34E-08	1.05E-07	Down
ATP2B1	ENSG00000070961	-1.402047993	1.39E-08	1.09E-07	Down
MTX1P1	ENSG00000236675	-1.125331575	1.51E-08	1.18E-07	Down
EDEM3	ENSG00000116406	-1.108747426	1.57E-08	1.22E-07	Down
CACNB2	ENSG00000165995	-1.661944277	1.65E-08	1.28E-07	Down
MICAL2	ENSG00000133816	1.191544903	1.66E-08	1.29E-07	Ups
BRCA2	ENSG00000139618	-1.396127708	1.72E-08	1.32E-07	Down
HSD17B12	ENSG00000149084	-1.045584622	1.74E-08	1.34E-07	Down
VPS13B	ENSG00000132549	-1.16216258	1.74E-08	1.34E-07	Down
TNRC6B	ENSG00000100354	-1.047515136	1.77E-08	1.36E-07	Down
DCBLD2	ENSG00000057019	-1.18954469	1.89E-08	1.44E-07	Down
BLM	ENSG00000197299	-1.025629389	1.99E-08	1.51E-07	Down
PIK3CA	ENSG00000121879	-1.133358773	2.06E-08	1.56E-07	Down
MYORG	ENSG00000164976	-1.125761559	2.12E-08	1.60E-07	Down
MYO9A	ENSG00000066933	-1.186510842	2.12E-08	1.61E-07	Down
ANKRD12	ENSG00000101745	-1.328440206	2.35E-08	1.76E-07	Down
RALGAPA2	ENSG00000188559	-1.388050512	2.52E-08	1.88E-07	Down
AL513304.1	ENSG00000233052	1.790392142	2.76E-08	2.04E-07	Ups
MBNL2	ENSG00000139793	-1.046617203	2.82E-08	2.08E-07	Down
TESC	ENSG00000088992	1.126378363	2.83E-08	2.09E-07	Ups
DOCK7	ENSG00000116641	-1.130298866	2.92E-08	2.15E-07	Down
PPARGC1A	ENSG00000109819	-1.127688811	3.11E-08	2.28E-07	Down
CXCL2	ENSG00000081041	1.893980121	3.13E-08	2.30E-07	Ups
AC022149.1	ENSG00000269378	-1.237871457	3.18E-08	2.32E-07	Down
AHI1	ENSG00000135541	-1.218548726	3.28E-08	2.40E-07	Down
UBR3	ENSG00000144357	-1.185215146	3.57E-08	2.60E-07	Down
GREB1	ENSG00000196208	-1.331546676	3.66E-08	2.66E-07	Down
LARP7	ENSG00000174720	-1.030728167	3.88E-08	2.80E-07	Down
TUBGCP5	ENSG00000275835	-1.165857392	3.91E-08	2.82E-07	Down
MOB1B	ENSG00000173542	-1.079285259	3.98E-08	2.87E-07	Down
DHX57	ENSG00000163214	-1.145013305	4.07E-08	2.92E-07	Down
GAN	ENSG00000261609	-1.086302394	4.08E-08	2.93E-07	Down
MSH3	ENSG00000113318	-1.013565265	4.90E-08	3.46E-07	Down
LMBRD2	ENSG00000164187	-1.147037991	4.90E-08	3.46E-07	Down
TET2	ENSG00000168769	-1.592243977	5.01E-08	3.53E-07	Down
NEXN	ENSG00000162614	-1.108576321	5.02E-08	3.54E-07	Down
EFR3A	ENSG00000132294	-1.037291022	5.19E-08	3.66E-07	Down
RHPN1	ENSG00000158106	1.292710951	5.24E-08	3.69E-07	Ups
BCAS4	ENSG00000124243	1.295102512	5.41E-08	3.80E-07	Ups
IFT80	ENSG00000068885	-1.071785781	5.62E-08	3.93E-07	Down
AP002360.1	ENSG00000255135	1.381437794	5.65E-08	3.95E-07	Ups
H2BC5	ENSG00000158373	1.216138122	5.87E-08	4.09E-07	Ups
PHACTR2	ENSG00000112419	-1.210530547	6.15E-08	4.27E-07	Down
DENND4C	ENSG00000137145	-1.325637726	6.85E-08	4.71E-07	Down
ERCC6L2	ENSG00000182150	-1.079754495	7.07E-08	4.85E-07	Down
CLASP2	ENSG00000163539	-1.031764086	7.13E-08	4.89E-07	Down
CLCN3	ENSG00000109572	-1.02550306	7.39E-08	5.06E-07	Down
TENM3	ENSG00000218336	-1.965658484	7.57E-08	5.16E-07	Down
CDH2	ENSG00000170558	-1.334302071	7.70E-08	5.24E-07	Down
LATS1	ENSG00000131023	-1.040957773	7.75E-08	5.27E-07	Down
ZC3H12C	ENSG00000149289	-1.182148883	7.83E-08	5.31E-07	Down
IFNGR1	ENSG00000027697	-1.061890254	8.18E-08	5.53E-07	Down
RYR2	ENSG00000198626	-1.626868751	8.36E-08	5.65E-07	Down
COA6-AS1	ENSG00000231663	1.405966757	8.57E-08	5.79E-07	Ups
CDH24	ENSG00000139880	1.092036745	8.57E-08	5.79E-07	Ups
SNORD3A	ENSG00000263934	1.271153253	9.04E-08	6.08E-07	Ups
ARHGAP42	ENSG00000165895	-1.05856904	1.01E-07	6.73E-07	Down
HAR1B	ENSG00000231133	1.026249128	1.02E-07	6.80E-07	Ups
MMP28	ENSG00000271447	1.142230395	1.29E-07	8.47E-07	Ups
ARID2	ENSG00000189079	-1.036837759	1.52E-07	9.86E-07	Down
LCA5	ENSG00000135338	-1.711574441	1.67E-07	1.08E-06	Down
MACROD1	ENSG00000133315	1.172719605	1.83E-07	1.17E-06	Ups
ATP7A	ENSG00000165240	-1.360462607	1.88E-07	1.20E-06	Down
AC110285.2	ENSG00000262877	1.062244865	1.89E-07	1.20E-06	Ups
SP4	ENSG00000105866	-1.2073573	2.09E-07	1.32E-06	Down
AAAS	ENSG00000094914	1.187189218	2.17E-07	1.36E-06	Ups
TBX2-AS1	ENSG00000267280	1.27745201	2.41E-07	1.50E-06	Ups
MAN2A1	ENSG00000112893	-1.045211596	2.48E-07	1.55E-06	Down
KITLG	ENSG00000049130	-1.064827777	2.59E-07	1.61E-06	Down
ODR4	ENSG00000157181	-1.077951012	2.62E-07	1.62E-06	Down
UBR1	ENSG00000159459	-1.276607433	2.85E-07	1.76E-06	Down
DZIP3	ENSG00000198919	-1.301822071	2.95E-07	1.81E-06	Down
FGD6	ENSG00000180263	-1.429470824	2.95E-07	1.81E-06	Down
APC	ENSG00000134982	-1.18567986	3.00E-07	1.84E-06	Down
TRPS1	ENSG00000104447	-1.343016971	3.08E-07	1.89E-06	Down
CEP162	ENSG00000135315	-1.213917669	3.12E-07	1.91E-06	Down
SPATA5	ENSG00000145375	-1.189738848	3.22E-07	1.96E-06	Down
ZNF45	ENSG00000124459	-1.032710979	3.28E-07	2.00E-06	Down
KRIT1	ENSG00000001631	-1.274120913	3.43E-07	2.08E-06	Down
NMRAL2P	ENSG00000171658	1.422392888	3.63E-07	2.19E-06	Ups
FUT8	ENSG00000033170	-1.107210232	3.90E-07	2.34E-06	Down
ZBTB10	ENSG00000205189	-1.026871597	4.02E-07	2.40E-06	Down
NPAT	ENSG00000149308	-1.038750722	4.07E-07	2.43E-06	Down
ATP2B4	ENSG00000058668	-1.22287518	4.15E-07	2.48E-06	Down
PIGA	ENSG00000165195	-1.067027166	4.34E-07	2.58E-06	Down
AL451069.3	ENSG00000234311	1.603002562	4.50E-07	2.67E-06	Ups
MT1X	ENSG00000187193	1.126320401	4.65E-07	2.76E-06	Ups
EPM2A	ENSG00000112425	-1.166122393	4.77E-07	2.82E-06	Down
SLC35A5	ENSG00000138459	-1.013177949	4.92E-07	2.91E-06	Down
HOXA-AS2	ENSG00000253552	1.022761453	5.14E-07	3.02E-06	Ups
DDIAS	ENSG00000165490	-1.227765747	5.25E-07	3.08E-06	Down
TFRC	ENSG00000072274	-1.38879114	5.52E-07	3.23E-06	Down
CASP8AP2	ENSG00000118412	-1.03335148	5.59E-07	3.27E-06	Down
TC2N	ENSG00000165929	-1.574511375	5.73E-07	3.35E-06	Down
MUC16	ENSG00000181143	-1.7341506	6.81E-07	3.92E-06	Down
R3HCC1L	ENSG00000166024	-1.173658586	7.32E-07	4.19E-06	Down
GS1-124K5.4	ENSG00000237310	1.348900991	7.47E-07	4.27E-06	Ups
BRWD3	ENSG00000165288	-1.269882739	7.89E-07	4.49E-06	Down
ARSD	ENSG00000006756	-1.111738027	8.28E-07	4.70E-06	Down
ZNF407	ENSG00000215421	-1.069382988	8.64E-07	4.89E-06	Down
FAM27B	ENSG00000278763	1.402761961	8.84E-07	4.99E-06	Ups
SP6	ENSG00000189120	1.302766066	9.25E-07	5.21E-06	Ups
KLF7	ENSG00000118263	-1.024652101	1.00E-06	5.62E-06	Down
KDM7A	ENSG00000006459	-1.068530217	1.02E-06	5.72E-06	Down
PARD3B	ENSG00000116117	-1.052682193	1.03E-06	5.74E-06	Down
KLRG2	ENSG00000188883	1.706420127	1.08E-06	6.00E-06	Ups
SMIM27	ENSG00000235453	1.294473611	1.18E-06	6.50E-06	Ups
OASL	ENSG00000135114	1.913389604	1.18E-06	6.52E-06	Ups
SHC2	ENSG00000129946	1.351094569	1.18E-06	6.52E-06	Ups
MYO7B	ENSG00000169994	1.175510569	1.19E-06	6.57E-06	Ups
FAM131C	ENSG00000185519	1.059755657	1.25E-06	6.86E-06	Ups
MLH3	ENSG00000119684	-1.018205838	1.28E-06	7.03E-06	Down
LRRC37A4P	ENSG00000214425	-1.04908073	1.30E-06	7.13E-06	Down
ADGRG2	ENSG00000173698	-1.34179466	1.35E-06	7.40E-06	Down
SLC25A5-AS1	ENSG00000224281	1.204025396	1.41E-06	7.67E-06	Ups
EPHX2	ENSG00000120915	1.07871548	1.45E-06	7.87E-06	Ups
CLDND2	ENSG00000160318	1.392040342	1.57E-06	8.47E-06	Ups
SMKR1	ENSG00000240204	1.639813775	1.57E-06	8.51E-06	Ups
ATAD5	ENSG00000176208	-1.018415535	1.58E-06	8.52E-06	Down
IKBKE	ENSG00000263528	1.393652648	1.58E-06	8.54E-06	Ups
ZNF761	ENSG00000160336	-1.072698668	1.59E-06	8.58E-06	Down
GP1BA	ENSG00000185245	1.157059814	1.60E-06	8.64E-06	Ups
OSBPL7	ENSG00000006025	1.16043931	1.61E-06	8.65E-06	Ups
ZNF286A	ENSG00000187607	-1.324179072	1.61E-06	8.66E-06	Down
AP001267.1	ENSG00000254873	-1.507394121	1.66E-06	8.95E-06	Down
ENOX2	ENSG00000165675	-1.146417877	1.71E-06	9.15E-06	Down
CLOCK	ENSG00000134852	-1.138720765	1.77E-06	9.50E-06	Down
FRS3	ENSG00000137218	1.342242307	1.79E-06	9.55E-06	Ups
LINC02035	ENSG00000273033	-1.072836986	1.83E-06	9.76E-06	Down
FBXL4	ENSG00000112234	-1.045688332	2.06E-06	1.09E-05	Down
ANKRD26	ENSG00000107890	-1.003959144	2.13E-06	1.13E-05	Down
DHFR2	ENSG00000178700	-1.027268246	2.45E-06	1.28E-05	Down
ALPP	ENSG00000163283	-1.354518871	2.46E-06	1.28E-05	Down
SGCB	ENSG00000163069	-1.000544192	2.62E-06	1.36E-05	Down
ZNF611	ENSG00000213020	-1.030535341	2.68E-06	1.38E-05	Down
LURAP1L	ENSG00000153714	1.811844014	3.15E-06	1.61E-05	Ups
ANKRD18B	ENSG00000230453	-1.179732092	3.39E-06	1.72E-05	Down
ATP11C	ENSG00000101974	-1.079252298	3.42E-06	1.73E-05	Down
TMEM40	ENSG00000088726	1.512131055	3.76E-06	1.89E-05	Ups
NKAPP1	ENSG00000233382	1.659388422	3.83E-06	1.93E-05	Ups
PGM2L1	ENSG00000165434	-1.374634514	3.89E-06	1.95E-05	Down
SCN1B	ENSG00000105711	1.192452964	4.24E-06	2.11E-05	Ups
SNORD46	ENSG00000200913	1.595726485	4.29E-06	2.14E-05	Ups
ZNF619	ENSG00000177873	1.605385081	4.44E-06	2.21E-05	Ups
TCF7	ENSG00000081059	-1.37413369	4.59E-06	2.28E-05	Down
GGACT	ENSG00000134864	1.569962052	4.71E-06	2.33E-05	Ups
ZRANB3	ENSG00000121988	-1.161014942	5.47E-06	2.67E-05	Down
GALNT9	ENSG00000182870	1.353260439	5.56E-06	2.71E-05	Ups
AC106045.1	ENSG00000287331	1.023400293	5.67E-06	2.76E-05	Ups
COL1A2	ENSG00000164692	1.813234279	5.89E-06	2.86E-05	Ups
PARD6B	ENSG00000124171	-1.01190835	5.97E-06	2.89E-05	Down
SH3RF1	ENSG00000154447	-1.067963178	6.25E-06	3.02E-05	Down
PTGS2	ENSG00000073756	-1.052300134	6.59E-06	3.17E-05	Down
ARRDC4	ENSG00000140450	-1.252940551	6.74E-06	3.24E-05	Down
GLIPR2	ENSG00000122694	1.178693042	6.91E-06	3.31E-05	Ups
MTMR11	ENSG00000014914	1.213173209	6.96E-06	3.33E-05	Ups
ALPG	ENSG00000163286	-1.493168419	7.92E-06	3.75E-05	Down
MFSD6	ENSG00000151690	-1.054052127	9.17E-06	4.29E-05	Down
STXBP4	ENSG00000166263	-1.121955318	9.21E-06	4.30E-05	Down
AL590617.2	ENSG00000225177	1.001446085	9.90E-06	4.59E-05	Ups
RENBP	ENSG00000102032	1.769946094	1.02E-05	4.73E-05	Ups
PRPH	ENSG00000135406	1.207212071	1.08E-05	4.98E-05	Ups
FRRS1	ENSG00000156869	-1.047446236	1.13E-05	5.19E-05	Down
LNCTAM34A	ENSG00000234546	1.217881055	1.15E-05	5.28E-05	Ups
ADAP1	ENSG00000105963	1.050077444	1.19E-05	5.46E-05	Ups
AC125611.4	ENSG00000258334	1.754402888	1.30E-05	5.91E-05	Ups
CCDC186	ENSG00000165813	-1.114874794	1.43E-05	6.44E-05	Down
DEPP1	ENSG00000165507	1.441665799	1.48E-05	6.65E-05	Ups
AC116021.1	ENSG00000254639	1.527564603	1.66E-05	7.38E-05	Ups
LYZ	ENSG00000090382	-1.731077592	1.66E-05	7.40E-05	Down
MINCR	ENSG00000253716	1.180260305	1.77E-05	7.83E-05	Ups
AC027031.2	ENSG00000254615	1.54720323	1.96E-05	8.59E-05	Ups
WDR7	ENSG00000091157	-1.163892148	2.01E-05	8.79E-05	Down
KLF17	ENSG00000171872	-1.022401973	2.02E-05	8.82E-05	Down
CREB5	ENSG00000146592	1.596324241	2.17E-05	9.42E-05	Ups
ULBP1	ENSG00000111981	-1.256800248	2.21E-05	9.59E-05	Down
ZNF546	ENSG00000187187	-1.290284635	2.23E-05	9.66E-05	Down
ETNK2	ENSG00000143845	1.191317434	2.23E-05	9.66E-05	Ups
GALNT13	ENSG00000144278	-1.510885058	2.23E-05	9.68E-05	Down
SDSL	ENSG00000139410	1.055870469	2.33E-05	0.000100814	Ups
FSD1	ENSG00000105255	1.183911625	2.34E-05	0.000101222	Ups
LINC00475	ENSG00000225511	1.371346736	2.53E-05	0.00010857	Ups
MINAR1	ENSG00000169330	-1.29266063	2.55E-05	0.000109498	Down
C13orf46	ENSG00000283199	-1.219057573	2.58E-05	0.000110333	Down
SCAPER	ENSG00000140386	-1.083519725	2.58E-05	0.000110489	Down
PLEKHN1	ENSG00000187583	1.062031265	2.61E-05	0.000111756	Ups
AC019171.1	ENSG00000269210	1.548259895	2.71E-05	0.000115417	Ups
AL353572.4	ENSG00000287750	1.015214543	2.85E-05	0.000120919	Ups
H2AC8	ENSG00000277075	1.015551425	2.90E-05	0.000122595	Ups
ZBTB37	ENSG00000185278	-1.034176024	2.90E-05	0.000122642	Down
Metazoa_SRP	ENSG00000203411	1.677355036	2.92E-05	0.000123336	Ups
TRIM52-AS1	ENSG00000248275	1.060675281	3.02E-05	0.000127538	Ups
KIAA0586	ENSG00000100578	-1.028153975	3.17E-05	0.00013329	Down
TGFBI	ENSG00000120708	1.360370043	3.20E-05	0.000134478	Ups
PDE7B	ENSG00000171408	-1.04244665	3.44E-05	0.000143603	Down
CPEB4	ENSG00000113742	-1.015776075	3.48E-05	0.000145034	Down
SPEG	ENSG00000072195	1.504570047	3.48E-05	0.000145063	Ups
RAPGEF4	ENSG00000091428	-1.630419226	3.65E-05	0.000151567	Down
COA1	ENSG00000106603	1.142360096	3.77E-05	0.000156031	Ups
CEP112	ENSG00000154240	-1.099272316	3.81E-05	0.000157809	Down
CEP128	ENSG00000100629	-1.043968528	4.23E-05	0.000173438	Down
DPH1	ENSG00000108963	1.244053771	4.30E-05	0.00017594	Ups
PEAR1	ENSG00000187800	1.16130479	4.39E-05	0.000179312	Ups
CSF1R	ENSG00000182578	-1.227167655	4.60E-05	0.000187058	Down
SNHG21	ENSG00000250988	1.05112582	4.61E-05	0.000187558	Ups
PLEKHO1	ENSG00000023902	1.028013489	4.83E-05	0.000195453	Ups
FTLP3	ENSG00000226608	1.016108348	4.94E-05	0.000199314	Ups
CIB2	ENSG00000136425	1.089704773	4.95E-05	0.000199739	Ups
DPEP1	ENSG00000015413	-1.143394793	5.07E-05	0.000204002	Down
PPP1R14C	ENSG00000198729	1.494164805	5.38E-05	0.000215477	Ups
HSPA6	ENSG00000173110	1.580022874	5.57E-05	0.000222161	Ups
SNORD104	ENSG00000199753	1.221359405	5.95E-05	0.000236216	Ups
GTDC1	ENSG00000121964	-1.061732965	5.98E-05	0.000237288	Down
GAMT	ENSG00000130005	1.284889849	6.05E-05	0.000239801	Ups
CRISPLD1	ENSG00000121005	-1.092432509	6.30E-05	0.000248807	Down
LINC01063	ENSG00000232065	1.606888852	6.54E-05	0.000257537	Ups
KLHL3	ENSG00000146021	-1.345961134	7.13E-05	0.000279162	Down
SELENBP1	ENSG00000143416	1.187034322	7.30E-05	0.000284789	Ups
SIPA1L1	ENSG00000197555	-1.379945034	7.55E-05	0.000293663	Down
AC093484.4	ENSG00000266651	1.188358798	7.77E-05	0.000301538	Ups
TMEM131L	ENSG00000121210	-1.024070823	7.79E-05	0.000302379	Down
TMEM54	ENSG00000121900	1.294779541	7.85E-05	0.000304382	Ups
EPHA7	ENSG00000135333	-1.197390926	8.08E-05	0.000312905	Down
GPLD1	ENSG00000112293	-1.221229481	8.14E-05	0.000314909	Down
IGHM	ENSG00000211899	-1.5537309	8.15E-05	0.000315221	Down
KCTD17	ENSG00000100379	1.564735801	8.46E-05	0.000326408	Ups
LMLN	ENSG00000185621	-1.077358269	8.79E-05	0.000337759	Down
CYP1A1	ENSG00000140465	1.513552674	9.56E-05	0.000363996	Ups
AC133552.5	ENSG00000275494	1.476392178	9.69E-05	0.000368382	Ups
LINC02245	ENSG00000237638	1.080441141	9.89E-05	0.000375445	Ups
ATOH7	ENSG00000179774	1.408631478	0.000100097	0.000379619	Ups
AC009133.1	ENSG00000238045	1.066965891	0.000100473	0.000380867	Ups
AP000648.4	ENSG00000280385	-1.209970118	0.00010266	0.000388238	Down
PLEKHG4	ENSG00000196155	1.006197066	0.000105692	0.000398387	Ups
CDON	ENSG00000064309	-1.088989393	0.000111658	0.000419196	Down
AL137800.1	ENSG00000286966	1.478950987	0.000112806	0.000422711	Ups
PARP14	ENSG00000173193	-1.206542779	0.00011377	0.000426124	Down
FXYD3	ENSG00000089356	1.134931293	0.000114509	0.000428568	Ups
AP001781.1	ENSG00000254990	-1.527348775	0.000121706	0.000452777	Down
SESN3	ENSG00000149212	-1.06536916	0.000122325	0.000454555	Down
REL	ENSG00000162924	-1.072316645	0.000132182	0.000488462	Down
AC064836.2	ENSG00000273456	1.510459583	0.000133136	0.000491754	Ups
PPP2R3A	ENSG00000073711	-1.128335827	0.000137826	0.000507091	Down
PRSS16	ENSG00000112812	1.333709161	0.000138118	0.00050805	Ups
CEACAM7	ENSG00000007306	-1.383207996	0.000139133	0.000511666	Down
ZNF143	ENSG00000166478	-1.113543709	0.000153432	0.000559499	Down
PNCK	ENSG00000130822	1.266305484	0.000155607	0.000566655	Ups
MYEOV	ENSG00000172927	1.120170489	0.000156	0.000567955	Ups
DEF8	ENSG00000140995	1.249876548	0.000159419	0.000579349	Ups
NBEA	ENSG00000172915	-1.232039896	0.000164636	0.00059655	Down
C1QTNF1-AS1	ENSG00000265096	1.491882586	0.000166366	0.000601863	Ups
MAPK8IP2	ENSG00000008735	-1.32627587	0.000172542	0.00062294	Down
PRRT2	ENSG00000167371	1.167762828	0.000179367	0.000645254	Ups
BIRC3	ENSG00000023445	-1.006920676	0.000180984	0.000650485	Down
FAM83B	ENSG00000168143	-1.316251465	0.000182797	0.000656119	Down
AC007773.1	ENSG00000267213	1.482047264	0.000183218	0.000657334	Ups
GPR155	ENSG00000163328	-1.328896141	0.000185613	0.00066485	Down
AL022162.1	ENSG00000287024	1.312201047	0.00020439	0.000726941	Ups
EEF1AKMT2	ENSG00000203791	1.101267276	0.000205056	0.000729148	Ups
DNAJC18	ENSG00000170464	-1.023078057	0.00020675	0.000734846	Down
NAAA	ENSG00000138744	1.359172344	0.000217974	0.000771998	Ups
NALCN	ENSG00000102452	1.435246347	0.000222907	0.000788423	Ups
VMO1	ENSG00000182853	1.430306526	0.000233085	0.000821156	Ups
FOXP4-AS1	ENSG00000234753	1.070282937	0.000238925	0.000839331	Ups
PLXNC1	ENSG00000136040	-1.452636592	0.000250805	0.000877407	Down
ZNF440	ENSG00000171295	-1.129693627	0.000269977	0.000939755	Down
RAB11FIP1P1	ENSG00000228492	-1.457777227	0.000278124	0.000966641	Down
SATB2-AS1	ENSG00000225953	1.014224304	0.000279898	0.000971963	Ups
IL22RA1	ENSG00000142677	1.265624767	0.000280692	0.000973877	Ups
DHDH	ENSG00000104808	1.441537966	0.000282448	0.00097912	Ups
BOLA3	ENSG00000163170	1.265176939	0.000283479	0.000982481	Ups
AC012676.3	ENSG00000277170	1.459928053	0.000285888	0.000990188	Ups
MIR181A2HG	ENSG00000224020	1.134872551	0.00029148	0.001007376	Ups
PAPPA2	ENSG00000116183	-1.302821747	0.000293832	0.001014715	Down
MACROD2	ENSG00000172264	-1.050492818	0.000306469	0.001052975	Down
C17orf113	ENSG00000267221	1.276453398	0.000312808	0.001072984	Ups
JMJD1C-AS1	ENSG00000272767	1.353826025	0.000317309	0.001087025	Ups
NALT1	ENSG00000237886	1.183738095	0.000318188	0.001089804	Ups
RBFOX3	ENSG00000167281	1.269452718	0.000319438	0.001093617	Ups
ANKRD29	ENSG00000154065	1.04182479	0.000325346	0.001112179	Ups
HOMER3-AS1	ENSG00000269019	1.436288806	0.000357429	0.001210738	Ups
CTSS	ENSG00000163131	-1.374165239	0.000375773	0.001268581	Down
SNCG	ENSG00000173267	1.297479501	0.000377726	0.001274637	Ups
DPF1	ENSG00000011332	1.048757704	0.000390056	0.001312922	Ups
LINC00923	ENSG00000251209	-1.128641272	0.000400181	0.001342208	Down
GRIP2	ENSG00000144596	1.24900839	0.000401208	0.001345089	Ups
AL139352.1	ENSG00000132832	1.369471691	0.000405805	0.001358793	Ups
AL109976.1	ENSG00000277287	1.201397794	0.000409635	0.00137047	Ups
RBP4	ENSG00000138207	1.045793105	0.000421609	0.001407298	Ups
DMAC1	ENSG00000137038	1.02458038	0.000426738	0.00142175	Ups
NR4A1AS	ENSG00000259884	1.269266405	0.000447915	0.001487354	Ups
HSD17B14	ENSG00000087076	1.330372695	0.000456379	0.001512949	Ups
AC009403.1	ENSG00000216895	1.231798859	0.000458759	0.00152021	Ups
AC020765.2	ENSG00000275441	1.218386838	0.000527398	0.001732602	Ups
AC022211.4	ENSG00000279035	1.087513793	0.000528687	0.001736478	Ups
C9orf116	ENSG00000160345	1.062420732	0.000533977	0.001752776	Ups
AL355488.1	ENSG00000273373	-1.012417449	0.000548546	0.001795814	Down
AC016876.3	ENSG00000264772	1.061515113	0.000550955	0.001802961	Ups
FAM13A	ENSG00000138640	-1.07090759	0.000585076	0.001905273	Down
H2AC17	ENSG00000278677	1.18387089	0.000607116	0.001972234	Ups
DCP1B	ENSG00000151065	1.105820289	0.000640711	0.002076099	Ups
ARC	ENSG00000198576	1.364073983	0.000640774	0.002076099	Ups
ADRB1	ENSG00000043591	1.100323802	0.00065066	0.002105572	Ups
ZNF561-AS1	ENSG00000267106	1.076018412	0.000652506	0.002111119	Ups
UCN	ENSG00000163794	1.111967335	0.000664942	0.002147882	Ups
NRXN3	ENSG00000021645	-1.149520845	0.000669805	0.002162718	Down
ATXN1-AS1	ENSG00000229931	1.322042653	0.000670511	0.002164562	Ups
CCNT2-AS1	ENSG00000224043	-1.08165382	0.000681533	0.0021977	Down
SUSD2	ENSG00000099994	-1.023342508	0.000685352	0.002208907	Down
AC004801.6	ENSG00000276814	-1.353326069	0.000685803	0.002209472	Down
SORL1	ENSG00000137642	-1.222139639	0.000694248	0.002233533	Down
AC000123.3	ENSG00000280347	-1.299356812	0.000722195	0.002316464	Down
AQP7	ENSG00000165269	1.126502517	0.000723316	0.00231913	Ups
NFE2	ENSG00000123405	1.208550631	0.000742612	0.002375766	Ups
KLHDC7B	ENSG00000130487	1.082867635	0.000769142	0.002455245	Ups
AC107959.4	ENSG00000284948	1.335960061	0.000803288	0.002550247	Ups
TMEM255B	ENSG00000184497	1.20189173	0.000803363	0.002550247	Ups
STRA6	ENSG00000137868	1.312239871	0.000831655	0.002628953	Ups
COMMD7	ENSG00000149600	1.000268437	0.000891418	0.002797059	Ups
AC023024.2	ENSG00000279970	-1.005105063	0.000897231	0.002812541	Down
AC138028.6	ENSG00000278341	-1.294928725	0.000906405	0.002839077	Down
RNVU1-30	ENSG00000206828	1.330765401	0.000907503	0.002841959	Ups
STXBP5L	ENSG00000145087	-1.135957689	0.00094048	0.002932041	Down
IGKC	ENSG00000211592	-1.294143083	0.000949958	0.002957558	Down
GACAT2	ENSG00000265962	1.213069868	0.00097256	0.003020292	Ups
AL031777.2	ENSG00000282988	1.278719432	0.001010892	0.003129018	Ups
MB	ENSG00000198125	1.319170854	0.0010219	0.003156987	Ups
IFITM1	ENSG00000185885	1.116593155	0.001026974	0.003169603	Ups
ZNF165	ENSG00000197279	-1.030586353	0.001060826	0.00326339	Down
LINC02600	ENSG00000250986	1.112122769	0.001080139	0.003316429	Ups
LINC02615	ENSG00000251432	-1.066865927	0.001082988	0.00332263	Down
MAN2C1	ENSG00000140400	1.084961346	0.001090922	0.003345048	Ups
LINC02482	ENSG00000251580	1.308727657	0.001098362	0.003365284	Ups
AC046143.1	ENSG00000229334	1.264582786	0.001117025	0.003417235	Ups
SNX18P7	ENSG00000234373	-1.306380697	0.001166107	0.003549753	Down
LCN2	ENSG00000148346	1.204522391	0.001196305	0.003633391	Ups
BX470102.1	ENSG00000238279	1.097430013	0.001205503	0.003657164	Ups
ROBO3	ENSG00000154134	1.156620737	0.001213005	0.00367366	Ups
YTHDF3-AS1	ENSG00000270673	1.17483954	0.001256735	0.003791041	Ups
GPR1	ENSG00000183671	1.219801166	0.001264297	0.003812416	Ups
ZC3H12B	ENSG00000102053	-1.132180154	0.001303894	0.003921478	Down
AC091390.4	ENSG00000239969	1.228374198	0.001367746	0.004094288	Ups
ALKBH8	ENSG00000137760	-1.089224391	0.001407344	0.004199476	Down
GPT	ENSG00000167701	1.003965522	0.001412197	0.004210819	Ups
CFAP44	ENSG00000206530	-1.015427288	0.001426908	0.004251518	Down
TLR6	ENSG00000174130	-1.197950306	0.001537294	0.004552014	Down
IGIP	ENSG00000182700	-1.10945284	0.001551134	0.004588352	Down
ACBD4	ENSG00000181513	1.015970199	0.001567642	0.004633761	Ups
NCKAP5	ENSG00000176771	-1.033907236	0.001573827	0.00464947	Down
MARCHF3	ENSG00000173926	1.107068554	0.001576159	0.0046555	Ups
ACTN2	ENSG00000077522	-1.255115471	0.001593099	0.004695142	Down
AC008014.1	ENSG00000257261	1.133764017	0.001660235	0.004876844	Ups
ERCC5	ENSG00000134899	-1.007819259	0.001674392	0.004913023	Down
AC008393.1	ENSG00000245317	1.258418852	0.001730919	0.005064036	Ups
ATP10D	ENSG00000145246	-1.248413075	0.001772412	0.005175972	Down
ARAP2	ENSG00000047365	-1.029964403	0.001774076	0.005178943	Down
PPM1J	ENSG00000155367	1.126124376	0.001788392	0.005214081	Ups
SYT17	ENSG00000103528	1.168169878	0.001819475	0.0052941	Ups
C1QL4	ENSG00000186897	1.201869646	0.001841119	0.005347361	Ups
CDHR4	ENSG00000187492	1.026984071	0.001844744	0.005356916	Ups
PTPRB	ENSG00000127329	-1.171452684	0.00185219	0.005375614	Down
C18orf54	ENSG00000166845	-1.087821111	0.001892678	0.005482194	Down
AL021578.1	ENSG00000275894	1.238843717	0.001894118	0.005485371	Ups
LGSN	ENSG00000146166	-1.181529197	0.001922038	0.005557181	Down
CEACAM5	ENSG00000105388	-1.243633377	0.001928648	0.005572268	Down
ZNF117	ENSG00000152926	-1.187566181	0.002000722	0.005757649	Down
AC006262.2	ENSG00000269729	1.071225521	0.002038784	0.005855607	Ups
AC006128.1	ENSG00000279716	1.205055263	0.002086563	0.005978892	Ups
AC109326.1	ENSG00000279602	1.004693023	0.002094931	0.006000722	Ups
RAB7B	ENSG00000276600	1.215998205	0.00213418	0.006104412	Ups
GJB2	ENSG00000165474	1.183795007	0.002154551	0.006157178	Ups
AC073342.1	ENSG00000231840	-1.219090499	0.002174849	0.006208538	Down
CYP24A1	ENSG00000019186	-1.164829884	0.00222672	0.006340786	Down
LINC02762	ENSG00000250303	1.116478736	0.002330302	0.006608713	Ups
NEK1	ENSG00000137601	-1.020915797	0.002344118	0.006645541	Down
AC009118.2	ENSG00000276131	1.161510288	0.002361603	0.006692741	Ups
AP001107.4	ENSG00000254461	1.121393861	0.002386035	0.006754809	Ups
AC004585.1	ENSG00000266088	1.202984115	0.002414816	0.006827837	Ups
SNORD60	ENSG00000206630	1.195680847	0.002481134	0.006996815	Ups
AC004882.3	ENSG00000287967	1.134262547	0.002531272	0.00712315	Ups
APLN	ENSG00000171388	1.006262319	0.002568512	0.007217391	Ups
MESP2	ENSG00000188095	1.060399423	0.002593704	0.0072822	Ups
AC145676.1	ENSG00000249852	-1.161712513	0.002635174	0.007385682	Down
LINC01971	ENSG00000278200	1.204398894	0.002637721	0.007390235	Ups
DYRK4	ENSG00000010219	1.168178866	0.002639266	0.007391976	Ups
TCERG1L-AS1	ENSG00000230098	1.170378206	0.002697998	0.007539326	Ups
AZIN2	ENSG00000142920	1.172697622	0.002730219	0.007621386	Ups
S1PR1	ENSG00000170989	1.200598905	0.002745708	0.007656613	Ups
AP000759.1	ENSG00000255320	-1.015347102	0.002753424	0.007675457	Down
ABCB1	ENSG00000085563	-1.197380315	0.002862996	0.007944938	Down
ASRGL1	ENSG00000162174	1.019726806	0.002864128	0.007946703	Ups
VIPR1-AS1	ENSG00000232354	1.103025485	0.002883407	0.007994653	Ups
ACTA2	ENSG00000107796	1.173370111	0.002883985	0.007994871	Ups
DDC	ENSG00000132437	1.18549491	0.002946883	0.008149479	Ups
Y_RNA	ENSG00000201451	-1.180752822	0.003030032	0.008357774	Down
AL359232.1	ENSG00000258561	1.16717568	0.003129417	0.00860966	Ups
FAM86FP	ENSG00000164845	1.037362294	0.003137897	0.008627061	Ups
KCNAB1	ENSG00000169282	-1.123444427	0.003169516	0.008706518	Down
LCN15	ENSG00000177984	1.159919829	0.003277038	0.008963432	Ups
FRY	ENSG00000073910	-1.050327414	0.003355542	0.009142238	Down
SNORA65	ENSG00000201302	1.080417957	0.003385868	0.009217021	Ups
PELI2	ENSG00000139946	1.023057888	0.003475129	0.009431449	Ups
AL157392.3	ENSG00000239665	-1.015608368	0.003509733	0.009513771	Down
AL603839.3	ENSG00000238287	1.134901368	0.003520549	0.009541473	Ups
SEMA6D	ENSG00000137872	-1.118677389	0.003600835	0.009735996	Down
AC138904.1	ENSG00000246465	1.00752884	0.00363045	0.009806135	Ups
GLI1	ENSG00000111087	1.132729346	0.003719185	0.010018772	Ups
GALR2	ENSG00000182687	-1.051615636	0.00375069	0.010096847	Down
FGFR2	ENSG00000066468	-1.15056739	0.003757733	0.010109009	Down
SAMD14	ENSG00000167100	1.148173655	0.003977071	0.010634947	Ups
ATP2A1-AS1	ENSG00000260442	1.078765009	0.00399444	0.010675842	Ups
AP003469.2	ENSG00000253395	1.144302706	0.004224223	0.011233726	Ups
B4GALNT2	ENSG00000167080	1.125431229	0.004280382	0.011356665	Ups
REM2	ENSG00000139890	1.032466309	0.004342452	0.011504193	Ups
AC005829.1	ENSG00000261575	1.146078178	0.004394127	0.011627626	Ups
DNAJC28	ENSG00000177692	-1.129402877	0.004413976	0.011668579	Down
SLC25A21-AS1	ENSG00000258708	1.100960846	0.004453814	0.011758363	Ups
AC092645.1	ENSG00000278962	-1.018418071	0.004473025	0.011805188	Down
CDRT4	ENSG00000239704	-1.134704242	0.004602719	0.012119509	Down
SCAT1	ENSG00000267123	1.136318881	0.004606748	0.012128125	Ups
ENTPD1	ENSG00000138185	-1.065725597	0.004765237	0.012487885	Down
ZNF804A	ENSG00000170396	-1.022110958	0.004919335	0.01282455	Down
MIR7111	ENSG00000276712	1.114363573	0.004923917	0.012834406	Ups
ART5	ENSG00000167311	1.086548643	0.004954464	0.012903527	Ups
COL25A1	ENSG00000188517	-1.095364981	0.004969123	0.012931188	Down
BCYRN1	ENSG00000236824	1.123647456	0.005073205	0.013178481	Ups
AC136475.3	ENSG00000255026	1.091870772	0.005175615	0.013409701	Ups
TMC5	ENSG00000103534	-1.022650225	0.005307605	0.013716167	Down
AC125494.1	ENSG00000219410	-1.117460737	0.005464005	0.014070385	Down
ZNF311	ENSG00000197935	1.029914133	0.005550128	0.014266921	Ups
AC113607.1	ENSG00000234796	-1.056119697	0.005643065	0.014484893	Down
SVIL2P	ENSG00000234814	-1.076045597	0.005756734	0.014745933	Down
C16orf54	ENSG00000185905	1.089717831	0.005879187	0.015013962	Ups
P2RX6	ENSG00000099957	1.091112338	0.005963416	0.015212078	Ups
RUNDC3A-AS1	ENSG00000267750	1.032217357	0.006005959	0.015310845	Ups
SLC16A11	ENSG00000174326	-1.098278709	0.006067948	0.015436922	Down
RAET1L	ENSG00000155918	1.005075697	0.006158528	0.015631908	Ups
LGI4	ENSG00000153902	1.097554112	0.006167778	0.015648622	Ups
PCOLCE-AS1	ENSG00000224729	1.084465044	0.0063111	0.015986921	Ups
AC004847.1	ENSG00000260997	-1.059222291	0.006801186	0.017079766	Down
AC008946.1	ENSG00000267939	1.007866358	0.006960653	0.017425576	Ups
AC103591.3	ENSG00000273338	1.063360698	0.007137158	0.01782564	Ups
Z97192.3	ENSG00000235111	1.058752608	0.007398414	0.018397796	Ups
LAG3	ENSG00000089692	1.070692769	0.007435702	0.018479042	Ups
AC010271.1	ENSG00000268366	1.030292386	0.00764002	0.018916345	Ups
COL8A1	ENSG00000144810	-1.021686671	0.007788523	0.019248316	Down
AL662890.1	ENSG00000225173	1.023197759	0.007922354	0.019563963	Ups
POC1B-AS1	ENSG00000270344	1.068741533	0.007924444	0.019566106	Ups
AC007066.2	ENSG00000261094	-1.009221369	0.008399488	0.020608736	Down
AC127496.1	ENSG00000261924	-1.060265082	0.008424087	0.020656429	Down
ARHGAP25	ENSG00000163219	-1.048417641	0.008438174	0.020678304	Down
THAP12P7	ENSG00000253919	-1.039807305	0.008678972	0.021219683	Down
H2BC6	ENSG00000274290	1.053763788	0.008779843	0.021426131	Ups
AC104506.1	ENSG00000273204	1.000618832	0.008972938	0.021838376	Ups
SNORD14E	ENSG00000200879	1.027588256	0.009060258	0.022020773	Ups
MIPEPP3	ENSG00000233325	1.022208236	0.009240045	0.02239994	Ups
KCND3	ENSG00000171385	-1.044001233	0.009241807	0.022400819	Down
PRRG2	ENSG00000126460	-1.043985148	0.009325955	0.02257744	Down
YY2	ENSG00000230797	-1.019050387	0.009489257	0.022931178	Down
SCGB1D2	ENSG00000124935	1.021803157	0.010085083	0.024184867	Ups
MIR27B	ENSG00000207864	1.03251834	0.010265797	0.024566723	Ups
ARID3C	ENSG00000205143	1.00635234	0.010576185	0.025226556	Ups
KLHL38	ENSG00000175946	-1.024772399	0.010705201	0.025484935	Down
SULF1	ENSG00000137573	-1.022084527	0.010802369	0.025693335	Down
LINC02816	ENSG00000225857	-1.025030304	0.010826719	0.025743603	Down
AL122035.2	ENSG00000272909	-1.017852081	0.011353705	0.026829327	Down
SLCO1C1	ENSG00000139155	-1.015550318	0.011629196	0.027391058	Down
ZNF665	ENSG00000197497	1.009428856	0.011727182	0.027585667	Ups
AL031778.1	ENSG00000287678	-1.008858674	0.012192522	0.028521062	Down
SAXO2	ENSG00000188659	1.002079387	0.012342883	0.028834876	Ups
AC138904.3	ENSG00000283662	1.004024405	0.012526719	0.029208944	Ups
SVOPL	ENSG00000157703	1.000389744	0.012664033	0.029481898	Ups
