# Supplementary material for: A Novel Phenazine Analog, CPUL1, Suppresses Autophagic Flux and Proliferation in Hepatocellular Carcinoma: Insight from Integrated Transcriptomic and Metabolomic Analysis
Source: Cancers (Basel). 2023 Mar 5;15(5):1607. doi: 10.3390/cancers15051607 (PMC10001020; doi:10.3390/cancers15051607)
Supplement: Supplementary file 1 [file cancers-15-01607-s001.zip › Supplementary File S3.xls]

Group	Category	Term	Count	%	PValue	Genes	List Total	Pop Hits	Pop Total	Fold Enrichment	Bonferroni	Benjamini	FDR
6h_vs_Control	GOTERM_BP_DIRECT	GO:0030198~extracellular matrix organization	9	90	2.66E-15	ITGB1, COL4A2, COL4A1, ITGA1, ITGA6, LAMB1, LAMC1, ITGA5, HSPG2	10	196	16792	77.10612245	4.93E-13	4.92E-13	4.44E-13
6h_vs_Control	GOTERM_BP_DIRECT	GO:0007229~integrin-mediated signaling pathway	4	40	0.0000163	ITGB1, ITGA1, ITGA6, ITGA5	10	99	16792	67.84646465	0.00300616	0.001505332	0.001358867
6h_vs_Control	GOTERM_BP_DIRECT	GO:0033627~cell adhesion mediated by integrin	3	30	0.0000267	ITGB1, ITGA6, ITGA5	10	15	16792	335.84	0.004930353	0.001599533	0.001443903
6h_vs_Control	GOTERM_BP_DIRECT	GO:0031589~cell-substrate adhesion	3	30	0.0000346	ITGB1, ITGA6, ITGA5	10	17	16792	296.3294118	0.006377817	0.001599533	0.001443903
6h_vs_Control	GOTERM_BP_DIRECT	GO:0035987~endodermal cell differentiation	3	30	0.000089	COL4A2, LAMB1, ITGA5	10	27	16792	186.5777778	0.016332857	0.00319361	0.00288288
6h_vs_Control	GOTERM_BP_DIRECT	GO:0030335~positive regulation of cell migration	4	40	0.000104	ITGA6, LAMB1, ITGA5, EGFR	10	184	16792	36.50434783	0.018980214	0.00319361	0.00288288
6h_vs_Control	GOTERM_BP_DIRECT	GO:0050679~positive regulation of epithelial cell proliferation	3	30	0.000445	LAMB1, LAMC1, EGFR	10	60	16792	83.96	0.079002845	0.01175429	0.010610629
6h_vs_Control	GOTERM_BP_DIRECT	GO:0007160~cell-matrix adhesion	3	30	0.000998	ITGB1, ITGA1, ITGA6	10	90	16792	55.97333333	0.168663766	0.023078595	0.02083311
6h_vs_Control	GOTERM_BP_DIRECT	GO:0007155~cell adhesion	4	40	0.001507293	ITGA6, LAMB1, LAMC1, ITGA5	10	459	16792	14.6335512	0.243505179	0.030983247	0.027968661
6h_vs_Control	GOTERM_BP_DIRECT	GO:0050900~leukocyte migration	3	30	0.001822944	ITGB1, ITGA6, ITGA5	10	122	16792	41.29180328	0.28648536	0.033724456	0.030443158
6h_vs_Control	GOTERM_BP_DIRECT	GO:0033631~cell-cell adhesion mediated by integrin	2	20	0.002142346	ITGB1, ITGA5	10	4	16792	839.6	0.327504067	0.03603037	0.032524712
6h_vs_Control	GOTERM_BP_DIRECT	GO:0007044~cell-substrate junction assembly	2	20	0.003211989	ITGA6, ITGA5	10	6	16792	559.7333333	0.448533554	0.045709071	0.041261702
6h_vs_Control	GOTERM_BP_DIRECT	GO:0038063~collagen-activated tyrosine kinase receptor signaling pathway	2	20	0.003211989	COL4A2, COL4A1	10	6	16792	559.7333333	0.448533554	0.045709071	0.041261702
6h_vs_Control	GOTERM_BP_DIRECT	GO:0001525~angiogenesis	3	30	0.00594392	COL4A2, ITGA5, HSPG2	10	223	16792	22.59013453	0.668094893	0.078544652	0.070902469
6h_vs_Control	GOTERM_BP_DIRECT	GO:0031581~hemidesmosome assembly	2	20	0.006414804	ITGA6, LAMC1	10	12	16792	279.8666667	0.695949476	0.079115913	0.071418148
6h_vs_Control	GOTERM_BP_DIRECT	GO:2000811~negative regulation of anoikis	2	20	0.009076825	ITGB1, ITGA5	10	17	16792	197.5529412	0.814903878	0.104950789	0.09473936
6h_vs_Control	GOTERM_BP_DIRECT	GO:0034113~heterotypic cell-cell adhesion	2	20	0.011732505	ITGB1, ITGA5	10	22	16792	152.6545455	0.887336143	0.127677256	0.115254604
6h_vs_Control	GOTERM_BP_DIRECT	GO:0007159~leukocyte cell-cell adhesion	2	20	0.013322874	ITGB1, ITGA5	10	25	16792	134.336	0.916365373	0.129722721	0.11710105
6h_vs_Control	GOTERM_BP_DIRECT	GO:0042327~positive regulation of phosphorylation	2	20	0.013322874	ITGA6, EGFR	10	25	16792	134.336	0.916365373	0.129722721	0.11710105
6h_vs_Control	GOTERM_BP_DIRECT	GO:0042059~negative regulation of epidermal growth factor receptor signaling pathway	2	20	0.019134783	ITGA1, EGFR	10	36	16792	93.28888889	0.971963307	0.169764563	0.15324693
6h_vs_Control	GOTERM_BP_DIRECT	GO:0034446~substrate adhesion-dependent cell spreading	2	20	0.020188218	LAMB1, LAMC1	10	38	16792	88.37894737	0.9770178	0.169764563	0.15324693
6h_vs_Control	GOTERM_BP_DIRECT	GO:0010811~positive regulation of cell-substrate adhesion	2	20	0.020188218	ITGA6, ITGA5	10	38	16792	88.37894737	0.9770178	0.169764563	0.15324693
6h_vs_Control	GOTERM_BP_DIRECT	GO:0071230~cellular response to amino acid stimulus	2	20	0.024916242	COL4A1, EGFR	10	47	16792	71.45531915	0.990608052	0.196102497	0.177022254
6h_vs_Control	GOTERM_BP_DIRECT	GO:0048812~neuron projection morphogenesis	2	20	0.025440324	ITGA1, EGFR	10	48	16792	69.96666667	0.991497219	0.196102497	0.177022254
6h_vs_Control	GOTERM_BP_DIRECT	GO:0030574~collagen catabolic process	2	20	0.033791654	COL4A2, COL4A1	10	64	16792	52.475	0.998269805	0.247463067	0.22338558
6h_vs_Control	GOTERM_BP_DIRECT	GO:0043547~positive regulation of GTPase activity	3	30	0.034778593	ITGB1, ITGA6, EGFR	10	565	16792	8.916106195	0.998567862	0.247463067	0.22338558
6h_vs_Control	GOTERM_BP_DIRECT	GO:0022617~extracellular matrix disassembly	2	20	0.040013341	LAMC1, HSPG2	10	76	16792	44.18947368	0.999476325	0.274165487	0.247489927
6h_vs_Control	GOTERM_BP_DIRECT	GO:0046718~viral entry into host cell	2	20	0.042079309	ITGB1, ITGA5	10	80	16792	41.98	0.999648466	0.278024007	0.250973022
6h_vs_Control	GOTERM_CC_DIRECT	GO:0005604~basement membrane	5	50	4.05E-08	COL4A1, ITGA6, LAMB1, LAMC1, HSPG2	10	79	18224	115.3417722	0.000003	0.000003	0.00000235
6h_vs_Control	GOTERM_CC_DIRECT	GO:0008305~integrin complex	4	40	0.000000242	ITGB1, ITGA1, ITGA6, ITGA5	10	27	18224	269.9851852	0.0000179	0.00000896	0.00000702
6h_vs_Control	GOTERM_CC_DIRECT	GO:0005925~focal adhesion	6	60	0.00000052	ITGB1, ITGA1, ITGA6, ITGA5, HSPG2, EGFR	10	391	18224	27.96521739	0.0000385	0.0000128	0.0000101
6h_vs_Control	GOTERM_CC_DIRECT	GO:0031012~extracellular matrix	5	50	0.00000806	COL4A2, COL4A1, LAMB1, LAMC1, HSPG2	10	296	18224	30.78378378	0.000596	0.000149	0.000117
6h_vs_Control	GOTERM_CC_DIRECT	GO:0009986~cell surface	5	50	0.0000866	ITGB1, ITGA1, ITGA6, ITGA5, EGFR	10	542	18224	16.81180812	0.006385117	0.001281062	0.001004076
6h_vs_Control	GOTERM_CC_DIRECT	GO:0009897~external side of plasma membrane	4	40	0.000126	ITGB1, ITGA1, ITGA6, ITGA5	10	213	18224	34.22347418	0.009248457	0.001548484	0.001213677
6h_vs_Control	GOTERM_CC_DIRECT	GO:0034665~integrin alpha1-beta1 complex	2	20	0.000987	ITGB1, ITGA1	10	2	18224	1822.4	0.070501876	0.010439198	0.008182074
6h_vs_Control	GOTERM_CC_DIRECT	GO:0005606~laminin-1 complex	2	20	0.001480912	LAMB1, LAMC1	10	3	18224	1214.933333	0.103869067	0.012176391	0.009543658
6h_vs_Control	GOTERM_CC_DIRECT	GO:0043259~laminin-10 complex	2	20	0.001480912	LAMB1, LAMC1	10	3	18224	1214.933333	0.103869067	0.012176391	0.009543658
6h_vs_Control	GOTERM_CC_DIRECT	GO:0005587~collagen type IV trimer	2	20	0.002959875	COL4A2, COL4A1	10	6	18224	607.4666667	0.196963855	0.021903076	0.017167276
6h_vs_Control	GOTERM_CC_DIRECT	GO:0045121~membrane raft	3	30	0.004344574	ITGB1, ITGA1, EGFR	10	206	18224	26.53980583	0.275445943	0.029227136	0.022907755
6h_vs_Control	GOTERM_CC_DIRECT	GO:0005576~extracellular region	5	50	0.005319557	COL4A2, COL4A1, LAMB1, LAMC1, HSPG2	10	1610	18224	5.659627329	0.326116436	0.032803933	0.025711191
6h_vs_Control	GOTERM_CC_DIRECT	GO:0070062~extracellular exosome	6	60	0.00635553	ITGB1, COL4A2, ITGA1, LAMB1, LAMC1, HSPG2	10	2811	18224	3.889861259	0.376128022	0.036177631	0.02835544
6h_vs_Control	GOTERM_CC_DIRECT	GO:0005913~cell-cell adherens junction	3	30	0.010383425	ITGB1, ITGA6, EGFR	10	323	18224	16.92631579	0.538092415	0.054883817	0.043017046
6h_vs_Control	GOTERM_CC_DIRECT	GO:0005615~extracellular space	4	40	0.024141175	LAMB1, LAMC1, HSPG2, EGFR	10	1347	18224	5.41172977	0.836077888	0.119096465	0.093345878
6h_vs_Control	GOTERM_CC_DIRECT	GO:0005886~plasma membrane	6	60	0.032590677	ITGB1, ITGA1, ITGA6, ITGA5, HSPG2, EGFR	10	4121	18224	2.653336569	0.913868926	0.146369612	0.114722128
6h_vs_Control	GOTERM_CC_DIRECT	GO:0030175~filopodium	2	20	0.034529626	ITGB1, ITGA6	10	71	18224	51.33521127	0.925752398	0.146369612	0.114722128
6h_vs_Control	GOTERM_CC_DIRECT	GO:0048471~perinuclear region of cytoplasm	3	30	0.035603419	ITGB1, LAMB1, EGFR	10	621	18224	8.803864734	0.931621591	0.146369612	0.114722128
6h_vs_Control	GOTERM_CC_DIRECT	GO:0032587~ruffle membrane	2	20	0.039783368	ITGB1, ITGA5	10	82	18224	44.44878049	0.950418168	0.154945751	0.121443967
6h_vs_Control	GOTERM_CC_DIRECT	GO:0001726~ruffle	2	20	0.043588295	ITGB1, ITGA5	10	90	18224	40.49777778	0.963040905	0.16127669	0.126406054
6h_vs_Control	GOTERM_MF_DIRECT	GO:0005201~extracellular matrix structural constituent	4	40	0.00000493	COL4A2, COL4A1, LAMB1, LAMC1	10	67	16881	100.7820896	0.000252	0.000252	0.000242
6h_vs_Control	GOTERM_MF_DIRECT	GO:0005178~integrin binding	4	40	0.0000191	ITGB1, ITGA6, ITGA5, EGFR	10	105	16881	64.30857143	0.000974	0.000487	0.000468
6h_vs_Control	GOTERM_MF_DIRECT	GO:0098639~collagen binding involved in cell-matrix adhesion	2	20	0.002663193	ITGB1, ITGA1	10	5	16881	675.24	0.127160888	0.045274284	0.043498822
6h_vs_Control	GOTERM_MF_DIRECT	GO:0098641~cadherin binding involved in cell-cell adhesion	3	30	0.009776772	ITGB1, ITGA6, EGFR	10	290	16881	17.46310345	0.394117265	0.124653847	0.119765461
6h_vs_Control	GOTERM_MF_DIRECT	GO:0043236~laminin binding	2	20	0.013253032	ITGB1, ITGA6	10	25	16881	135.048	0.493597522	0.13518093	0.129879717
6h_vs_Control	GOTERM_MF_DIRECT	GO:0019903~protein phosphatase binding	2	20	0.033098723	ITGA1, EGFR	10	63	16881	53.59047619	0.820324515	0.267499054	0.257008895
6h_vs_Control	GOTERM_MF_DIRECT	GO:0001618~virus receptor activity	2	20	0.036715556	ITGB1, ITGA5	10	70	16881	48.23142857	0.851583603	0.267499054	0.257008895
6h_vs_Control	KEGG_PATHWAY	hsa04512:ECM-receptor interaction	9	90	4.2E-15	ITGB1, COL4A2, COL4A1, ITGA1, ITGA6, LAMB1, LAMC1, ITGA5, HSPG2	10	87	6879	71.16206897	2.19E-13	2.18E-13	1.8E-13
6h_vs_Control	KEGG_PATHWAY	hsa04510:Focal adhesion	9	90	4.96E-12	ITGB1, COL4A2, COL4A1, ITGA1, ITGA6, LAMB1, LAMC1, ITGA5, EGFR	10	206	6879	30.0538835	2.58E-10	1.29E-10	1.07E-10
6h_vs_Control	KEGG_PATHWAY	hsa04151:PI3K-Akt signaling pathway	9	90	3.19E-10	ITGB1, COL4A2, COL4A1, ITGA1, ITGA6, LAMB1, LAMC1, ITGA5, EGFR	10	345	6879	17.94521739	1.66E-08	5.53E-09	4.57E-09
6h_vs_Control	KEGG_PATHWAY	hsa05222:Small cell lung cancer	6	60	0.000000031	ITGB1, COL4A2, COL4A1, ITGA6, LAMB1, LAMC1	10	85	6879	48.55764706	0.00000161	0.000000403	0.000000333
6h_vs_Control	KEGG_PATHWAY	hsa05200:Pathways in cancer	7	70	0.00000243	ITGB1, COL4A2, COL4A1, ITGA6, LAMB1, LAMC1, EGFR	10	393	6879	12.25267176	0.000126	0.0000253	0.0000209
6h_vs_Control	KEGG_PATHWAY	hsa05412:Arrhythmogenic right ventricular cardiomyopathy (ARVC)	4	40	0.0000712	ITGB1, ITGA1, ITGA6, ITGA5	10	67	6879	41.06865672	0.003693198	0.000617	0.00051
6h_vs_Control	KEGG_PATHWAY	hsa04810:Regulation of actin cytoskeleton	5	50	0.0000943	ITGB1, ITGA1, ITGA6, ITGA5, EGFR	10	210	6879	16.37857143	0.004891226	0.0007	0.000579
6h_vs_Control	KEGG_PATHWAY	hsa05410:Hypertrophic cardiomyopathy (HCM)	4	40	0.000112	ITGB1, ITGA1, ITGA6, ITGA5	10	78	6879	35.27692308	0.00581664	0.000729	0.000603
6h_vs_Control	KEGG_PATHWAY	hsa05414:Dilated cardiomyopathy	4	40	0.00014	ITGB1, ITGA1, ITGA6, ITGA5	10	84	6879	32.75714286	0.007251399	0.000809	0.000669
6h_vs_Control	KEGG_PATHWAY	hsa05146:Amoebiasis	4	40	0.000279	COL4A2, COL4A1, LAMB1, LAMC1	10	106	6879	25.95849057	0.014419233	0.001452217	0.001200872
6h_vs_Control	KEGG_PATHWAY	hsa05145:Toxoplasmosis	4	40	0.000312	ITGB1, ITGA6, LAMB1, LAMC1	10	110	6879	25.01454545	0.016075094	0.001473016	0.001218071
6h_vs_Control	KEGG_PATHWAY	hsa05205:Proteoglycans in cancer	4	40	0.001786623	ITGB1, ITGA5, HSPG2, EGFR	10	200	6879	13.758	0.088795105	0.007742034	0.006402066
6h_vs_Control	KEGG_PATHWAY	hsa04640:Hematopoietic cell lineage	3	30	0.005373404	ITGA1, ITGA6, ITGA5	10	87	6879	23.72068966	0.244345052	0.021493616	0.017773567
48h_vs_Control	GOTERM_BP_DIRECT	GO:0009887~animal organ morphogenesis	6	60	2.16E-09	LAMB3, ITGA2, LAMA3, EP300, LAMB1, LAMC1	10	138	19256	83.72173913	0.000000532	0.000000532	0.000000493
48h_vs_Control	GOTERM_BP_DIRECT	GO:0009888~tissue development	4	40	0.000000459	LAMB3, LAMA3, LAMB1, LAMC1	10	35	19256	220.0685714	0.000113	0.0000564	0.0000523
48h_vs_Control	GOTERM_BP_DIRECT	GO:0007155~cell adhesion	6	60	0.00000228	ITGB1, ITGA2, LAMA3, ITGA1, LAMB1, LAMC1	10	557	19256	20.74254937	0.00056	0.000187	0.000173
48h_vs_Control	GOTERM_BP_DIRECT	GO:0016477~cell migration	5	50	0.00000438	ITGB1, LAMB3, LAMA3, LAMB1, LAMC1	10	268	19256	35.92537313	0.001075931	0.000269	0.000249
48h_vs_Control	GOTERM_BP_DIRECT	GO:0007229~integrin-mediated signaling pathway	4	40	0.0000149	ITGB1, ITGA2, LAMA3, ITGA1	10	110	19256	70.02181818	0.003648874	0.000731	0.000678
48h_vs_Control	GOTERM_BP_DIRECT	GO:0035987~endodermal cell differentiation	3	30	0.0000897	LAMB3, LAMA3, LAMB1	10	31	19256	186.3483871	0.021817046	0.003676261	0.003407267
48h_vs_Control	GOTERM_BP_DIRECT	GO:0033627~cell adhesion mediated by integrin	3	30	0.00015	ITGB1, ITGA2, ITGA1	10	40	19256	144.42	0.036248606	0.005274162	0.004888248
48h_vs_Control	GOTERM_BP_DIRECT	GO:0034446~substrate adhesion-dependent cell spreading	3	30	0.000317	LAMB3, LAMB1, LAMC1	10	58	19256	99.6	0.074953927	0.008957017	0.008301626
48h_vs_Control	GOTERM_BP_DIRECT	GO:0045785~positive regulation of cell adhesion	3	30	0.000328	ITGA2, LAMB1, LAMC1	10	59	19256	97.91186441	0.077461684	0.008957017	0.008301626
48h_vs_Control	GOTERM_BP_DIRECT	GO:0007160~cell-matrix adhesion	3	30	0.001073554	ITGB1, ITGA2, ITGA1	10	107	19256	53.98878505	0.232207766	0.026409425	0.024477028
48h_vs_Control	GOTERM_BP_DIRECT	GO:0018076~N-terminal peptidyl-lysine acetylation	2	20	0.001401578	CREBBP, EP300	10	3	19256	1283.733333	0.291800897	0.031344378	0.029050887
48h_vs_Control	GOTERM_BP_DIRECT	GO:0031581~hemidesmosome assembly	2	20	0.002801409	LAMA3, LAMC1	10	6	19256	641.8666667	0.498481002	0.057428891	0.053226777
48h_vs_Control	GOTERM_BP_DIRECT	GO:0001666~response to hypoxia	3	30	0.003061817	CREBBP, ITGA2, EP300	10	182	19256	31.74065934	0.529689604	0.057938995	0.053699556
48h_vs_Control	GOTERM_BP_DIRECT	GO:0098609~cell-cell adhesion	3	30	0.003331204	ITGA2, LAMA3, ITGA1	10	190	19256	30.40421053	0.559939927	0.058534005	0.054251029
48h_vs_Control	GOTERM_BP_DIRECT	GO:0070831~basement membrane assembly	2	20	0.004665138	LAMB3, LAMB1	10	10	19256	385.12	0.683461115	0.076508261	0.070910096
48h_vs_Control	GOTERM_BP_DIRECT	GO:0048333~mesodermal cell differentiation	2	20	0.005595841	ITGB1, ITGA2	10	12	19256	320.9333333	0.748532811	0.086036049	0.079740728
48h_vs_Control	GOTERM_BP_DIRECT	GO:2001046~positive regulation of integrin-mediated signaling pathway	2	20	0.006060902	LAMB1, LAMC1	10	13	19256	296.2461538	0.775867642	0.087704813	0.081287388
48h_vs_Control	GOTERM_BP_DIRECT	GO:1900034~regulation of cellular response to heat	2	20	0.006990444	CREBBP, EP300	10	15	19256	256.7466667	0.821949485	0.090507856	0.08388533
48h_vs_Control	GOTERM_BP_DIRECT	GO:0051149~positive regulation of muscle cell differentiation	2	20	0.006990444	LAMB1, LAMC1	10	15	19256	256.7466667	0.821949485	0.090507856	0.08388533
48h_vs_Control	GOTERM_BP_DIRECT	GO:0006473~protein acetylation	2	20	0.007454926	CREBBP, EP300	10	16	19256	240.7	0.84130667	0.091695584	0.084986151
48h_vs_Control	GOTERM_BP_DIRECT	GO:0031589~cell-substrate adhesion	2	20	0.009774437	ITGB1, ITGA2	10	21	19256	183.3904762	0.91075233	0.114476776	0.106100426
48h_vs_Control	GOTERM_BP_DIRECT	GO:0002223~stimulatory C-type lectin receptor signaling pathway	2	20	0.01023776	CREBBP, EP300	10	22	19256	175.0545455	0.920457959	0.114476776	0.106100426
48h_vs_Control	GOTERM_BP_DIRECT	GO:0035633~maintenance of permeability of blood-brain barrier	2	20	0.01439901	ITGB1, LAMC1	10	31	19256	124.2322581	0.971785115	0.154006798	0.142738008
48h_vs_Control	GOTERM_BP_DIRECT	GO:0030511~positive regulation of transforming growth factor beta receptor signaling pathway	2	20	0.015782633	CREBBP, EP300	10	34	19256	113.2705882	0.980029361	0.161771985	0.14993501
48h_vs_Control	GOTERM_BP_DIRECT	GO:0031648~protein destabilization	2	20	0.023590601	CREBBP, EP300	10	51	19256	75.51372549	0.997185119	0.232131514	0.215146281
48h_vs_Control	GOTERM_BP_DIRECT	GO:0034644~cellular response to UV	2	20	0.02724585	CREBBP, EP300	10	59	19256	65.27457627	0.998881179	0.257787654	0.238925143
48h_vs_Control	GOTERM_BP_DIRECT	GO:0016573~histone acetylation	2	20	0.032251955	CREBBP, EP300	10	70	19256	55.01714286	0.999685568	0.28128566	0.260703783
48h_vs_Control	GOTERM_BP_DIRECT	GO:0050679~positive regulation of epithelial cell proliferation	2	20	0.033159692	LAMB1, LAMC1	10	72	19256	53.48888889	0.999750387	0.28128566	0.260703783
48h_vs_Control	GOTERM_BP_DIRECT	GO:0043627~response to estrogen	2	20	0.033159692	EP300, BRCA1	10	72	19256	53.48888889	0.999750387	0.28128566	0.260703783
48h_vs_Control	GOTERM_BP_DIRECT	GO:0048511~rhythmic process	2	20	0.035425723	CREBBP, EP300	10	77	19256	50.01558442	0.999859855	0.290490926	0.269235492
48h_vs_Control	GOTERM_BP_DIRECT	GO:0008544~epidermis development	2	20	0.038590235	LAMB3, LAMA3	10	84	19256	45.84761905	0.999937555	0.303600012	0.281385377
48h_vs_Control	GOTERM_BP_DIRECT	GO:0030183~B cell differentiation	2	20	0.039492684	ITGB1, EP300	10	86	19256	44.78139535	0.999950436	0.303600012	0.281385377
48h_vs_Control	GOTERM_BP_DIRECT	GO:0045893~positive regulation of transcription, DNA-templated	3	30	0.041786906	CREBBP, EP300, BRCA1	10	716	19256	8.068156425	0.999972478	0.311502387	0.288709529
48h_vs_Control	GOTERM_BP_DIRECT	GO:0046718~viral entry into host cell	2	20	0.046237091	ITGB1, ITGA2	10	101	19256	38.13069307	0.999991243	0.334538953	0.310060493
48h_vs_Control	GOTERM_CC_DIRECT	GO:0008305~integrin complex	3	30	0.0000646	ITGB1, ITGA2, ITGA1	10	28	20472	219.3428571	0.00502303	0.005035525	0.004196271
48h_vs_Control	GOTERM_CC_DIRECT	GO:0005604~basement membrane	3	30	0.000735	LAMA3, LAMB1, LAMC1	10	94	20472	65.33617021	0.055764134	0.014690288	0.012241907
48h_vs_Control	GOTERM_CC_DIRECT	GO:0034665~integrin alpha1-beta1 complex	2	20	0.000879	ITGB1, ITGA1	10	2	20472	2047.2	0.066298264	0.014690288	0.012241907
48h_vs_Control	GOTERM_CC_DIRECT	GO:0005606~laminin-1 complex	2	20	0.001318359	LAMB1, LAMC1	10	3	20472	1364.8	0.097782685	0.014690288	0.012241907
48h_vs_Control	GOTERM_CC_DIRECT	GO:0034666~integrin alpha2-beta1 complex	2	20	0.001318359	ITGB1, ITGA2	10	3	20472	1364.8	0.097782685	0.014690288	0.012241907
48h_vs_Control	GOTERM_CC_DIRECT	GO:0005610~laminin-5 complex	2	20	0.001318359	LAMB3, LAMA3	10	3	20472	1364.8	0.097782685	0.014690288	0.012241907
48h_vs_Control	GOTERM_CC_DIRECT	GO:0043259~laminin-10 complex	2	20	0.001318359	LAMB1, LAMC1	10	3	20472	1364.8	0.097782685	0.014690288	0.012241907
48h_vs_Control	GOTERM_CC_DIRECT	GO:0016020~membrane	6	60	0.002423348	ITGB1, ITGA2, LAMA3, ITGA1, LAMB1, LAMC1	10	2547	20472	4.822614841	0.172420858	0.023627642	0.019689701
48h_vs_Control	GOTERM_CC_DIRECT	GO:0043256~laminin complex	2	20	0.003073768	LAMB3, LAMB1	10	7	20472	584.9142857	0.213469003	0.026639324	0.022199437
48h_vs_Control	GOTERM_CC_DIRECT	GO:0098637~protein complex involved in cell-matrix adhesion	2	20	0.003950444	LAMB1, LAMC1	10	9	20472	454.9333333	0.265631879	0.030813461	0.025677884
48h_vs_Control	GOTERM_CC_DIRECT	GO:0045178~basal part of cell	2	20	0.007013414	ITGA2, ITGA1	10	16	20472	255.9	0.42245773	0.049731481	0.041442901
48h_vs_Control	GOTERM_CC_DIRECT	GO:0070062~extracellular exosome	5	50	0.011056706	ITGB1, LAMA3, ITGA1, LAMB1, LAMC1	10	2218	20472	4.61496844	0.579884782	0.071868588	0.05989049
48h_vs_Control	GOTERM_CC_DIRECT	GO:0000123~histone acetyltransferase complex	2	20	0.012679583	CREBBP, EP300	10	29	20472	141.1862069	0.630398934	0.076077496	0.063397913
48h_vs_Control	GOTERM_CC_DIRECT	GO:0005925~focal adhesion	3	30	0.013991226	ITGB1, ITGA2, ITGA1	10	424	20472	14.48490566	0.666803215	0.077951116	0.064959264
48h_vs_Control	GOTERM_CC_DIRECT	GO:0009897~external side of plasma membrane	3	30	0.01606745	ITGB1, ITGA2, ITGA1	10	456	20472	13.46842105	0.717319673	0.083550739	0.069625616
48h_vs_Control	GOTERM_CC_DIRECT	GO:0009986~cell surface	3	30	0.030188328	ITGB1, ITGA2, ITGA1	10	638	20472	9.626332288	0.90845856	0.147168097	0.122640081
48h_vs_Control	GOTERM_CC_DIRECT	GO:0048471~perinuclear region of cytoplasm	3	30	0.041968327	ITGB1, ITGA2, LAMB1	10	763	20472	8.049279161	0.964711789	0.19256056	0.160467133
48h_vs_Control	GOTERM_MF_DIRECT	GO:0005178~integrin binding	5	50	0.00000063	ITGB1, ITGA2, LAMA3, ITGA1, LAMB1	10	161	18811	58.41925466	0.0000409	0.0000409	0.0000315
48h_vs_Control	GOTERM_MF_DIRECT	GO:0098639~collagen binding involved in cell-matrix adhesion	3	30	0.00000203	ITGB1, ITGA2, ITGA1	10	5	18811	1128.66	0.000132	0.0000661	0.0000508
48h_vs_Control	GOTERM_MF_DIRECT	GO:0005201~extracellular matrix structural constituent	4	40	0.0000314	LAMB3, LAMA3, LAMB1, LAMC1	10	138	18811	54.52463768	0.002040205	0.000681	0.000524
48h_vs_Control	GOTERM_MF_DIRECT	GO:0003684~damaged DNA binding	3	30	0.000497	CREBBP, EP300, BRCA1	10	71	18811	79.48309859	0.03180114	0.008077436	0.006213413
48h_vs_Control	GOTERM_MF_DIRECT	GO:0034212~peptide N-acetyltransferase activity	2	20	0.000957	CREBBP, EP300	10	2	18811	1881.1	0.060318403	0.012436885	0.009566834
48h_vs_Control	GOTERM_MF_DIRECT	GO:0061733~peptide-lysine-N-acetyltransferase activity	2	20	0.003344834	CREBBP, EP300	10	7	18811	537.4571429	0.195696515	0.031384797	0.024142151
48h_vs_Control	GOTERM_MF_DIRECT	GO:0005198~structural molecule activity	3	30	0.003379901	LAMB3, LAMA3, LAMB1	10	187	18811	30.17807487	0.197533916	0.031384797	0.024142151
48h_vs_Control	GOTERM_MF_DIRECT	GO:0046872~metal ion binding	6	60	0.004188003	ITGB1, CREBBP, ITGA2, ITGA1, EP300, BRCA1	10	2642	18811	4.271990916	0.238748754	0.034027525	0.026175019
48h_vs_Control	GOTERM_MF_DIRECT	GO:0003713~transcription coactivator activity	3	30	0.006330483	CREBBP, EP300, BRCA1	10	258	18811	21.87325581	0.338198307	0.045720152	0.035169347
48h_vs_Control	GOTERM_MF_DIRECT	GO:0016407~acetyltransferase activity	2	20	0.008105916	CREBBP, EP300	10	17	18811	221.3058824	0.41082476	0.052688457	0.040529582
48h_vs_Control	GOTERM_MF_DIRECT	GO:0043236~laminin binding	2	20	0.012373594	ITGB1, ITGA2	10	26	18811	144.7	0.554830863	0.073116692	0.056243609
48h_vs_Control	GOTERM_MF_DIRECT	GO:0004402~histone acetyltransferase activity	2	20	0.015209637	CREBBP, EP300	10	32	18811	117.56875	0.630728028	0.078514044	0.060395418
48h_vs_Control	GOTERM_MF_DIRECT	GO:0044877~macromolecular complex binding	3	30	0.015702809	ITGB1, LAMB3, ITGA2	10	414	18811	13.63115942	0.642557673	0.078514044	0.060395418
48h_vs_Control	GOTERM_MF_DIRECT	GO:0001223~transcription coactivator binding	2	20	0.020860016	CREBBP, EP300	10	44	18811	85.50454545	0.745954747	0.096850072	0.074500056
48h_vs_Control	GOTERM_MF_DIRECT	GO:0016746~transferase activity, transferring acyl groups	2	20	0.025078869	EP300, BRCA1	10	53	18811	70.98490566	0.808125859	0.108675097	0.083596229
48h_vs_Control	GOTERM_MF_DIRECT	GO:0005518~collagen binding	2	20	0.032074393	ITGA2, ITGA1	10	68	18811	55.32647059	0.879848646	0.127966384	0.09843568
48h_vs_Control	GOTERM_MF_DIRECT	GO:0002039~p53 binding	2	20	0.033468131	CREBBP, EP300	10	71	18811	52.98873239	0.890591368	0.127966384	0.09843568
48h_vs_Control	GOTERM_MF_DIRECT	GO:0001618~virus receptor activity	2	20	0.035787065	ITGB1, ITGA2	10	76	18811	49.50263158	0.906407301	0.129231067	0.099408513
48h_vs_Control	GOTERM_MF_DIRECT	GO:0031490~chromatin DNA binding	2	20	0.039025263	CREBBP, EP300	10	83	18811	45.32771084	0.924789565	0.133507478	0.10269806
48h_vs_Control	KEGG_PATHWAY	hsa05165:Human papillomavirus infection	9	90	5.89E-11	ITGB1, CREBBP, LAMB3, ITGA2, LAMA3, ITGA1, EP300, LAMB1, LAMC1	10	331	8156	22.17643505	3.41E-09	3.15E-09	2.66E-09
48h_vs_Control	KEGG_PATHWAY	hsa04512:ECM-receptor interaction	7	70	1.09E-10	ITGB1, LAMB3, ITGA2, LAMA3, ITGA1, LAMB1, LAMC1	10	88	8156	64.87727273	6.3E-09	3.15E-09	2.66E-09
48h_vs_Control	KEGG_PATHWAY	hsa04151:PI3K-Akt signaling pathway	8	80	9.15E-09	ITGB1, LAMB3, ITGA2, LAMA3, ITGA1, LAMB1, BRCA1, LAMC1	10	354	8156	18.43163842	0.00000053	0.000000177	0.000000149
48h_vs_Control	KEGG_PATHWAY	hsa04510:Focal adhesion	7	70	1.64E-08	ITGB1, LAMB3, ITGA2, LAMA3, ITGA1, LAMB1, LAMC1	10	201	8156	28.4039801	0.000000953	0.000000231	0.000000195
48h_vs_Control	KEGG_PATHWAY	hsa05222:Small cell lung cancer	6	60	1.99E-08	ITGB1, LAMB3, ITGA2, LAMA3, LAMB1, LAMC1	10	92	8156	53.19130435	0.00000115	0.000000231	0.000000195
48h_vs_Control	KEGG_PATHWAY	hsa05200:Pathways in cancer	8	80	0.000000153	ITGB1, CREBBP, LAMB3, ITGA2, LAMA3, EP300, LAMB1, LAMC1	10	531	8156	12.28775895	0.00000888	0.00000148	0.00000125
48h_vs_Control	KEGG_PATHWAY	hsa05145:Toxoplasmosis	5	50	0.00000403	ITGB1, LAMB3, LAMA3, LAMB1, LAMC1	10	112	8156	36.41071429	0.000234	0.0000334	0.0000282
48h_vs_Control	KEGG_PATHWAY	hsa05146:Amoebiasis	4	40	0.000151	LAMB3, LAMA3, LAMB1, LAMC1	10	102	8156	31.98431373	0.008723282	0.001095111	0.000925
48h_vs_Control	KEGG_PATHWAY	hsa05412:Arrhythmogenic right ventricular cardiomyopathy	3	30	0.003034206	ITGB1, ITGA2, ITGA1	10	77	8156	31.77662338	0.161592883	0.019553772	0.016519566
48h_vs_Control	KEGG_PATHWAY	hsa05410:Hypertrophic cardiomyopathy	3	30	0.004122266	ITGB1, ITGA2, ITGA1	10	90	8156	27.18666667	0.213046092	0.023909144	0.020199104
48h_vs_Control	KEGG_PATHWAY	hsa05414:Dilated cardiomyopathy	3	30	0.004677394	ITGB1, ITGA2, ITGA1	10	96	8156	25.4875	0.238088843	0.024662625	0.020835666
48h_vs_Control	KEGG_PATHWAY	hsa04810:Regulation of actin cytoskeleton	3	30	0.022620703	ITGB1, ITGA2, ITGA1	10	218	8156	11.22385321	0.734746043	0.109333396	0.092367869
48h_vs_Control	KEGG_PATHWAY	hsa05206:MicroRNAs in cancer	3	30	0.043444279	-	10	310	8156	7.892903226	0.923933075	0.193828322	0.163751513
