# Supplementary material for: A Novel Phenazine Analog, CPUL1, Suppresses Autophagic Flux and Proliferation in Hepatocellular Carcinoma: Insight from Integrated Transcriptomic and Metabolomic Analysis
Source: Cancers (Basel). 2023 Mar 5;15(5):1607. doi: 10.3390/cancers15051607 (PMC10001020; doi:10.3390/cancers15051607)
Supplement: Supplementary file 1 [file cancers-15-01607-s001.zip › Supplementary File S4.xls]

## Sheet: 52个
Ion modes	Average Rt(min)	Average Mz	KEGG ID	Formula	VIP（6h）	P value(6h)	FC(6h)
F+	6.865	414.037	C09592	C22H23NO7	1.28383	4.20092e-07	2477.06
F+	4.787	212.082	C18759	C11H14ClNO	1.32496	2.19002e-08	260.842
F+	6.814	510.318	C10807	C27H43NO8	1.31445	7.47135e-08	137.636
F+	7.617	386.046	C18731	C14H13F4N3O2S	1.27408	9.03785e-07	112.35
F-	7.046	633.292	C06540	C35H42N2O9	1.24803	4.87068e-06	97.3137
F-	0.958	264.106	C00378	[C12H17N4OS]+	1.28723	4.21014e-06	83.3368
F+	10.349	439.319	C03963	C27H44O3	1.34463	2.19454e-09	78.0197
F-	7.442	517.274	C07667	C30H30O8	1.25173	3.03216e-06	66.9532
F+	6.796	468.271	C00397	C18H37N5O9	1.2721	1.05715e-06	56.991
F+	10.745	415.388	C01753	C29H50O	1.06318	0.00173868	35.9849
F+	6.902	413.057	C10183	C19H18O8	1.11595	0.000208971	27.6747
F+	6.583	383.047	C05153	C18H16O7	1.21817	1.18318e-05	26.4906
F-	2.915	445.119	C10025	C21H18O11	1.24461	1.88354e-05	20.8746
F-	0.821	445.084	C09795	C18H22O11S	1.21771	4.7016e-05	18.288
F-	8.709	371.135	C01533	C17H24O9	1.30664	2.76365e-07	15.0155
F+	1.32	288.107	C09238	C18H13N3O	1.26158	1.94539e-05	12.8279
F+	0.849	567.055	C00052	C15H24N2O17P2	1.21991	2.56158e-05	12.7706
F+	0.953	535.212	C16915	C27H34O11	1.28354	8.30522e-06	11.5152
F-	10.933	378.231	C10645	C23H25NO4	1.14133	0.00016083	9.58081
F-	2.916	413.102	C09769	C18H22O11	1.26098	9.49267e-06	8.2487
F+	8.672	502.293	D00671	C32H40ClNO4	1.28825	4.29895e-07	7.93799
F+	8.677	546.259	D08956	C29H39NO9	1.34545	4.21113e-09	7.23627
F+	9.672	298.273	C11124	C18H35NO2	1.2828	4.54557e-07	6.91905
F-	6.643	386.008	C00705	C9H15N3O10P2	1.27838	5.36667e-07	6.7856
F+	0.903	291.156	C00523	C19H30O2	1.33366	2.33586e-08	6.20741
F+	8.139	339.185	C08503	C18H26O6	1.0883	0.000385048	6.00578
F+	5.577	172.133	D00332	C9H17NO2	1.19943	2.51132e-05	5.74532
F+	0.831	447.094	C03951	C21H20O11	1.15946	0.000462755	5.63723
F-	7.803	473.067	C10437	C22H18O12	1.00071	0.00194486	5.62965
F+	0.863	425.114	C10112	C21H22O8	1.18513	0.000191786	4.91763
F+	5.989	308.09	C10643	C16H15NO4	1.2017	2.22969e-05	4.8995
F-	6.134	442.021	C00035	C10H15N5O11P2	1.18412	2.79088e-05	4.86444
F+	0.952	362.141	C06533	C20H21NO4	1.26783	1.42099e-05	4.69548
F+	8.819	596.389	C08580	C40H52O4	1.03252	0.0015224	4.55838
F+	0.836	264.012	C14228	C8H10NO5PS	1.17236	0.000115834	4.51159
F+	10.742	481.36	C08980	C30H50O3	1.07014	0.00116779	4.20621
F+	0.826	222.029	C18891	C11H8ClNO2	1.13028	0.000162673	4.11856
F-	10.065	347.257	C10759	C22H36O3	1.06758	0.00079919	4.09512
F+	10.788	417.332	C08913	C27H44O3	1.05765	0.00133248	4.07719
F-	0.892	220.03	C18570	C10H8ClN3O	1.18077	4.5178e-05	3.46191
F-	4.138	116.05	C00581	C3H7N3O2	1.31229	3.74652e-07	3.33576
F+	9.76	282.249	C06830	C17H32BrNO2	1.29044	5.98299e-07	3.25203
F-	4.138	159.093	C00398	C10H12N2	1.25552	2.21386e-05	2.99438
F+	11.522	397.311	C14156	C27H40O2	1.22228	3.38133e-05	2.98685
F+	8.05	359.258	C14658	C23H34O3	1.12641	0.000165446	2.96624
F+	7.963	501.309	C11758	C26H44O9	1.20251	1.91266e-05	2.9523
F+	0.886	441.103	C10305	C21H22O9	1.28956	3.59954e-06	2.7511
F-	4.83	178.051	C01586	C9H9NO3	1.30584	1.28341e-06	2.72395
F-	1.929	219.077	C01017	C11H12N2O3	1.28541	2.52771e-06	2.18353
F-	0.89	329.109	C18791	C18H19ClN2O2	1.03201	0.00489988	2.01951
F+	0.763	220.933	C00794	C6H14O6	1.09499	0.00608663	2.01816
F+	4.121	305.018	C01617	C15H12O7	1.22798	8.18209e-05	2.00739
F+	10.477	503.305	C08819	C27H44O7	1.17396	0.000191983	0.499824
F+	0.845	140.068	C00719	C5H11NO2	1.14573	0.000116704	0.499803
F-	4.35	440.133	C00504	C19H19N7O6	1.26858	8.25535e-07	0.498928
F-	0.905	80.9737	C00094	H2O3S	1.1044	0.000252601	0.49864
F+	0.98	173.041	C09908	C10H14O	1.18776	0.000214902	0.498082
F-	0.918	275.018	C00345	C6H13O10P	1.01392	0.00227066	0.497868
F+	11.324	305.248	C00712	C18H34O2	1.23191	6.32308e-06	0.497703
F-	0.89	124.007	C00245	C2H7NO3S	1.25995	1.55563e-06	0.497483
F+	10.913	393.296	C04483	C24H40O4	1.30065	2.17166e-07	0.497468
F-	0.878	248.863	C14521	C6H4Br2O	1.04107	0.00187574	0.495329
F+	0.911	337.161	C17567	C19H24NO3+	1.2875	4.97916e-06	0.494039
F+	2.154	160.075	C00637	C10H9NO	1.13568	0.000449508	0.493859
F+	0.951	915.171	C09972	C44H34O22	1.0268	0.00119522	0.49376
F+	9.662	445.077	C16979	C19H18O11	1.23345	1.35734e-05	0.493659
F+	1.321	102.055	C01234	C4H7NO2	1.2963	8.63469e-07	0.493484
F-	1.074	217.993	C03360	C6H6NO6P	1.22839	2.32074e-05	0.491664
F-	0.895	165.041	C16357	C6H6N4O2	1.29294	2.92872e-07	0.491603
F+	5.471	335.109	C05551	C16H18N2O4S	1.03096	0.00449396	0.490789
F+	7.423	308.186	D07548	C17H26ClNO4	1.10122	0.00108313	0.490453
F+	8.491	163.039	C09315	C9H6O3	1.18243	6.4587e-05	0.489729
F+	1.333	254.052	C07315	C10H11N3O3S	1.23693	7.5483e-06	0.488816
F+	1.329	159.025	C00262	C5H4N4O	1.24126	3.23376e-05	0.488229
F-	1.63	88.0382	C00133	C3H7NO2	1.29851	6.40311e-07	0.486919
F-	4.787	121.029	C06202	C7H6O2	1.30789	8.59898e-08	0.486689
F-	0.967	111.02	C00106	C4H4N2O2	1.24022	6.36794e-05	0.485751
F+	5.857	175.132	C06213	C11H14N2	1.24554	5.40963e-06	0.485662
F+	0.783	234.181	D04924	C15H24ClNO	1.14008	0.00038952	0.4838
F+	0.847	219.026	C07480	C7H8N4O2	1.21863	9.98771e-05	0.483765
F+	8.964	410.308	C10829	C27H39NO2	1.21249	1.60082e-05	0.482903
F+	0.837	171.016	C00093	C3H9O6P	1.25942	4.68661e-06	0.48238
F+	1.319	134.045	C00049	C4H7NO4	1.31707	2.94941e-07	0.480051
F-	5.677	241.108	C01727	C12H10N4O2	1.30554	1.11777e-07	0.479532
F-	5.103	201.114	C08277	C10H18O4	1.1045	0.000549021	0.47575
F+	11.033	369.185	C04555	C19H28O5S	1.34495	3.83776e-09	0.475688
F-	9.418	271.224	C18218	C16H32O3	1.30588	4.45197e-07	0.47376
F+	11.033	326.164	C10350	C16H23NO6	1.36215	8.1124e-10	0.473237
F+	9.569	74.0592	C03134	C3H7NO	1.15702	9.1425e-05	0.471258
F-	1.363	421.1	C10077	C19H18O11	1.27212	1.34137e-06	0.470646
F+	12.683	233.079	C02325	C11H14O4	1.15513	0.000109919	0.469992
F+	9.779	388.212	D08639	C22H29NO5	1.16383	7.29848e-05	0.469377
F-	13.933	346.052	C00020	C10H14N5O7P	1.05916	0.00074528	0.466729
F-	13.953	323.028	C00105	C9H13N2O9P	1.05264	0.000684661	0.466074
F+	1.342	148.06	C00025	C5H9NO4	1.09293	0.000786469	0.465235
F+	1.318	385.127	C00021	C14H20N6O5S	1.30066	3.51773e-07	0.463111
F-	0.966	133.014	C00149	C4H6O5	1.3476	1.44151e-09	0.46097
F+	5.358	355.065	C12600	C19H14O5S	1.27692	5.91549e-06	0.460593
F+	10.31	609.338	C06539	C33H40N2O9	1.01795	0.00246948	0.457395
F+	9.668	360.18	C10363	C18H27NO5	1.07599	0.000438132	0.449124
F+	0.819	590.749	C14536	C16H12O5	1.23611	2.0222e-05	0.447584
F-	11.508	291.233	C12525	C19H32O2	1.04999	0.00364077	0.445136
F+	5.679	265.069	C00386	C9H14N4O3	1.31375	2.15284e-07	0.444545
F+	10.659	189.112	C08261	C9H16O4	1.20755	2.08519e-05	0.444001
F+	6.606	479.342	C17148	C30H48O3	1.15914	0.000252988	0.442229
F-	0.98	330.054	C01608	C15H13N3O4S	1.30672	1.48711e-07	0.440515
F-	11.333	403.16	C10511	C25H24O5	1.17493	3.59572e-05	0.4346
F-	11.333	303.232	C00219	C20H32O2	1.27071	7.78333e-07	0.434167
F-	1.572	203.049	C10702	C13H16O2	1.14967	0.000105984	0.433825
F+	1.327	330.072	C00051	C10H17N3O6S	1.32857	1.58001e-07	0.429998
F+	1.676	153.04	C00385	C5H4N4O2	1.23199	7.42028e-05	0.428042
F-	11.165	434.232	C13782	C27H33NO4	1.02725	0.00139098	0.42635
F-	0.905	168.982	C00111	C3H7O6P	1.08952	0.00037306	0.426185
F+	0.932	362.086	C07502	C12H21NO8S	1.28742	8.71947e-07	0.425937
F-	0.966	331.043	C12633	C16H12O8	1.13436	0.000342766	0.420514
F+	1.791	152.056	C00242	C5H5N5O	1.28311	2.52413e-06	0.42038
F-	5.493	309.104	C09528	C15H18O7	1.17284	0.000436816	0.41964
F+	1.075	89.0703	C02632	C4H8O2	1.19495	3.24538e-05	0.419441
F-	10.354	213.186	C17076	C13H26O2	1.12909	0.000301958	0.417084
F-	11.245	393.136	C10076	C23H22O6	1.20746	1.42008e-05	0.416876
F-	13.476	199	C00279	C4H9O7P	1.11407	0.000215534	0.415784
F-	1.445	435.12	C09099	C21H22O10	1.30317	2.02006e-07	0.414868
F-	5.706	302.142	C05324	C12H21N3O6	1.22505	1.86393e-05	0.414702
F-	1.711	283.069	C01762	C10H12N4O6	1.25041	2.64939e-05	0.414064
F+	9.679	390.215	D01692	C19H28ClN5O4	1.12749	0.000189402	0.41354
F-	0.912	130.062	C00300	C4H9N3O2	1.35072	1.86472e-10	0.412049
F+	11.147	488.391	C13044	C27H50O6	1.11171	0.00036163	0.411742
F+	0.845	155.041	C00230	C7H6O4	1.34616	1.05704e-08	0.409733
F+	0.924	112.049	C00380	C4H5N3O	1.2482	7.73072e-06	0.409623
F-	0.858	326.76	C14454	C6H3Br3O	1.15138	0.000310939	0.408345
F-	0.883	210.065	C07224	C12H9N3O	1.32677	9.40552e-09	0.405193
F+	13.555	287.221	C19615	C16H30O4	1.05929	0.000794088	0.403645
F+	4.579	233.096	C05079	C12H12N2O3	1.11959	0.000225637	0.402266
F+	8.434	288.2	C11848	C16H21NO2	1.22353	2.22947e-05	0.401696
F-	1.253	133.014	C00497	C4H6O5	1.34559	1.23618e-09	0.400082
F+	1.319	158.044	C00147	C5H5N5	1.34607	4.37534e-09	0.3996
F+	10.77	279.16	C14214	C16H22O4	1.20098	6.2433e-05	0.398982
F-	6.013	316.159	C10166	C17H19NO5	1.268	2.82803e-06	0.396642
F+	0.952	268.107	C00212	C10H13N5O4	1.01231	0.00159595	0.396467
F-	1.641	282.084	C00387	C10H13N5O5	1.18187	3.51614e-05	0.395565
F-	1.353	145.013	C00026	C5H6O5	1.11797	0.000683677	0.395347
F-	3.451	686.14	C00882	C21H35N7O13P2S	1.20357	1.3401e-05	0.393405
F+	7.867	300.289	C00319	C18H37NO2	1.14354	0.000124751	0.391905
F+	0.943	361.18	C18476	C17H22ClN3O	1.31327	9.53133e-08	0.389539
F-	1.984	160.044	C06342	C9H7NO2	1.32685	4.20615e-08	0.385648
F+	0.919	244.091	C00475	C9H13N3O5	1.2076	3.87947e-05	0.384676
F-	0.791	975.374	C08589	C44H64O24	1.05981	0.000887492	0.384537
F+	1.419	190.071	C00624	C7H11NO5	1.35761	5.74113e-10	0.381577
F-	3.893	174.058	C00954	C10H9NO2	1.34046	1.27091e-08	0.381092
F+	1.684	285.08	C17039	C16H12O5	1.2942	1.91844e-06	0.380899
F-	11.162	283.243	C01530	C18H36O2	1.27106	6.16162e-07	0.379007
F-	0.891	294.046	C13061	C12H13N3O4S	1.33168	3.85215e-09	0.378558
F+	0.977	176.038	C01042	C6H9NO5	1.26377	1.65032e-06	0.377688
F-	11.072	277.217	C06427	C18H30O2	1.07041	0.000472137	0.377013
F+	1.946	252.065	C12819	C10H15NO4	1.09132	0.000376498	0.375133
F+	0.87	170.096	C11016	C12H11N	1.12381	0.000183317	0.373311
F+	0.937	368.026	C00942	C10H12N5O7P	1.15062	0.00032616	0.373112
F+	12.248	283.263	C01712	C18H34O2	1.3207	1.31398e-07	0.372281
F-	5.859	216.106	C10614	C13H15NO2	1.33494	1.49794e-08	0.371157
F-	0.884	174.089	C00327	C6H13N3O3	1.26415	5.98573e-06	0.369376
F+	6.694	469.108	C05376	C22H22O10	1.05549	0.00184512	0.368378
F+	11.017	348.286	C16512	C18H37NO2	1.37014	6.73679e-11	0.366835
F-	7.234	351.216	C04853	C20H32O5	1.25137	1.30713e-05	0.363864
F+	3.885	159.048	C01551	C4H6N4O3	1.33913	2.74505e-08	0.363857
F-	1.354	147.03	C02612	C5H8O5	1.33392	3.20094e-08	0.36293
F-	12.254	281.248	C08367	C18H34O2	1.35266	4.1912e-10	0.361458
F+	7.267	260.166	D02689	C16H21NO2	1.2811	1.08153e-06	0.359099
F+	1.315	124.038	C00253	C6H5NO2	1.32568	3.20007e-08	0.357142
F-	0.856	792.427	C10815	C41H63NO14	1.10221	0.00106223	0.356905
F-	4.181	374.151	C07661	C19H22FN3O4	1.05023	0.00169028	0.350208
F+	5.313	272.129	C09165	C16H14O3	1.14621	0.000187189	0.344555
F-	1.364	378.095	C03451	C13H21N3O8S	1.23923	3.40836e-06	0.343354
F-	1.024	190.93	C00296	C7H12O6	1.32427	5.77398e-08	0.338759
F-	11.622	279.23	C01595	C18H32O2	1.12032	0.00018751	0.338294
F+	10.669	149.095	C17690	C10H14O2	1.31261	2.20563e-07	0.336804
F+	11.15	385.166	C10893	C22H24O6	1.15435	0.000105701	0.336171
F+	0.946	230.113	C14425	C12H17NO2	1.2348	1.05079e-05	0.336166
F+	8.958	167.033	C01606	C8H6O4	1.33595	2.77098e-08	0.334101
F+	9.749	336.074	C04109	C15H10O8	1.20183	2.45881e-05	0.333442
F-	1.542	231.013	C18428	C9H10Cl2N2O	1.3209	2.89664e-08	0.332579
F+	1.103	278.98	C01420	C6H12N2O4S2	1.34053	8.03596e-09	0.328159
F+	4.961	295.127	C11045	C14H18N2O5	1.17644	6.54741e-05	0.32592
F+	5.473	160.041	D00663	C20H23BrN2O4	1.13654	0.000388733	0.325518
F+	0.948	282.119	C02494	C11H15N5O4	1.32414	4.43099e-08	0.324719
F-	6.083	359.123	C17957	C18H16O8	1.18256	2.69507e-05	0.323744
F-	0.927	166.017	C03722	C7H5NO4	1.34309	1.06488e-09	0.315891
F-	1.364	204.031	C02470	C10H7NO4	1.27795	4.67745e-07	0.312532
F+	0.852	340.024	C11156	C14H16ClN3O2	1.34473	4.81343e-09	0.303382
F+	0.846	236.04	D03273	C7H16ClNO3	1.31522	2.04305e-07	0.298421
F+	10.31	623.316	C09654	C38H42N2O6	1.2496	1.97897e-05	0.29828
F-	10.272	373.117	C11673	C16H22O10	1.2869	2.85593e-07	0.297798
F+	8.979	487.337	C08972	C30H46O5	1.14337	0.000385284	0.297262
F-	12.495	269.246	C00468	C18H22O2	1.31054	5.37957e-08	0.293354
F+	10.66	133.101	C06576	C10H14O	1.35877	1.50129e-10	0.292539
F+	7.218	579.161	C12627	C27H30O14	1.08258	0.000475987	0.290575
F-	1.354	191.019	C00158	C6H8O7	1.3582	4.65943e-11	0.289523
F+	6.031	255.064	C10208	C15H10O4	1.00587	0.00210964	0.288742
F+	0.976	157.01	C00711	C4H6O5	1.17341	8.19935e-05	0.287794
F+	1.671	151.061	C00310	C5H10O5	1.29604	1.57121e-06	0.277112
F+	1.358	213.12	C06538	C13H12N2O	1.21712	4.21015e-05	0.268556
F-	1.644	601.15	C17519	C29H30O14	1.05164	0.000702133	0.265058
F-	1.348	112.041	C00791	C4H7N3O	1.29044	2.96596e-07	0.263263
F+	5.465	352.13	C02717	C18H19NO4	1.01178	0.00251587	0.259724
F+	1.474	215.046	C13700	C10H11ClO3	1.22761	6.77953e-06	0.25969
F-	5.923	539.084	C17781	C28H28O11	1.29145	6.48019e-07	0.25811
F-	1.145	247.037	C18462	C12H6F2N2O2	1.01061	0.00158035	0.251937
F+	7.569	387.18	C10561	C22H26O6	1.22847	6.91727e-06	0.236267
F+	1.502	251.071	C00669	C8H14N2O5S	1.25361	2.32727e-06	0.233855
F+	10.659	337.2	C00757	[C20H18NO4]+	1.31333	7.00956e-08	0.233551
F+	0.945	162.075	C01077	C6H11NO4	1.29363	2.62414e-07	0.230337
F+	6.503	379.301	C06545	C24H40N2	1.02224	0.00159874	0.227786
F+	0.947	204.122	C02571	C9H18NO4	1.34441	7.94729e-09	0.225898
F+	5.322	336.165	D05726	C15H21N5O4	1.36177	7.75566e-10	0.217946
F+	5.785	166.105	C02057	C9H11NO2	1.18714	4.2961e-05	0.21489
F-	5.51	343.087	C10040	C18H16O7	1.16218	0.00013813	0.214652
F+	4.376	174.058	C06556	C5H8ClN5	1.36881	6.08196e-11	0.207924
F-	1.337	155.007	C00295	C5H4N2O4	1.29227	3.89128e-07	0.207391
F+	0.904	203.151	C03626	C8H18N4O2	1.29952	3.31361e-07	0.204986
F-	5.485	305.094	D00322	C13H12F2N6O	1.03364	0.00336878	0.199254
F-	5.091	259.021	C02965	C6H13O9P	1.30962	5.84014e-08	0.193355
F-	4.39	148.042	C01733	C5H11NO2S	1.35354	1.95517e-10	0.182641
F-	3.328	357.088	C17071	C16H22O9	1.36726	1.9483e-11	0.180344
F-	9.353	434.913	C11099	C12H4Cl2F6N4OS	1.22436	6.08739e-06	0.159832
F-	8.469	269.215	C10023	C15H10O5	1.23038	6.74207e-06	0.144109
F+	5.911	160.04	C01004	C7H7NO2	1.20668	2.46122e-05	0.123046
F-	4.989	202.109	C04083	C10H13N5	1.19976	2.95628e-05	0.11196
F+	0.759	133.097	C01602	C5H12N2O2	1.37786	1.70229e-12	0.107164
F-	0.766	313.048	C07590	C17H14O4S	1.29037	1.75619e-07	0.0604045
F-	5.792	482.085	C08495	C15H21N3O15	1.01055	0.0013787	0.051091

## Sheet: 59个
Ion modes	Average Rt(min)	Average Mz	KEGG ID	Formula	VIP（6h）	P value(6h)	FC(6h)
F-	4.138	116.05	C00581	C3H7N3O2	1.31229	3.74652e-07	3.33576
F-	4.138	159.093	C00398	C10H12N2	1.25552	2.21386e-05	2.99438
F-	4.83	178.051	C01586	C9H9NO3	1.30584	1.28341e-06	2.72395
F-	4.8	210.067	C07224	C12H9N3O	1.31579	3.8881e-08	1991.23
F-	1.929	219.077	C01017	C11H12N2O3	1.28541	2.52771e-06	2.18353
F-	0.892	220.03	C18570	C10H8ClN3O	1.18077	4.5178e-05	3.46191
F-	0.958	264.106	C00378	[C12H17N4OS]+	1.28723	4.21014e-06	83.3368
F-	10.932	271.228	C18218	C16H32O3	1.27251	1.12414e-06	9.97589
F-	0.89	329.109	C18791	C18H19ClN2O2	1.03201	0.00489988	2.01951
F-	10.065	347.257	C10759	C22H36O3	1.06758	0.00079919	4.09512
F-	8.709	371.135	C01533	C17H24O9	1.30664	2.76365e-07	15.0155
F-	10.933	378.231	C10645	C23H25NO4	1.14133	0.00016083	9.58081
F-	6.643	386.008	C00705	C9H15N3O10P2	1.27838	5.36667e-07	6.7856
F-	2.916	413.102	C09769	C18H22O11	1.26098	9.49267e-06	8.2487
F-	6.134	442.021	C00035	C10H15N5O11P2	1.18412	2.79088e-05	4.86444
F-	0.821	445.084	C09795	C18H22O11S	1.21771	4.7016e-05	18.288
F-	2.915	445.119	C10025	C21H18O11	1.24461	1.88354e-05	20.8746
F-	7.803	473.067	C10437	C22H18O12	1.00071	0.00194486	5.62965
F-	7.442	517.274	C07667	C30H30O8	1.25173	3.03216e-06	66.9532
F-	7.046	633.292	C06540	C35H42N2O9	1.24803	4.87068e-06	97.3137
F+	5.577	172.133	D00332	C9H17NO2	1.19943	2.51132e-05	5.74532
F+	4.787	212.082	C18759	C11H14ClNO	1.32496	2.19002e-08	260.842
F+	0.763	220.933	C00794	C6H14O6	1.09499	0.00608663	2.01816
F+	0.826	222.029	C18891	C11H8ClNO2	1.13028	0.000162673	4.11856
F+	0.836	264.012	C14228	C8H10NO5PS	1.17236	0.000115834	4.51159
F+	9.846	281.248	C01595	C18H32O2	1.32521	2.94854e-08	5.3905
F+	9.76	282.249	C06830	C17H32BrNO2	1.29044	5.98299e-07	3.25203
F+	1.32	288.107	C09238	C18H13N3O	1.26158	1.94539e-05	12.8279
F+	0.903	291.156	C00523	C19H30O2	1.33366	2.33586e-08	6.20741
F+	9.672	298.273	C11124	C18H35NO2	1.2828	4.54557e-07	6.91905
F+	8.792	301.216	C06427	C18H30O2	1.25455	3.51538e-06	4.30641
F+	4.121	305.018	C01617	C15H12O7	1.22798	8.18209e-05	2.00739
F+	9.253	305.248	C00219	C20H32O2	1.20442	2.10772e-05	2.42386
F+	5.989	308.09	C10643	C16H15NO4	1.2017	2.22969e-05	4.8995
F+	8.139	339.185	C08503	C18H26O6	1.0883	0.000385048	6.00578
F+	8.05	359.258	C14658	C23H34O3	1.12641	0.000165446	2.96624
F+	0.952	362.141	C06533	C20H21NO4	1.26783	1.42099e-05	4.69548
F+	5.99	368.033	C00942	C10H12N5O7P	1.1153	0.000281412	116.697
F+	6.583	383.047	C05153	C18H16O7	1.21817	1.18318e-05	26.4906
F+	7.617	386.046	C18731	C14H13F4N3O2S	1.27408	9.03785e-07	112.35
F+	11.522	397.311	C14156	C27H40O2	1.22228	3.38133e-05	2.98685
F+	6.902	413.057	C10183	C19H18O8	1.11595	0.000208971	27.6747
F+	6.865	414.037	C09592	C22H23NO7	1.28383	4.20092e-07	2477.06
F+	10.745	415.388	C01753	C29H50O	1.06318	0.00173868	35.9849
F+	10.788	417.332	C08913	C27H44O3	1.05765	0.00133248	4.07719
F+	5.027	422.195	C10511	C25H24O5	1.18694	0.00013725	4.85869
F+	0.863	425.114	C10112	C21H22O8	1.18513	0.000191786	4.91763
F+	10.349	439.319	C03963	C27H44O3	1.34463	2.19454e-09	78.0197
F+	0.886	441.103	C10305	C21H22O9	1.28956	3.59954e-06	2.7511
F+	0.831	447.094	C03951	C21H20O11	1.15946	0.000462755	5.63723
F+	6.796	468.271	C00397	C18H37N5O9	1.2721	1.05715e-06	56.991
F+	10.742	481.36	C08980	C30H50O3	1.07014	0.00116779	4.20621
F+	7.963	501.309	C11758	C26H44O9	1.20251	1.91266e-05	2.9523
F+	8.672	502.293	D00671	C32H40ClNO4	1.28825	4.29895e-07	7.93799
F+	6.814	510.318	C10807	C27H43NO8	1.31445	7.47135e-08	137.636
F+	0.953	535.212	C16915	C27H34O11	1.28354	8.30522e-06	11.5152
F+	8.677	546.259	D08956	C29H39NO9	1.34545	4.21113e-09	7.23627
F+	0.849	567.055	C00052	C15H24N2O17P2	1.21991	2.56158e-05	12.7706
F+	8.819	596.389	C08580	C40H52O4	1.03252	0.0015224	4.55838
F-	0.905	80.9737	C00094	H2O3S	1.1044	0.000252601	0.49864
F-	1.63	88.0382	C00133	C3H7NO2	1.29851	6.40311e-07	0.486919
F-	0.967	111.02	C00106	C4H4N2O2	1.24022	6.36794e-05	0.485751
F-	1.348	112.041	C00791	C4H7N3O	1.29044	2.96596e-07	0.263263
F-	4.787	121.029	C06202	C7H6O2	1.30789	8.59898e-08	0.486689
F-	0.89	124.007	C00245	C2H7NO3S	1.25995	1.55563e-06	0.497483
F-	0.912	130.062	C00300	C4H9N3O2	1.35072	1.86472e-10	0.412049
F-	1.253	133.014	C00497	C4H6O5	1.34559	1.23618e-09	0.400082
F-	0.966	133.014	C00149	C4H6O5	1.3476	1.44151e-09	0.46097
F-	1.353	145.013	C00026	C5H6O5	1.11797	0.000683677	0.395347
F-	1.354	147.03	C02612	C5H8O5	1.33392	3.20094e-08	0.36293
F-	4.39	148.042	C01733	C5H11NO2S	1.35354	1.95517e-10	0.182641
F-	1.337	155.007	C00295	C5H4N2O4	1.29227	3.89128e-07	0.207391
F-	1.984	160.044	C06342	C9H7NO2	1.32685	4.20615e-08	0.385648
F-	0.895	165.041	C16357	C6H6N4O2	1.29294	2.92872e-07	0.491603
F-	0.927	166.017	C03722	C7H5NO4	1.34309	1.06488e-09	0.315891
F-	0.905	168.982	C00111	C3H7O6P	1.08952	0.00037306	0.426185
F-	3.893	174.058	C00954	C10H9NO2	1.34046	1.27091e-08	0.381092
F-	0.884	174.089	C00327	C6H13N3O3	1.26415	5.98573e-06	0.369376
F-	1.024	190.93	C00296	C7H12O6	1.32427	5.77398e-08	0.338759
F-	1.354	191.019	C00158	C6H8O7	1.3582	4.65943e-11	0.289523
F-	13.476	199	C00279	C4H9O7P	1.11407	0.000215534	0.415784
F-	5.103	201.114	C08277	C10H18O4	1.1045	0.000549021	0.47575
F-	4.989	202.109	C04083	C10H13N5	1.19976	2.95628e-05	0.11196
F-	1.572	203.049	C10702	C13H16O2	1.14967	0.000105984	0.433825
F-	1.364	204.031	C02470	C10H7NO4	1.27795	4.67745e-07	0.312532
F-	10.354	213.186	C17076	C13H26O2	1.12909	0.000301958	0.417084
F-	5.859	216.106	C10614	C13H15NO2	1.33494	1.49794e-08	0.371157
F-	1.074	217.993	C03360	C6H6NO6P	1.22839	2.32074e-05	0.491664
F-	1.542	231.013	C18428	C9H10Cl2N2O	1.3209	2.89664e-08	0.332579
F-	5.677	241.108	C01727	C12H10N4O2	1.30554	1.11777e-07	0.479532
F-	1.145	247.037	C18462	C12H6F2N2O2	1.01061	0.00158035	0.251937
F-	0.878	248.863	C14521	C6H4Br2O	1.04107	0.00187574	0.495329
F-	5.091	259.021	C02965	C6H13O9P	1.30962	5.84014e-08	0.193355
F-	8.469	269.215	C10023	C15H10O5	1.23038	6.74207e-06	0.144109
F-	12.495	269.246	C00468	C18H22O2	1.31054	5.37957e-08	0.293354
F-	0.918	275.018	C00345	C6H13O10P	1.01392	0.00227066	0.497868
F-	12.254	281.248	C08367	C18H34O2	1.35266	4.1912e-10	0.361458
F-	1.641	282.084	C00387	C10H13N5O5	1.18187	3.51614e-05	0.395565
F-	1.711	283.069	C01762	C10H12N4O6	1.25041	2.64939e-05	0.414064
F-	11.162	283.243	C01530	C18H36O2	1.27106	6.16162e-07	0.379007
F-	11.508	291.233	C12525	C19H32O2	1.04999	0.00364077	0.445136
F-	0.891	294.046	C13061	C12H13N3O4S	1.33168	3.85215e-09	0.378558
F-	5.706	302.142	C05324	C12H21N3O6	1.22505	1.86393e-05	0.414702
F-	5.485	305.094	D00322	C13H12F2N6O	1.03364	0.00336878	0.199254
F-	5.493	309.104	C09528	C15H18O7	1.17284	0.000436816	0.41964
F-	0.766	313.048	C07590	C17H14O4S	1.29037	1.75619e-07	0.0604045
F-	6.013	316.159	C10166	C17H19NO5	1.268	2.82803e-06	0.396642
F-	13.953	323.028	C00105	C9H13N2O9P	1.05264	0.000684661	0.466074
F-	0.858	326.76	C14454	C6H3Br3O	1.15138	0.000310939	0.408345
F-	0.98	330.054	C01608	C15H13N3O4S	1.30672	1.48711e-07	0.440515
F-	0.966	331.043	C12633	C16H12O8	1.13436	0.000342766	0.420514
F-	5.51	343.087	C10040	C18H16O7	1.16218	0.00013813	0.214652
F-	13.933	346.052	C00020	C10H14N5O7P	1.05916	0.00074528	0.466729
F-	7.234	351.216	C04853	C20H32O5	1.25137	1.30713e-05	0.363864
F-	3.328	357.088	C17071	C16H22O9	1.36726	1.9483e-11	0.180344
F-	6.083	359.123	C17957	C18H16O8	1.18256	2.69507e-05	0.323744
F-	10.272	373.117	C11673	C16H22O10	1.2869	2.85593e-07	0.297798
F-	4.181	374.151	C07661	C19H22FN3O4	1.05023	0.00169028	0.350208
F-	1.364	378.095	C03451	C13H21N3O8S	1.23923	3.40836e-06	0.343354
F-	11.245	393.136	C10076	C23H22O6	1.20746	1.42008e-05	0.416876
F-	1.363	421.1	C10077	C19H18O11	1.27212	1.34137e-06	0.470646
F-	11.165	434.232	C13782	C27H33NO4	1.02725	0.00139098	0.42635
F-	9.353	434.913	C11099	C12H4Cl2F6N4OS	1.22436	6.08739e-06	0.159832
F-	1.445	435.12	C09099	C21H22O10	1.30317	2.02006e-07	0.414868
F-	4.35	440.133	C00504	C19H19N7O6	1.26858	8.25535e-07	0.498928
F-	5.792	482.085	C08495	C15H21N3O15	1.01055	0.0013787	0.051091
F-	5.923	539.084	C17781	C28H28O11	1.29145	6.48019e-07	0.25811
F-	1.644	601.15	C17519	C29H30O14	1.05164	0.000702133	0.265058
F-	3.451	686.14	C00882	C21H35N7O13P2S	1.20357	1.3401e-05	0.393405
F-	0.856	792.427	C10815	C41H63NO14	1.10221	0.00106223	0.356905
F-	0.791	975.374	C08589	C44H64O24	1.05981	0.000887492	0.384537
F+	9.569	74.0592	C03134	C3H7NO	1.15702	9.1425e-05	0.471258
F+	1.075	89.0703	C02632	C4H8O2	1.19495	3.24538e-05	0.419441
F+	1.321	102.055	C01234	C4H7NO2	1.2963	8.63469e-07	0.493484
F+	0.924	112.049	C00380	C4H5N3O	1.2482	7.73072e-06	0.409623
F+	1.315	124.038	C00253	C6H5NO2	1.32568	3.20007e-08	0.357142
F+	0.759	133.097	C01602	C5H12N2O2	1.37786	1.70229e-12	0.107164
F+	10.66	133.101	C06576	C10H14O	1.35877	1.50129e-10	0.292539
F+	1.319	134.045	C00049	C4H7NO4	1.31707	2.94941e-07	0.480051
F+	0.845	140.068	C00719	C5H11NO2	1.14573	0.000116704	0.499803
F+	1.342	148.06	C00025	C5H9NO4	1.09293	0.000786469	0.465235
F+	10.669	149.095	C17690	C10H14O2	1.31261	2.20563e-07	0.336804
F+	1.671	151.061	C00310	C5H10O5	1.29604	1.57121e-06	0.277112
F+	1.791	152.056	C00242	C5H5N5O	1.28311	2.52413e-06	0.42038
F+	1.676	153.04	C00385	C5H4N4O2	1.23199	7.42028e-05	0.428042
F+	0.845	155.041	C00230	C7H6O4	1.34616	1.05704e-08	0.409733
F+	0.976	157.01	C00711	C4H6O5	1.17341	8.19935e-05	0.287794
F+	1.319	158.044	C00147	C5H5N5	1.34607	4.37534e-09	0.3996
F+	1.329	159.025	C00262	C5H4N4O	1.24126	3.23376e-05	0.488229
F+	3.885	159.048	C01551	C4H6N4O3	1.33913	2.74505e-08	0.363857
F+	5.911	160.04	C01004	C7H7NO2	1.20668	2.46122e-05	0.123046
F+	5.473	160.041	D00663	C20H23BrN2O4	1.13654	0.000388733	0.325518
F+	2.154	160.075	C00637	C10H9NO	1.13568	0.000449508	0.493859
F+	0.945	162.075	C01077	C6H11NO4	1.29363	2.62414e-07	0.230337
F+	8.491	163.039	C09315	C9H6O3	1.18243	6.4587e-05	0.489729
F+	5.785	166.105	C02057	C9H11NO2	1.18714	4.2961e-05	0.21489
F+	8.958	167.033	C01606	C8H6O4	1.33595	2.77098e-08	0.334101
F+	0.87	170.096	C11016	C12H11N	1.12381	0.000183317	0.373311
F+	0.837	171.016	C00093	C3H9O6P	1.25942	4.68661e-06	0.48238
F+	0.98	173.041	C09908	C10H14O	1.18776	0.000214902	0.498082
F+	4.376	174.058	C06556	C5H8ClN5	1.36881	6.08196e-11	0.207924
F+	5.857	175.132	C06213	C11H14N2	1.24554	5.40963e-06	0.485662
F+	0.977	176.038	C01042	C6H9NO5	1.26377	1.65032e-06	0.377688
F+	10.659	189.112	C08261	C9H16O4	1.20755	2.08519e-05	0.444001
F+	1.419	190.071	C00624	C7H11NO5	1.35761	5.74113e-10	0.381577
F+	0.904	203.151	C03626	C8H18N4O2	1.29952	3.31361e-07	0.204986
F+	0.947	204.122	C02571	C9H18NO4	1.34441	7.94729e-09	0.225898
F+	1.358	213.12	C06538	C13H12N2O	1.21712	4.21015e-05	0.268556
F+	1.474	215.046	C13700	C10H11ClO3	1.22761	6.77953e-06	0.25969
F+	0.847	219.026	C07480	C7H8N4O2	1.21863	9.98771e-05	0.483765
F+	0.946	230.113	C14425	C12H17NO2	1.2348	1.05079e-05	0.336166
F+	12.683	233.079	C02325	C11H14O4	1.15513	0.000109919	0.469992
F+	4.579	233.096	C05079	C12H12N2O3	1.11959	0.000225637	0.402266
F+	0.783	234.181	D04924	C15H24ClNO	1.14008	0.00038952	0.4838
F+	0.846	236.04	D03273	C7H16ClNO3	1.31522	2.04305e-07	0.298421
F+	0.919	244.091	C00475	C9H13N3O5	1.2076	3.87947e-05	0.384676
F+	1.502	251.071	C00669	C8H14N2O5S	1.25361	2.32727e-06	0.233855
F+	1.946	252.065	C12819	C10H15NO4	1.09132	0.000376498	0.375133
F+	1.333	254.052	C07315	C10H11N3O3S	1.23693	7.5483e-06	0.488816
F+	6.031	255.064	C10208	C15H10O4	1.00587	0.00210964	0.288742
F+	7.267	260.166	D02689	C16H21NO2	1.2811	1.08153e-06	0.359099
F+	5.679	265.069	C00386	C9H14N4O3	1.31375	2.15284e-07	0.444545
F+	0.952	268.107	C00212	C10H13N5O4	1.01231	0.00159595	0.396467
F+	5.313	272.129	C09165	C16H14O3	1.14621	0.000187189	0.344555
F+	1.103	278.98	C01420	C6H12N2O4S2	1.34053	8.03596e-09	0.328159
F+	10.77	279.16	C14214	C16H22O4	1.20098	6.2433e-05	0.398982
F+	0.948	282.119	C02494	C11H15N5O4	1.32414	4.43099e-08	0.324719
F+	12.248	283.263	C01712	C18H34O2	1.3207	1.31398e-07	0.372281
F+	1.684	285.08	C17039	C16H12O5	1.2942	1.91844e-06	0.380899
F+	13.555	287.221	C19615	C16H30O4	1.05929	0.000794088	0.403645
F+	8.434	288.2	C11848	C16H21NO2	1.22353	2.22947e-05	0.401696
F+	4.961	295.127	C11045	C14H18N2O5	1.17644	6.54741e-05	0.32592
F+	7.867	300.289	C00319	C18H37NO2	1.14354	0.000124751	0.391905
F+	11.324	305.248	C00712	C18H34O2	1.23191	6.32308e-06	0.497703
F+	7.423	308.186	D07548	C17H26ClNO4	1.10122	0.00108313	0.490453
F+	11.033	326.164	C10350	C16H23NO6	1.36215	8.1124e-10	0.473237
F+	1.327	330.072	C00051	C10H17N3O6S	1.32857	1.58001e-07	0.429998
F+	5.471	335.109	C05551	C16H18N2O4S	1.03096	0.00449396	0.490789
F+	9.749	336.074	C04109	C15H10O8	1.20183	2.45881e-05	0.333442
F+	5.322	336.165	D05726	C15H21N5O4	1.36177	7.75566e-10	0.217946
F+	0.911	337.161	C17567	C19H24NO3+	1.2875	4.97916e-06	0.494039
F+	10.659	337.2	C00757	[C20H18NO4]+	1.31333	7.00956e-08	0.233551
F+	0.852	340.024	C11156	C14H16ClN3O2	1.34473	4.81343e-09	0.303382
F+	11.017	348.286	C16512	C18H37NO2	1.37014	6.73679e-11	0.366835
F+	5.465	352.13	C02717	C18H19NO4	1.01178	0.00251587	0.259724
F+	5.358	355.065	C12600	C19H14O5S	1.27692	5.91549e-06	0.460593
F+	9.668	360.18	C10363	C18H27NO5	1.07599	0.000438132	0.449124
F+	0.943	361.18	C18476	C17H22ClN3O	1.31327	9.53133e-08	0.389539
F+	0.932	362.086	C07502	C12H21NO8S	1.28742	8.71947e-07	0.425937
F+	11.033	369.185	C04555	C19H28O5S	1.34495	3.83776e-09	0.475688
F+	6.503	379.301	C06545	C24H40N2	1.02224	0.00159874	0.227786
F+	1.318	385.127	C00021	C14H20N6O5S	1.30066	3.51773e-07	0.463111
F+	11.15	385.166	C10893	C22H24O6	1.15435	0.000105701	0.336171
F+	7.569	387.18	C10561	C22H26O6	1.22847	6.91727e-06	0.236267
F+	9.779	388.212	D08639	C22H29NO5	1.16383	7.29848e-05	0.469377
F+	9.679	390.215	D01692	C19H28ClN5O4	1.12749	0.000189402	0.41354
F+	10.913	393.296	C04483	C24H40O4	1.30065	2.17166e-07	0.497468
F+	8.964	410.308	C10829	C27H39NO2	1.21249	1.60082e-05	0.482903
F+	9.662	445.077	C16979	C19H18O11	1.23345	1.35734e-05	0.493659
F+	6.694	469.108	C05376	C22H22O10	1.05549	0.00184512	0.368378
F+	6.606	479.342	C17148	C30H48O3	1.15914	0.000252988	0.442229
F+	8.979	487.337	C08972	C30H46O5	1.14337	0.000385284	0.297262
F+	11.147	488.391	C13044	C27H50O6	1.11171	0.00036163	0.411742
F+	10.477	503.305	C08819	C27H44O7	1.17396	0.000191983	0.499824
F+	7.218	579.161	C12627	C27H30O14	1.08258	0.000475987	0.290575
F+	0.819	590.749	C14536	C16H12O5	1.23611	2.0222e-05	0.447584
F+	10.31	609.338	C06539	C33H40N2O9	1.01795	0.00246948	0.457395
F+	10.31	623.316	C09654	C38H42N2O6	1.2496	1.97897e-05	0.29828
F+	0.951	915.171	C09972	C44H34O22	1.0268	0.00119522	0.49376
