# Supplementary material for: A Novel Phenazine Analog, CPUL1, Suppresses Autophagic Flux and Proliferation in Hepatocellular Carcinoma: Insight from Integrated Transcriptomic and Metabolomic Analysis
Source: Cancers (Basel). 2023 Mar 5;15(5):1607. doi: 10.3390/cancers15051607 (PMC10001020; doi:10.3390/cancers15051607)
Supplement: Supplementary file 1 [file cancers-15-01607-s001.zip › Supplementary File S6.xls]

## Sheet: Sheet1
Time	Pathway	Hits	Targets	Type	Regulation
6h	Arginine biosynthesis	C00025	L-Glutamic acid	compound	DOWN
6h	Arginine biosynthesis	C00327	Citrulline	compound	DOWN
6h	Arginine biosynthesis	C00049	L-Aspartic acid	compound	DOWN
6h	Arginine biosynthesis	C00026	Oxoglutaric acid	compound	DOWN
6h	Arginine biosynthesis	C00624	N-Acetylglutamic acid	compound	DOWN
6h	Arginine biosynthesis	2875	GPT	gene	UP
6h	Alanine, aspartate and glutamate metabolism	C01042	N-Acetyl-L-aspartic acid	compound	DOWN
6h	Alanine, aspartate and glutamate metabolism	C00049	L-Aspartic acid	compound	DOWN
6h	Alanine, aspartate and glutamate metabolism	C00025	L-Glutamic acid	compound	DOWN
6h	Alanine, aspartate and glutamate metabolism	C00158	Citric acid	compound	DOWN
6h	Alanine, aspartate and glutamate metabolism	C00026	Oxoglutaric acid	compound	DOWN
6h	Alanine, aspartate and glutamate metabolism	80150	ASRGL1	gene	UP
6h	Alanine, aspartate and glutamate metabolism	2875	GPT	gene	UP
6h	Alanine, aspartate and glutamate metabolism	8659	ALDH4A1	gene	UP
6h	Alanine, aspartate and glutamate metabolism	2673	GFPT1	gene	Down
6h	Glycerolipid metabolism	C00093	Glycerol 3-phosphate	compound	DOWN
6h	Glycerolipid metabolism	C00111	Dihydroxyacetone phosphate	compound	DOWN
6h	Glycerolipid metabolism	84513	PLPP5	gene	UP
6h	Glycerolipid metabolism	26007	TKFC	gene	UP
6h	Glycerolipid metabolism	160851	DGKH	gene	Down
6h	Glycerolipid metabolism	132158	GLYCTK	gene	UP
6h	Purine metabolism	C00035	Guanosine diphosphate	compound	UP
6h	Purine metabolism	C00385	Xanthine	compound	DOWN
6h	Purine metabolism	C00020	Adenosine monophosphate	compound	DOWN
6h	Purine metabolism	C00212	Adenosine	compound	DOWN
6h	Purine metabolism	C01762	Xanthosine	compound	DOWN
6h	Purine metabolism	C00262	Hypoxanthine	compound	DOWN
6h	Purine metabolism	C00242	Guanine	compound	DOWN
6h	Purine metabolism	C00387	Guanosine	compound	DOWN
6h	Purine metabolism	C00942	Cyclic GMP	compound	UP
6h	Purine metabolism	C00147	Adenine	compound	DOWN
6h	Purine metabolism	5139	PDE3A	gene	Down
6h	Purine metabolism	221264	AK9	gene	Down
6h	Purine metabolism	4830	NME1	gene	UP
6h	Purine metabolism	4907	NT5E	gene	Down
6h	Purine metabolism	374659	HDDC3	gene	UP
6h	Purine metabolism	5152	PDE9A	gene	Down
6h	Histidine metabolism	C00025	L-Glutamic acid	compound	DOWN
6h	Histidine metabolism	C00386	Carnosine	compound	DOWN
6h	Histidine metabolism	C00049	L-Aspartic acid	compound	DOWN
6h	Histidine metabolism	4129	MAOB	gene	UP
6h	Histidine metabolism	218	ALDH3A1	gene	UP
6h	Arginine and proline metabolism	C00581	Guanidoacetic acid	compound	UP
6h	Arginine and proline metabolism	C00300	Creatine	compound	DOWN
6h	Arginine and proline metabolism	C00025	L-Glutamic acid	compound	DOWN
6h	Arginine and proline metabolism	548596	CKMT1A	gene	UP
6h	Arginine and proline metabolism	4129	MAOB	gene	UP
6h	Arginine and proline metabolism	54498	SMOX	gene	Down
6h	Arginine and proline metabolism	8659	ALDH4A1	gene	UP
6h	Arginine and proline metabolism	65263	PYCR3	gene	UP
6h	Arginine and proline metabolism	5033	P4HA1	gene	Down
6h	Inositol phosphate metabolism	C00111	Dihydroxyacetone phosphate	compound	DOWN
6h	Inositol phosphate metabolism	8867	SYNJ1	gene	Down
6h	Inositol phosphate metabolism	253430	IPMK	gene	Down
6h	Inositol phosphate metabolism	138429	PIP5KL1	gene	UP
6h	Inositol phosphate metabolism	5330	PLCB2	gene	UP
6h	Inositol phosphate metabolism	5293	PIK3CD	gene	Down
6h	Inositol phosphate metabolism	200576	PIKFYVE	gene	Down
6h	Inositol phosphate metabolism	5286	PIK3C2A	gene	Down
6h	Inositol phosphate metabolism	8867	SYNJ1	gene	Down
6h	Inositol phosphate metabolism	253430	IPMK	gene	Down
6h	Inositol phosphate metabolism	138429	PIP5KL1	gene	UP
6h	Inositol phosphate metabolism	5330	PLCB2	gene	UP
6h	Inositol phosphate metabolism	5293	PIK3CD	gene	Down
6h	Inositol phosphate metabolism	200576	PIKFYVE	gene	Down
6h	Inositol phosphate metabolism	5286	PIK3C2A	gene	Down
48h	Purine metabolism	C00035	Guanosine diphosphate	compound	UP
48h	Purine metabolism	C00385	Xanthine	compound	DOWN
48h	Purine metabolism	C00002	Adenosine triphosphate	compound	DOWN
48h	Purine metabolism	C00020	Adenosine monophosphate	compound	DOWN
48h	Purine metabolism	C00130	Inosinic acid	compound	DOWN
48h	Purine metabolism	C00212	Adenosine	compound	DOWN
48h	Purine metabolism	C05512	Deoxyinosine	compound	DOWN
48h	Purine metabolism	C01762	Xanthosine	compound	DOWN
48h	Purine metabolism	C00144	Guanosine monophosphate	compound	DOWN
48h	Purine metabolism	C00655	Xanthylic acid	compound	DOWN
48h	Purine metabolism	C00262	Hypoxanthine	compound	DOWN
48h	Purine metabolism	C00294	Inosine	compound	DOWN
48h	Purine metabolism	C00242	Guanine	compound	DOWN
48h	Purine metabolism	C00362	2'-Deoxyguanosine 5'-monophosphate	compound	DOWN
48h	Purine metabolism	C00387	Guanosine	compound	DOWN
48h	Purine metabolism	C00942	Cyclic GMP	compound	UP
48h	Purine metabolism	C00147	Adenine	compound	DOWN
48h	Purine metabolism	5139	PDE3A	gene	Down
48h	Purine metabolism	27115	PDE7B	gene	Down
48h	Purine metabolism	5144	PDE4D	gene	Down
48h	Purine metabolism	953	ENTPD1	gene	Down
48h	Purine metabolism	4830	NME1	gene	UP
48h	Purine metabolism	374659	HDDC3	gene	UP
48h	Purine metabolism	5167	ENPP1	gene	Down
48h	Mucin type O-glycan biosynthesis	6482	ST3GAL1	gene	Down
48h	Mucin type O-glycan biosynthesis	114805	GALNT13	gene	Down
48h	Mucin type O-glycan biosynthesis	2589	GALNT1	gene	Down
48h	Mucin type O-glycan biosynthesis	50614	GALNT9	gene	UP
48h	Mucin type O-glycan biosynthesis	51809	GALNT7	gene	Down
48h	Lysine degradation	4297	KMT2A	gene	Down
48h	Lysine degradation	55870	ASH1L	gene	Down
48h	Lysine degradation	55904	KMT2E	gene	Down
48h	Lysine degradation	58508	KMT2C	gene	Down
48h	Lysine degradation	64324	NSD1	gene	Down
48h	Lysine degradation	83852	SETDB2	gene	Down
48h	Lysine degradation	5352	PLOD2	gene	Down
48h	Lysine degradation	29072	SETD2	gene	Down
48h	Pyrimidine metabolism	C00015	Uridine 5'-diphosphate	compound	DOWN
48h	Pyrimidine metabolism	C00105	Uridine 5'-monophosphate	compound	DOWN
48h	Pyrimidine metabolism	C00055	Cytidine monophosphate	compound	DOWN
48h	Pyrimidine metabolism	C00705	dCDP	compound	UP
48h	Pyrimidine metabolism	C00881	Deoxycytidine	compound	DOWN
48h	Pyrimidine metabolism	C00364	5-Thymidylic acid	compound	UP
48h	Pyrimidine metabolism	C00214	Thymidine	compound	DOWN
48h	Pyrimidine metabolism	C00178	Thymine	compound	DOWN
48h	Pyrimidine metabolism	C00295	Orotic acid	compound	DOWN
48h	Pyrimidine metabolism	4830	NME1	gene	UP
48h	Pyrimidine metabolism	953	ENTPD1	gene	Down
48h	Pyrimidine metabolism	5167	ENPP1	gene	Down
