# Supplementary material for: A Novel Phenazine Analog, CPUL1, Suppresses Autophagic Flux and Proliferation in Hepatocellular Carcinoma: Insight from Integrated Transcriptomic and Metabolomic Analysis
Source: Cancers (Basel). 2023 Mar 5;15(5):1607. doi: 10.3390/cancers15051607 (PMC10001020; doi:10.3390/cancers15051607)
Supplement: Supplementary file 1 [file cancers-15-01607-s001.zip › SupplementaryFile S5.xls]

## Sheet: 76个
Ion modes	Average Rt(min)	Average Mz	KEGG ID	Formula	VIP(48h)	P value(48h)	FC(48h)
F+	6.865	414.037	C09592	C22H23NO7	1.77619	1.53875e-16	4808.22
F-	4.8	210.067	C07224	C12H9N3O	1.60943	1.62621e-18	3475.14
F+	4.787	212.082	C18759	C11H14ClNO	1.76974	3.5249e-14	501.669
F+	7.617	386.046	C18731	C14H13F4N3O2S	1.73491	2.66969e-10	228.789
F-	0.958	264.106	C00378	[C12H17N4OS]+	1.58738	4.74489e-12	175.022
F+	6.814	510.318	C10807	C27H43NO8	1.72914	9.91278e-10	149.14
F-	7.442	517.274	C07667	C30H30O8	1.51649	8.85908e-08	125.843
F+	6.796	468.271	C00397	C18H37N5O9	1.64401	1.01209e-06	104.612
F+	10.745	415.388	C01753	C29H50O	1.07426	0.0173867	96.0733
F-	7.803	473.067	C10437	C22H18O12	1.57634	1.43283e-10	72.7568
F+	6.583	383.047	C05153	C18H16O7	1.7589	1.66645e-12	55.2006
F-	0.821	445.084	C09795	C18H22O11S	1.5722	2.15282e-10	43.309
F+	0.849	567.055	C00052	C15H24N2O17P2	1.69619	1.48093e-08	34.2937
F-	7.046	633.292	C06540	C35H42N2O9	1.27408	0.000378919	31.7919
F+	1.32	288.107	C09238	C18H13N3O	1.70993	5.6067e-09	25.9496
F-	8.709	371.135	C01533	C17H24O9	1.56838	1.37047e-09	24.6784
F+	0.953	535.212	C16915	C27H34O11	1.67444	7.6638e-08	21.3244
F+	0.831	447.094	C03951	C21H20O11	1.72141	2.01062e-09	15.0094
F-	6.643	386.008	C00705	C9H15N3O10P2	1.57774	5.40148e-11	13.3384
F+	8.672	502.293	D00671	C32H40ClNO4	1.76114	2.32978e-12	13.1433
F+	0.863	425.114	C10112	C21H22O8	1.72678	9.52384e-10	12.3728
F-	10.933	378.231	C10645	C23H25NO4	1.4344	4.67534e-06	11.6758
F+	8.677	546.259	D08956	C29H39NO9	1.74185	5.03853e-11	11.1912
F+	0.903	291.156	C00523	C19H30O2	1.74978	1.62822e-11	10.326
F+	0.952	362.141	C06533	C20H21NO4	1.70186	1.11498e-08	9.5577
F+	9.253	305.248	C00219	C20H32O2	1.73634	1.69454e-10	9.11317
F+	9.705	245.228	C02567	C12H28N4O	1.44549	0.000148578	8.28232
F-	10.065	347.257	C10759	C22H36O3	1.33898	0.000144419	7.81022
F+	9.672	298.273	C11124	C18H35NO2	1.70643	6.33962e-09	7.77997
F+	9.552	305.245	C00712	C18H34O2	1.49389	8.37428e-05	7.35073
F+	0.886	441.103	C10305	C21H22O9	1.37154	0.000556902	6.4311
F+	1.335	323.064	C00364	C10H15N2O8P	1.16942	0.0106409	6.27064
F+	9.76	282.249	C06830	C17H32BrNO2	1.70195	1.01799e-08	6.10139
F-	4.64	172.007	C00292	C6H7N	1.34875	0.000275805	5.92605
F+	11.433	471.341	C02283	C30H46O4	1.75778	1.31586e-12	5.45621
F+	8.05	359.258	C14658	C23H34O3	1.71646	3.14649e-09	4.93825
F-	2.915	445.119	C10025	C21H18O11	1.13502	0.00573884	4.92652
F+	10.788	417.332	C08913	C27H44O3	1.49693	5.19533e-05	4.76879
F-	0.944	430.053	C10952	C14H17N5O7S2	1.46682	6.62797e-06	4.76316
F+	7.963	501.309	C11758	C26H44O9	1.37282	0.000844185	4.64313
F+	5.989	308.09	C10643	C16H15NO4	1.67554	1.22734e-07	4.6377
F+	12.169	417.336	C03963	C27H44O3	1.28271	0.00188125	4.54779
F+	10.888	411.216	D00426	C23H27FN4O2	1.49571	4.72971e-05	4.53147
F+	0.751	203.224	C00750	C10H26N4	1.45623	0.000242737	4.36795
F+	10.742	481.36	C08980	C30H50O3	1.27124	0.00231723	4.34247
F-	8.809	564.202	C09464	C27H35NO12	1.54486	9.11369e-09	4.29527
F+	5.027	422.195	C10511	C25H24O5	1.69117	2.11191e-08	4.29345
F+	8.139	339.185	C08503	C18H26O6	1.54033	2.51556e-05	4.17294
F+	0.937	328.056	C11293	C14H15Cl2N3O2	1.63892	1.02487e-06	4.12742
F+	5.577	172.133	D00332	C9H17NO2	1.55379	1.82439e-05	4.04954
F+	0.763	220.933	C00794	C6H14O6	1.22411	0.00367282	4.02681
F+	1.531	455.089	C09126	C21H20O10	1.21332	0.00402616	3.85621
F+	0.949	306.076	C08432	C10H13N5O5	1.58264	4.36443e-06	3.58904
F-	1.353	145.013	C00026	C5H6O5	1.36017	6.10931e-05	3.51023
F+	11.522	397.311	C14156	C27H40O2	1.41117	0.000303695	3.49954
F+	5.535	128.106	C11519	C7H13NO	1.64519	4.58753e-07	3.35026
F+	0.872	216.083	C08272	C10H9N5O	1.28915	0.00136125	3.29094
F-	1.366	189.031	C03474	C9H6N2O3	1.36249	0.000132054	3.15347
F+	1.367	314.091	D04200	C16H12FN3O3	1.17335	0.00786329	2.95939
F+	0.937	351.139	D02149	C13H19NO9	1.61109	2.11438e-06	2.68368
F+	6.871	284.961	C14445	C6H12Cl3O4P	1.2396	0.00283838	2.66731
F-	0.959	611.142	C00127	C20H32N6O12S2	1.56528	7.99935e-10	2.66527
F-	4.138	116.05	C00581	C3H7N3O2	1.44541	4.28398e-06	2.62274
F+	0.698	278.206	C07187	C17H27NO2	1.40707	0.000403481	2.58961
F+	4.631	174.022	C06333	C6H7NO3S	1.44095	0.000180437	2.57373
F-	10.549	271.227	C18218	C16H32O3	1.46335	1.35046e-05	2.49015
F+	4.001	357.284	C02528	C24H40O4	1.26251	0.00273739	2.34726
F-	8.431	412.193	D02418	C22H27N3O5	1.13599	0.00420857	2.33314
F-	9.298	580.221	D01868	C18H39N5O14S	1.54155	8.63364e-09	2.3148
F-	1.929	219.077	C01017	C11H12N2O3	1.48851	4.98047e-07	2.29458
F-	0.924	158.045	C02617	C10H6O2	1.00639	0.0149745	2.15632
F-	4.138	159.093	C00398	C10H12N2	1.3886	2.08641e-05	2.12766
F+	1.523	320.144	C06687	C16H18FN3O3	1.2335	0.00412083	2.10345
F-	7.136	222.087	C02778	C15H13NO	1.2019	0.00266217	2.05118
F+	10.854	415.321	C08898	C27H42O3	1.48519	8.11391e-05	2.04113
F+	0.814	450.833	C17449	C21H22O11	1.20227	0.00663039	2.00258
F+	0.986	104.053	C06555	C2H5N3O2	1.65139	1.14605e-06	0.497637
F-	10.354	213.186	C17076	C13H26O2	1.27383	0.00126024	0.497416
F-	11.072	277.217	C06427	C18H30O2	1.08541	0.00593617	0.493725
F-	7.815	283.265	C01530	C18H36O2	1.09689	0.00442475	0.49039
F-	0.884	174.089	C00327	C6H13N3O3	1.39821	1.59569e-05	0.488822
F-	1.786	125.035	C02835	C5H6N2O2	1.45629	5.56505e-06	0.488515
F-	1.666	135.034	C00262	C5H4N4O	1.50687	3.17971e-07	0.486743
F-	1.405	359.073	C17957	C18H16O8	1.31835	0.000167762	0.486318
F+	9.617	255.231	C10028	C15H10O4	1.11416	0.00897574	0.485885
F+	0.928	131.117	C02714	C6H14N2O	1.53942	1.68362e-05	0.48195
F-	3.524	218.104	C00864	C9H17NO5	1.52713	2.75734e-08	0.479928
F+	0.783	234.181	D04924	C15H24ClNO	1.52898	3.80228e-05	0.475549
F+	0.885	249.073	C09780	C11H14O5	1.56832	1.70133e-05	0.474262
F-	0.889	312.092	C00968	C10H12N5O5P	1.08167	0.0163419	0.473812
F+	0.943	361.18	C18476	C17H22ClN3O	1.59307	4.47746e-06	0.471013
F+	6.503	379.301	C06545	C24H40N2	1.0487	0.0181298	0.466006
F+	1.316	152.055	C00242	C5H5N5O	1.68296	6.21936e-08	0.46513
F-	5.103	201.114	C08277	C10H18O4	1.2308	0.000739344	0.461659
F+	5.09	433.241	C09249	C29H28N4	1.32545	0.000963281	0.461294
F-	1.363	421.1	C10077	C19H18O11	1.44539	3.28999e-06	0.460497
F-	2.906	241.083	C00214	C10H14N2O5	1.54076	1.4725e-08	0.459432
F-	1.451	579.021	C00167	C15H22N2O18P2	1.02612	0.0332856	0.458952
F+	0.87	170.096	C11016	C12H11N	1.37398	0.000487373	0.457071
F-	1.363	307.078	C17934	C14H17ClN4S	1.57722	2.73073e-10	0.455429
F-	7.234	351.216	C04853	C20H32O5	1.37781	3.61289e-05	0.445555
F-	1.358	344.033	C00942	C10H12N5O7P	1.54101	1.3743e-08	0.445331
F+	9.617	287.221	C19615	C16H30O4	1.17196	0.0238431	0.441271
F+	0.854	76.0397	C00037	C2H5NO2	1.56732	1.54172e-05	0.441216
F-	1.63	88.0382	C00133	C3H7NO2	1.53328	5.95279e-08	0.440031
F+	0.951	915.171	C09972	C44H34O22	1.4486	0.000348546	0.438027
F-	0.955	442.008	C00035	C10H15N5O11P2	1.55064	4.85267e-09	0.43039
F+	0.845	155.041	C00230	C7H6O4	1.72552	1.02987e-08	0.424593
F-	12.495	269.246	C00468	C18H22O2	1.44876	2.42915e-06	0.423154
F-	1.348	112.041	C00791	C4H7N3O	1.45514	2.78791e-06	0.417287
F+	1.946	252.065	C12819	C10H15NO4	1.59824	4.27431e-06	0.415977
F-	0.961	481.116	C07610	C25H22O10	1.32166	0.000485426	0.412174
F+	0.728	89.107	C00134	C4H12N2	1.71368	5.15673e-09	0.410866
F-	1.358	309.105	C09528	C15H18O7	1.42532	5.16585e-06	0.410355
F+	3.499	202.107	D00485	C10H16ClNO	1.55737	2.75428e-05	0.40651
F+	1.586	400.183	C07592	C22H25NO6	1.22241	0.0196775	0.406383
F-	0.918	275.018	C00345	C6H13O10P	1.1941	0.00341988	0.405915
F+	1.314	146.091	C01035	C5H11N3O2	1.74014	1.29576e-10	0.405665
F-	1.024	190.93	C00296	C7H12O6	1.32435	0.000256116	0.402337
F+	0.837	171.016	C00093	C3H9O6P	1.62413	1.79637e-06	0.401611
F+	8.979	487.337	C08972	C30H46O5	1.33906	0.00131357	0.401523
F+	1.628	307.044	C10197	C16H12O5	1.62543	7.14765e-06	0.399643
F+	1.318	385.127	C00021	C14H20N6O5S	1.71822	1.59589e-09	0.399457
F+	5.911	160.04	C01004	C7H7NO2	1.33999	0.000811338	0.399014
F+	1.333	254.052	C07315	C10H11N3O3S	1.67581	5.97083e-08	0.398003
F-	1.253	133.014	C00497	C4H6O5	1.53424	1.70112e-07	0.39387
F+	0.922	342.069	C11121	C15H17Cl2N3O2	1.67909	1.16991e-07	0.392818
F-	1.661	267.073	C00294	C10H12N4O5	1.55637	3.33208e-09	0.388473
F+	1.103	278.98	C01420	C6H12N2O4S2	1.71316	1.30498e-08	0.385081
F-	1.445	435.12	C09099	C21H22O10	1.54324	8.76024e-09	0.371736
F+	0.921	213.017	C00493	C7H10O5	1.65736	2.13241e-07	0.371329
F+	4.579	233.096	C05079	C12H12N2O3	1.60247	8.23217e-06	0.370971
F+	4.961	295.127	C11045	C14H18N2O5	1.53459	5.22202e-05	0.370909
F+	0.846	297.969	C07041	C7H8ClN3O4S2	1.67727	2.59125e-07	0.370809
F+	2.059	153.038	C07599	C5H4N4O2	1.40172	0.000443818	0.365523
F+	6.031	255.064	C10208	C15H10O4	1.30102	0.00166466	0.361945
F-	0.91	229.011	C00199	C5H11O8P	1.55881	1.88199e-09	0.35845
F+	1.59	252.109	C08431	C10H13N5O3	1.10001	0.0117742	0.354638
F+	0.846	236.04	D03273	C7H16ClNO3	1.64946	1.40546e-06	0.353794
F+	2.043	127.05	C00178	C5H6N2O2	1.64876	5.30551e-07	0.347531
F-	1.581	431.116	C01714	C21H20O10	1.39048	7.24183e-05	0.34237
F-	1.312	505.987	C00002	C10H16N5O13P3	1.15254	0.00219525	0.341247
F-	1.542	231.013	C18428	C9H10Cl2N2O	1.55235	6.23544e-09	0.33855
F-	5.706	302.142	C05324	C12H21N3O6	1.50255	4.07171e-07	0.337517
F-	6.013	316.159	C10166	C17H19NO5	1.5513	9.51647e-09	0.325047
F-	8.469	269.215	C10023	C15H10O5	1.33287	0.000239633	0.324771
F+	3.496	242.1	C00371	C10H13N5O	1.58261	6.87649e-06	0.323204
F-	1.877	251.077	C05512	C10H12N4O4	1.54721	1.77355e-08	0.322961
F-	1.641	282.084	C00387	C10H13N5O5	1.4808	1.20995e-06	0.319433
F+	4.37	190.05	C01717	C10H7NO3	1.35672	0.000853638	0.317864
F-	0.911	322.047	C00055	C9H14N3O8P	1.50287	3.84592e-07	0.316356
F+	9.467	357.047	C02868	C16H14O7	1.31567	0.00273512	0.314076
F-	0.954	693.116	C00362	C10H14N5O7P	1.47478	1.55025e-06	0.31327
F-	1.572	203.049	C10702	C13H16O2	1.5221	4.5438e-07	0.305878
F-	9.69	624.292	C02166	C30H47N3O9S	1.18684	0.00222418	0.305644
F+	8.434	288.2	C11848	C16H21NO2	1.63687	1.70566e-06	0.301712
F-	1.771	373.099	C10183	C19H18O8	1.55544	3.84332e-09	0.299378
F+	3.496	274.038	D00268	C11H12ClNO3S	1.61695	2.72921e-06	0.297843
F+	5.785	166.105	C02057	C9H11NO2	1.4005	0.000607278	0.29664
F+	11.136	303.194	D07260	C19H26O3	1.07769	0.0157308	0.294177
F-	1.355	631.103	C10176	C16H12O7	1.56183	8.50745e-10	0.290952
F+	0.945	162.075	C01077	C6H11NO4	1.71745	5.92548e-09	0.290297
F+	1.671	151.061	C00310	C5H10O5	1.64328	1.4792e-06	0.2902
F+	0.871	489.112	C00307	C14H26N4O11P2	1.55364	3.83966e-05	0.288901
F-	13.933	346.052	C00020	C10H14N5O7P	1.41222	1.82577e-05	0.28879
F+	7.267	260.166	D02689	C16H21NO2	1.68926	3.96473e-08	0.279561
F+	3.885	159.048	C01551	C4H6N4O3	1.75075	6.7681e-11	0.279251
F-	1.329	323.028	C00105	C9H13N2O9P	1.53045	4.51049e-08	0.277817
F+	0.924	112.049	C00380	C4H5N3O	1.68204	5.02276e-08	0.27579
F-	0.945	198.999	C00279	C4H9O7P	1.14799	0.00469483	0.273493
F-	2.106	341.024	C18547	C18H12Cl2N2O	1.02327	0.00949377	0.271327
F+	0.759	133.097	C01602	C5H12N2O2	1.75228	5.32289e-11	0.262644
F+	0.854	511.093	C00120	C10H16N2O3S	1.57948	1.55151e-05	0.260984
F+	1.309	228.099	C00881	C9H13N3O4	1.55077	2.44856e-05	0.260754
F-	1.539	134.049	C00147	C5H5N5	1.53003	4.19776e-08	0.259004
F-	0.846	403.007	C00015	C9H14N2O12P2	1.06536	0.00596815	0.255385
F-	9.353	434.913	C11099	C12H4Cl2F6N4OS	1.36866	3.33114e-05	0.254773
F-	1.353	362.049	C00144	C10H14N5O8P	1.45411	4.68055e-06	0.252459
F-	1.984	160.044	C06342	C9H7NO2	1.5901	1.4564e-11	0.250445
F-	1.351	346.053	C01367	C10H14N5O7P	1.48289	1.00249e-06	0.243555
F-	1.081	577.206	C16981	C27H30O14	1.23991	0.000610092	0.240645
F-	3.893	174.058	C00954	C10H9NO2	1.59587	1.97508e-12	0.234397
F+	1.676	153.04	C00385	C5H4N4O2	1.70788	3.29995e-08	0.229905
F+	3.624	460.194	D03213	C25H25N5O4	1.69042	1.61526e-07	0.228173
F+	1.474	215.046	C13700	C10H11ClO3	1.6168	1.74117e-06	0.225727
F+	0.885	744.085	C00006	C21H29N7O17P3	1.46236	0.000206808	0.221634
F+	0.932	362.086	C07502	C12H21NO8S	1.70593	7.75192e-09	0.218693
F+	0.948	282.119	C02494	C11H15N5O4	1.73772	5.12357e-10	0.217743
F-	1.354	347.037	C00130	C10H13N4O8P	1.54755	7.52167e-09	0.217209
F+	1.502	251.071	C00669	C8H14N2O5S	1.65149	5.46829e-07	0.211977
F-	1.369	363.035	C00655	C10H13N4O9P	1.49386	4.32864e-07	0.209962
F+	1.358	213.12	C06538	C13H12N2O	1.57494	1.24244e-05	0.205891
F-	1.711	283.069	C01762	C10H12N4O6	1.56864	1.24386e-09	0.200388
F+	0.826	222.029	C18891	C11H8ClNO2	1.60079	3.46028e-06	0.198959
F+	1.684	285.08	C17039	C16H12O5	1.74001	3.23922e-10	0.197245
F+	0.902	187	C00197	C3H7O7P	1.65366	3.28736e-07	0.195463
F-	1.145	247.037	C18462	C12H6F2N2O2	1.32202	0.000116687	0.188388
F-	1.539	266.089	C00212	C10H13N5O4	1.50773	2.18275e-07	0.187247
F+	5.313	272.129	C09165	C16H14O3	1.63762	5.16673e-07	0.186367
F-	3.328	357.088	C17071	C16H22O9	1.58865	5.74412e-12	0.186329
F+	0.88	243.026	C01727	C12H10N4O2	1.59041	6.47022e-06	0.185784
F+	0.904	203.151	C03626	C8H18N4O2	1.68772	2.20248e-07	0.182386
F+	2.055	345.087	C10040	C18H16O7	1.37655	0.00132023	0.182256
F+	0.864	283.02	C10056	C13H8O6	1.65586	3.5166e-07	0.175115
F-	5.859	216.106	C10614	C13H15NO2	1.59135	5.30924e-12	0.172826
F-	0.766	313.048	C07590	C17H14O4S	1.48575	9.26214e-07	0.171469
F-	11.622	279.23	C01595	C18H32O2	1.40782	1.47668e-05	0.165287
F-	4.181	374.151	C07661	C19H22FN3O4	1.34853	0.000187416	0.164149
F-	1.337	155.007	C00295	C5H4N2O4	1.52327	1.11353e-07	0.163141
F-	0.921	166.974	C00074	C3H5O6P	1.49709	3.19486e-07	0.15138
F-	5.091	259.021	C02965	C6H13O9P	1.55433	4.00673e-09	0.15053
F-	5.792	482.085	C08495	C15H21N3O15	1.1436	0.00326781	0.127776
F+	4.376	174.058	C06556	C5H8ClN5	1.76162	4.6685e-12	0.116121
F-	0.911	259.023	C00092	C6H13O9P	1.47769	2.01738e-06	0.109874
F-	1.644	601.15	C17519	C29H30O14	1.39221	3.78303e-05	0.103858
F-	4.958	436.17	C07010	C22H26F3N3OS	1.54551	1.05746e-08	0.087012
F+	5.322	336.165	D05726	C15H21N5O4	1.75735	3.48068e-12	0.0854736
F-	4.989	202.109	C04083	C10H13N5	1.40016	1.5539e-05	0.0829243
F-	5.511	378.167	D00308	C22H22FN3O2	1.11923	0.00310641	0.0642226
F-	2.617	309.058	D01142	C12H14N4O4S	1.34942	7.61913e-05	0.0625645
F-	3.113	267.073	C00858	C16H12O4	1.444	8.76007e-06	0.052928
F-	4.39	148.042	C01733	C5H11NO2S	1.59162	1.05628e-11	0.0364466

## Sheet: 83个
	Average Rt(min)	Average Mz	Formula	VIP(48h)	FC(48h)	tttest(48h)	KEGG
F+	6.865	414.037	C22H23NO7	1.77619	4808.22	1.53875e-16	C09592
F-	4.8	210.067	C12H9N3O	1.60943	3475.14	1.62621e-18	C07224
F+	4.787	212.082	C11H14ClNO	1.76974	501.669	3.5249e-14	C18759
F+	7.617	386.046	C14H13F4N3O2S	1.73491	228.789	2.66969e-10	C18731
F-	0.958	264.106	[C12H17N4OS]+	1.58738	175.022	4.74489e-12	C00378
F+	6.814	510.318	C27H43NO8	1.72914	149.14	9.91278e-10	C10807
F-	7.442	517.274	C30H30O8	1.51649	125.843	8.85908e-08	C07667
F+	6.796	468.271	C18H37N5O9	1.64401	104.612	1.01209e-06	C00397
F+	5.99	368.033	C10H12N5O7P	1.59798	97.9683	2.87077e-06	C00942
F+	10.745	415.388	C29H50O	1.07426	96.0733	0.0173867	C01753
F-	7.803	473.067	C22H18O12	1.57634	72.7568	1.43283e-10	C10437
F+	6.902	413.057	C19H18O8	1.72474	69.8307	1.69368e-09	C10183
F+	6.583	383.047	C18H16O7	1.7589	55.2006	1.66645e-12	C05153
F-	0.821	445.084	C18H22O11S	1.5722	43.309	2.15282e-10	C09795
F+	0.849	567.055	C15H24N2O17P2	1.69619	34.2937	1.48093e-08	C00052
F-	7.046	633.292	C35H42N2O9	1.27408	31.7919	0.000378919	C06540
F+	1.32	288.107	C18H13N3O	1.70993	25.9496	5.6067e-09	C09238
F-	8.709	371.135	C17H24O9	1.56838	24.6784	1.37047e-09	C01533
F+	0.953	535.212	C27H34O11	1.67444	21.3244	7.6638e-08	C16915
F+	0.831	447.094	C21H20O11	1.72141	15.0094	2.01062e-09	C03951
F-	6.643	386.008	C9H15N3O10P2	1.57774	13.3384	5.40148e-11	C00705
F+	8.672	502.293	C32H40ClNO4	1.76114	13.1433	2.32978e-12	D00671
F+	0.863	425.114	C21H22O8	1.72678	12.3728	9.52384e-10	C10112
F-	10.933	378.231	C23H25NO4	1.4344	11.6758	4.67534e-06	C10645
F+	8.677	546.259	C29H39NO9	1.74185	11.1912	5.03853e-11	D08956
F+	0.903	291.156	C19H30O2	1.74978	10.326	1.62822e-11	C00523
F+	0.952	362.141	C20H21NO4	1.70186	9.5577	1.11498e-08	C06533
F+	9.846	281.248	C18H32O2	1.70309	9.25592	1.11531e-08	C01595
F+	9.253	305.248	C20H32O2	1.73634	9.11317	1.69454e-10	C00219
F+	8.792	301.216	C18H30O2	1.73751	8.72113	2.05411e-10	C06427
F+	9.705	245.228	C12H28N4O	1.44549	8.28232	0.000148578	C02567
F-	10.065	347.257	C22H36O3	1.33898	7.81022	0.000144419	C10759
F+	9.672	298.273	C18H35NO2	1.70643	7.77997	6.33962e-09	C11124
F-	6.134	442.021	C10H15N5O11P2	1.4159	7.5701	1.41333e-05	C00035
F+	9.552	305.245	C18H34O2	1.49389	7.35073	8.37428e-05	C00712
F+	0.886	441.103	C21H22O9	1.37154	6.4311	0.000556902	C10305
F+	1.335	323.064	C10H15N2O8P	1.16942	6.27064	0.0106409	C00364
F+	9.76	282.249	C17H32BrNO2	1.70195	6.10139	1.01799e-08	C06830
F+	6.961	400.183	C22H25NO6	1.66627	6.05198	1.2226e-07	C07592
F-	4.64	172.007	C6H7N	1.34875	5.92605	0.000275805	C00292
F+	11.433	471.341	C30H46O4	1.75778	5.45621	1.31586e-12	C02283
F+	8.05	359.258	C23H34O3	1.71646	4.93825	3.14649e-09	C14658
F-	2.915	445.119	C21H18O11	1.13502	4.92652	0.00573884	C10025
F+	10.788	417.332	C27H44O3	1.49693	4.76879	5.19533e-05	C08913
F-	0.944	430.053	C14H17N5O7S2	1.46682	4.76316	6.62797e-06	C10952
F+	7.963	501.309	C26H44O9	1.37282	4.64313	0.000844185	C11758
F+	5.989	308.09	C16H15NO4	1.67554	4.6377	1.22734e-07	C10643
F+	12.169	417.336	C27H44O3	1.28271	4.54779	0.00188125	C03963
F+	10.888	411.216	C23H27FN4O2	1.49571	4.53147	4.72971e-05	D00426
F+	0.751	203.224	C10H26N4	1.45623	4.36795	0.000242737	C00750
F+	10.742	481.36	C30H50O3	1.27124	4.34247	0.00231723	C08980
F-	8.809	564.202	C27H35NO12	1.54486	4.29527	9.11369e-09	C09464
F+	5.027	422.195	C25H24O5	1.69117	4.29345	2.11191e-08	C10511
F+	8.139	339.185	C18H26O6	1.54033	4.17294	2.51556e-05	C08503
F+	0.937	328.056	C14H15Cl2N3O2	1.63892	4.12742	1.02487e-06	C11293
F+	5.577	172.133	C9H17NO2	1.55379	4.04954	1.82439e-05	D00332
F+	0.763	220.933	C6H14O6	1.22411	4.02681	0.00367282	C00794
F+	1.531	455.089	C21H20O10	1.21332	3.85621	0.00402616	C09126
F+	0.949	306.076	C10H13N5O5	1.58264	3.58904	4.36443e-06	C08432
F-	1.353	145.013	C5H6O5	1.36017	3.51023	6.10931e-05	C00026
F+	11.522	397.311	C27H40O2	1.41117	3.49954	0.000303695	C14156
F+	5.535	128.106	C7H13NO	1.64519	3.35026	4.58753e-07	C11519
F+	0.872	216.083	C10H9N5O	1.28915	3.29094	0.00136125	C08272
F-	1.366	189.031	C9H6N2O3	1.36249	3.15347	0.000132054	C03474
F+	11.765	255.231	C15H10O4	1.6864	3.13851	5.78025e-08	C10028
F+	1.367	314.091	C16H12FN3O3	1.17335	2.95939	0.00786329	D04200
F+	0.937	351.139	C13H19NO9	1.61109	2.68368	2.11438e-06	D02149
F+	6.871	284.961	C6H12Cl3O4P	1.2396	2.66731	0.00283838	C14445
F-	0.959	611.142	C20H32N6O12S2	1.56528	2.66527	7.99935e-10	C00127
F-	4.138	116.05	C3H7N3O2	1.44541	2.62274	4.28398e-06	C00581
F+	0.698	278.206	C17H27NO2	1.40707	2.58961	0.000403481	C07187
F+	4.631	174.022	C6H7NO3S	1.44095	2.57373	0.000180437	C06333
F-	10.549	271.227	C16H32O3	1.46335	2.49015	1.35046e-05	C18218
F+	4.001	357.284	C24H40O4	1.26251	2.34726	0.00273739	C02528
F-	8.431	412.193	C22H27N3O5	1.13599	2.33314	0.00420857	D02418
F-	9.298	580.221	C18H39N5O14S	1.54155	2.3148	8.63364e-09	D01868
F-	1.929	219.077	C11H12N2O3	1.48851	2.29458	4.98047e-07	C01017
F-	0.924	158.045	C10H6O2	1.00639	2.15632	0.0149745	C02617
F-	4.138	159.093	C10H12N2	1.3886	2.12766	2.08641e-05	C00398
F+	1.523	320.144	C16H18FN3O3	1.2335	2.10345	0.00412083	C06687
F-	7.136	222.087	C15H13NO	1.2019	2.05118	0.00266217	C02778
F+	10.854	415.321	C27H42O3	1.48519	2.04113	8.11391e-05	C08898
F+	0.814	450.833	C21H22O11	1.20227	2.00258	0.00663039	C17449
F+	0.986	104.053	C2H5N3O2	1.65139	0.497637	1.14605e-06	C06555
F-	10.354	213.186	C13H26O2	1.27383	0.497416	0.00126024	C17076
F-	7.815	283.265	C18H36O2	1.09689	0.49039	0.00442475	C01530
F-	0.884	174.089	C6H13N3O3	1.39821	0.488822	1.59569e-05	C00327
F-	1.786	125.035	C5H6N2O2	1.45629	0.488515	5.56505e-06	C02835
F-	1.666	135.034	C5H4N4O	1.50687	0.486743	3.17971e-07	C00262
F-	1.405	359.073	C18H16O8	1.31835	0.486318	0.000167762	C17957
F+	0.928	131.117	C6H14N2O	1.53942	0.48195	1.68362e-05	C02714
F-	3.524	218.104	C9H17NO5	1.52713	0.479928	2.75734e-08	C00864
F+	0.783	234.181	C15H24ClNO	1.52898	0.475549	3.80228e-05	D04924
F+	0.885	249.073	C11H14O5	1.56832	0.474262	1.70133e-05	C09780
F-	0.889	312.092	C10H12N5O5P	1.08167	0.473812	0.0163419	C00968
F+	0.943	361.18	C17H22ClN3O	1.59307	0.471013	4.47746e-06	C18476
F+	6.503	379.301	C24H40N2	1.0487	0.466006	0.0181298	C06545
F+	1.316	152.055	C5H5N5O	1.68296	0.46513	6.21936e-08	C00242
F-	5.103	201.114	C10H18O4	1.2308	0.461659	0.000739344	C08277
F+	5.09	433.241	C29H28N4	1.32545	0.461294	0.000963281	C09249
F-	1.363	421.1	C19H18O11	1.44539	0.460497	3.28999e-06	C10077
F-	2.906	241.083	C10H14N2O5	1.54076	0.459432	1.4725e-08	C00214
F-	1.451	579.021	C15H22N2O18P2	1.02612	0.458952	0.0332856	C00167
F+	0.87	170.096	C12H11N	1.37398	0.457071	0.000487373	C11016
F-	1.363	307.078	C14H17ClN4S	1.57722	0.455429	2.73073e-10	C17934
F-	7.234	351.216	C20H32O5	1.37781	0.445555	3.61289e-05	C04853
F+	9.617	287.221	C16H30O4	1.17196	0.441271	0.0238431	C19615
F+	0.854	76.0397	C2H5NO2	1.56732	0.441216	1.54172e-05	C00037
F-	1.63	88.0382	C3H7NO2	1.53328	0.440031	5.95279e-08	C00133
F+	0.951	915.171	C44H34O22	1.4486	0.438027	0.000348546	C09972
F+	0.845	155.041	C7H6O4	1.72552	0.424593	1.02987e-08	C00230
F-	12.495	269.246	C18H22O2	1.44876	0.423154	2.42915e-06	C00468
F-	1.348	112.041	C4H7N3O	1.45514	0.417287	2.78791e-06	C00791
F+	1.946	252.065	C10H15NO4	1.59824	0.415977	4.27431e-06	C12819
F-	0.961	481.116	C25H22O10	1.32166	0.412174	0.000485426	C07610
F+	0.728	89.107	C4H12N2	1.71368	0.410866	5.15673e-09	C00134
F-	1.358	309.105	C15H18O7	1.42532	0.410355	5.16585e-06	C09528
F+	3.499	202.107	C10H16ClNO	1.55737	0.40651	2.75428e-05	D00485
F-	0.918	275.018	C6H13O10P	1.1941	0.405915	0.00341988	C00345
F+	1.314	146.091	C5H11N3O2	1.74014	0.405665	1.29576e-10	C01035
F-	1.024	190.93	C7H12O6	1.32435	0.402337	0.000256116	C00296
F+	0.837	171.016	C3H9O6P	1.62413	0.401611	1.79637e-06	C00093
F+	8.979	487.337	C30H46O5	1.33906	0.401523	0.00131357	C08972
F+	1.628	307.044	C16H12O5	1.62543	0.399643	7.14765e-06	C10197
F+	1.318	385.127	C14H20N6O5S	1.71822	0.399457	1.59589e-09	C00021
F+	5.911	160.04	C7H7NO2	1.33999	0.399014	0.000811338	C01004
F+	1.333	254.052	C10H11N3O3S	1.67581	0.398003	5.97083e-08	C07315
F-	1.253	133.014	C4H6O5	1.53424	0.39387	1.70112e-07	C00497
F+	0.922	342.069	C15H17Cl2N3O2	1.67909	0.392818	1.16991e-07	C11121
F-	1.661	267.073	C10H12N4O5	1.55637	0.388473	3.33208e-09	C00294
F+	1.103	278.98	C6H12N2O4S2	1.71316	0.385081	1.30498e-08	C01420
F-	1.445	435.12	C21H22O10	1.54324	0.371736	8.76024e-09	C09099
F+	0.921	213.017	C7H10O5	1.65736	0.371329	2.13241e-07	C00493
F+	4.579	233.096	C12H12N2O3	1.60247	0.370971	8.23217e-06	C05079
F+	4.961	295.127	C14H18N2O5	1.53459	0.370909	5.22202e-05	C11045
F+	0.846	297.969	C7H8ClN3O4S2	1.67727	0.370809	2.59125e-07	C07041
F+	2.059	153.038	C5H4N4O2	1.40172	0.365523	0.000443818	C07599
F+	6.031	255.064	C15H10O4	1.30102	0.361945	0.00166466	C10208
F-	0.91	229.011	C5H11O8P	1.55881	0.35845	1.88199e-09	C00199
F+	1.59	252.109	C10H13N5O3	1.10001	0.354638	0.0117742	C08431
F+	0.846	236.04	C7H16ClNO3	1.64946	0.353794	1.40546e-06	D03273
F+	2.043	127.05	C5H6N2O2	1.64876	0.347531	5.30551e-07	C00178
F-	1.581	431.116	C21H20O10	1.39048	0.34237	7.24183e-05	C01714
F-	1.312	505.987	C10H16N5O13P3	1.15254	0.341247	0.00219525	C00002
F-	1.542	231.013	C9H10Cl2N2O	1.55235	0.33855	6.23544e-09	C18428
F-	5.706	302.142	C12H21N3O6	1.50255	0.337517	4.07171e-07	C05324
F-	6.013	316.159	C17H19NO5	1.5513	0.325047	9.51647e-09	C10166
F-	8.469	269.215	C15H10O5	1.33287	0.324771	0.000239633	C10023
F+	3.496	242.1	C10H13N5O	1.58261	0.323204	6.87649e-06	C00371
F-	1.877	251.077	C10H12N4O4	1.54721	0.322961	1.77355e-08	C05512
F-	1.641	282.084	C10H13N5O5	1.4808	0.319433	1.20995e-06	C00387
F+	4.37	190.05	C10H7NO3	1.35672	0.317864	0.000853638	C01717
F-	0.911	322.047	C9H14N3O8P	1.50287	0.316356	3.84592e-07	C00055
F+	9.467	357.047	C16H14O7	1.31567	0.314076	0.00273512	C02868
F-	0.954	693.116	C10H14N5O7P	1.47478	0.31327	1.55025e-06	C00362
F-	1.572	203.049	C13H16O2	1.5221	0.305878	4.5438e-07	C10702
F-	9.69	624.292	C30H47N3O9S	1.18684	0.305644	0.00222418	C02166
F+	8.434	288.2	C16H21NO2	1.63687	0.301712	1.70566e-06	C11848
F+	3.496	274.038	C11H12ClNO3S	1.61695	0.297843	2.72921e-06	D00268
F+	5.785	166.105	C9H11NO2	1.4005	0.29664	0.000607278	C02057
F+	11.136	303.194	C19H26O3	1.07769	0.294177	0.0157308	D07260
F-	1.355	631.103	C16H12O7	1.56183	0.290952	8.50745e-10	C10176
F+	0.945	162.075	C6H11NO4	1.71745	0.290297	5.92548e-09	C01077
F+	1.671	151.061	C5H10O5	1.64328	0.2902	1.4792e-06	C00310
F+	0.871	489.112	C14H26N4O11P2	1.55364	0.288901	3.83966e-05	C00307
F-	13.933	346.052	C10H14N5O7P	1.41222	0.28879	1.82577e-05	C00020
F+	7.267	260.166	C16H21NO2	1.68926	0.279561	3.96473e-08	D02689
F+	3.885	159.048	C4H6N4O3	1.75075	0.279251	6.7681e-11	C01551
F-	1.329	323.028	C9H13N2O9P	1.53045	0.277817	4.51049e-08	C00105
F+	0.924	112.049	C4H5N3O	1.68204	0.27579	5.02276e-08	C00380
F-	0.945	198.999	C4H9O7P	1.14799	0.273493	0.00469483	C00279
F-	2.106	341.024	C18H12Cl2N2O	1.02327	0.271327	0.00949377	C18547
F+	0.759	133.097	C5H12N2O2	1.75228	0.262644	5.32289e-11	C01602
F+	0.854	511.093	C10H16N2O3S	1.57948	0.260984	1.55151e-05	C00120
F+	1.309	228.099	C9H13N3O4	1.55077	0.260754	2.44856e-05	C00881
F-	1.539	134.049	C5H5N5	1.53003	0.259004	4.19776e-08	C00147
F-	0.846	403.007	C9H14N2O12P2	1.06536	0.255385	0.00596815	C00015
F-	9.353	434.913	C12H4Cl2F6N4OS	1.36866	0.254773	3.33114e-05	C11099
F-	1.353	362.049	C10H14N5O8P	1.45411	0.252459	4.68055e-06	C00144
F-	1.984	160.044	C9H7NO2	1.5901	0.250445	1.4564e-11	C06342
F-	1.351	346.053	C10H14N5O7P	1.48289	0.243555	1.00249e-06	C01367
F-	1.081	577.206	C27H30O14	1.23991	0.240645	0.000610092	C16981
F-	3.893	174.058	C10H9NO2	1.59587	0.234397	1.97508e-12	C00954
F+	1.676	153.04	C5H4N4O2	1.70788	0.229905	3.29995e-08	C00385
F+	3.624	460.194	C25H25N5O4	1.69042	0.228173	1.61526e-07	D03213
F+	1.474	215.046	C10H11ClO3	1.6168	0.225727	1.74117e-06	C13700
F+	0.885	744.085	C21H29N7O17P3	1.46236	0.221634	0.000206808	C00006
F+	0.932	362.086	C12H21NO8S	1.70593	0.218693	7.75192e-09	C07502
F+	0.948	282.119	C11H15N5O4	1.73772	0.217743	5.12357e-10	C02494
F-	1.354	347.037	C10H13N4O8P	1.54755	0.217209	7.52167e-09	C00130
F+	1.502	251.071	C8H14N2O5S	1.65149	0.211977	5.46829e-07	C00669
F-	1.369	363.035	C10H13N4O9P	1.49386	0.209962	4.32864e-07	C00655
F+	1.358	213.12	C13H12N2O	1.57494	0.205891	1.24244e-05	C06538
F-	1.711	283.069	C10H12N4O6	1.56864	0.200388	1.24386e-09	C01762
F+	0.826	222.029	C11H8ClNO2	1.60079	0.198959	3.46028e-06	C18891
F+	1.684	285.08	C16H12O5	1.74001	0.197245	3.23922e-10	C17039
F+	0.902	187	C3H7O7P	1.65366	0.195463	3.28736e-07	C00197
F-	1.145	247.037	C12H6F2N2O2	1.32202	0.188388	0.000116687	C18462
F-	1.539	266.089	C10H13N5O4	1.50773	0.187247	2.18275e-07	C00212
F+	5.313	272.129	C16H14O3	1.63762	0.186367	5.16673e-07	C09165
F-	3.328	357.088	C16H22O9	1.58865	0.186329	5.74412e-12	C17071
F+	0.88	243.026	C12H10N4O2	1.59041	0.185784	6.47022e-06	C01727
F+	0.904	203.151	C8H18N4O2	1.68772	0.182386	2.20248e-07	C03626
F+	2.055	345.087	C18H16O7	1.37655	0.182256	0.00132023	C10040
F+	0.864	283.02	C13H8O6	1.65586	0.175115	3.5166e-07	C10056
F-	5.859	216.106	C13H15NO2	1.59135	0.172826	5.30924e-12	C10614
F-	0.766	313.048	C17H14O4S	1.48575	0.171469	9.26214e-07	C07590
F-	4.181	374.151	C19H22FN3O4	1.34853	0.164149	0.000187416	C07661
F-	1.337	155.007	C5H4N2O4	1.52327	0.163141	1.11353e-07	C00295
F-	0.921	166.974	C3H5O6P	1.49709	0.15138	3.19486e-07	C00074
F-	5.091	259.021	C6H13O9P	1.55433	0.15053	4.00673e-09	C02965
F-	5.792	482.085	C15H21N3O15	1.1436	0.127776	0.00326781	C08495
F+	4.376	174.058	C5H8ClN5	1.76162	0.116121	4.6685e-12	C06556
F-	0.911	259.023	C6H13O9P	1.47769	0.109874	2.01738e-06	C00092
F-	1.644	601.15	C29H30O14	1.39221	0.103858	3.78303e-05	C17519
F-	4.958	436.17	C22H26F3N3OS	1.54551	0.087012	1.05746e-08	C07010
F+	5.322	336.165	C15H21N5O4	1.75735	0.0854736	3.48068e-12	D05726
F-	4.989	202.109	C10H13N5	1.40016	0.0829243	1.5539e-05	C04083
F-	5.511	378.167	C22H22FN3O2	1.11923	0.0642226	0.00310641	D00308
F-	2.617	309.058	C12H14N4O4S	1.34942	0.0625645	7.61913e-05	D01142
F-	3.113	267.073	C16H12O4	1.444	0.052928	8.76007e-06	C00858
F-	4.39	148.042	C5H11NO2S	1.59162	0.0364466	1.05628e-11	C01733
