# Supplementary figures and images for: A Novel Phenazine Analog, CPUL1, Suppresses Autophagic Flux and Proliferation in Hepatocellular Carcinoma: Insight from Integrated Transcriptomic and Metabolomic Analysis
Source: MDPI journal article supplement (doi:10.3390/cancers15051607), 2023-03-05

# mTOR

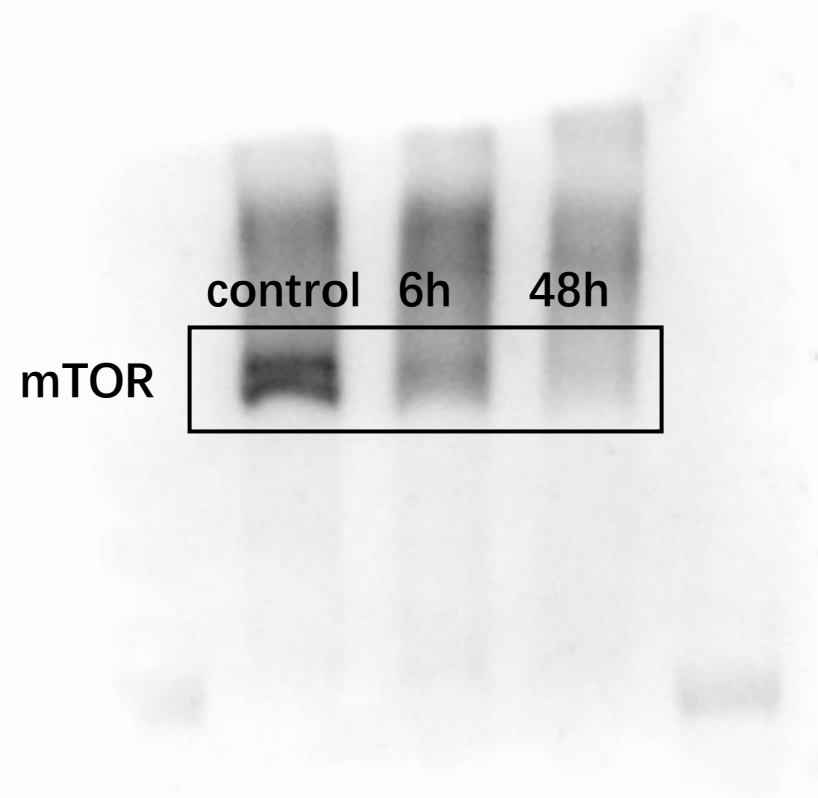

# P-mTOR

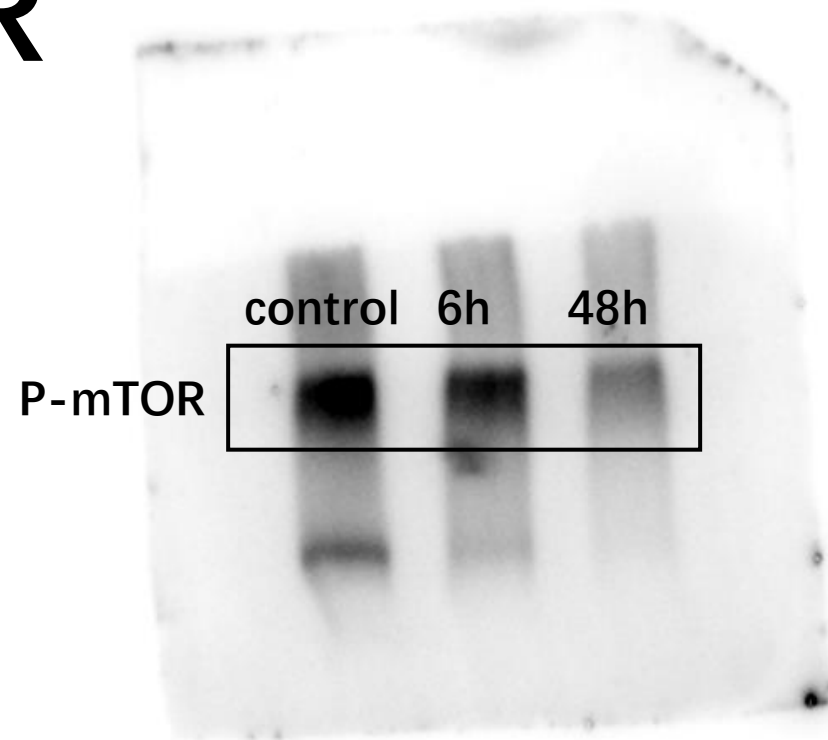

# p62

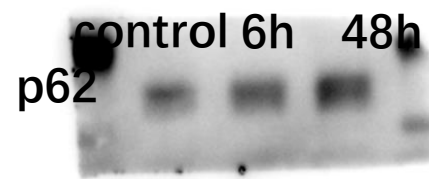

# LC3

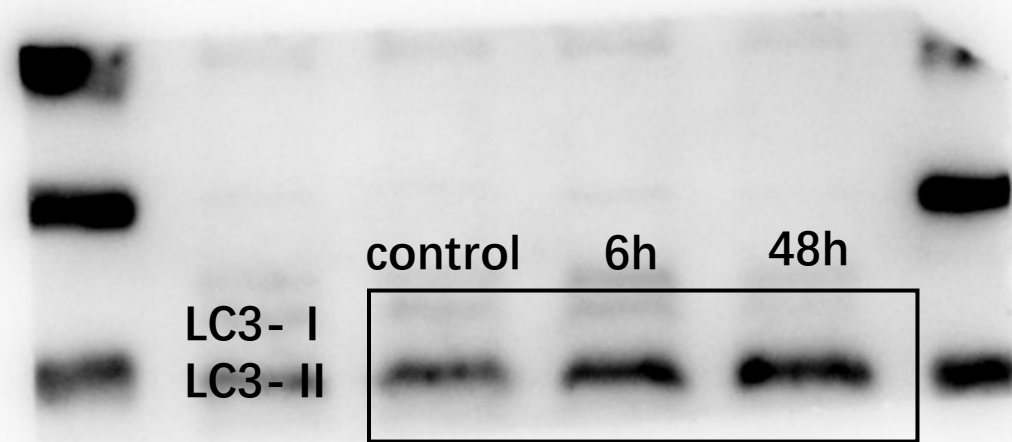

# ATG12

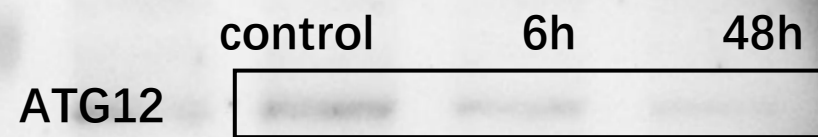

# ATG5

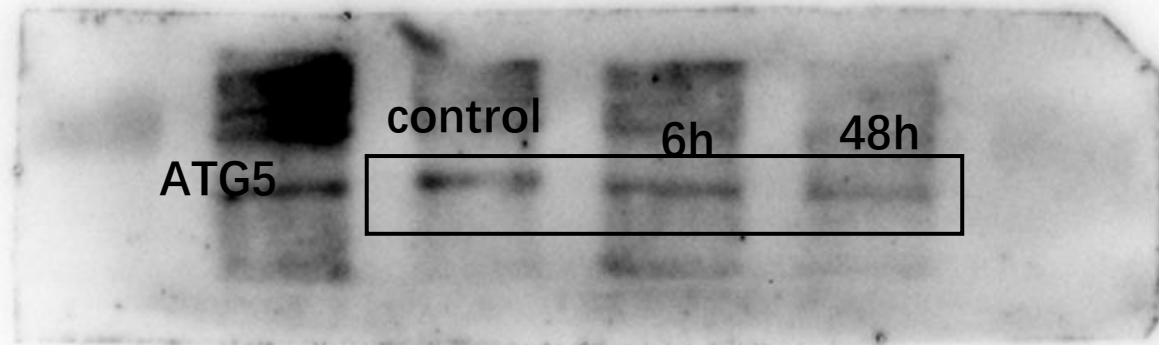

# Beclin1

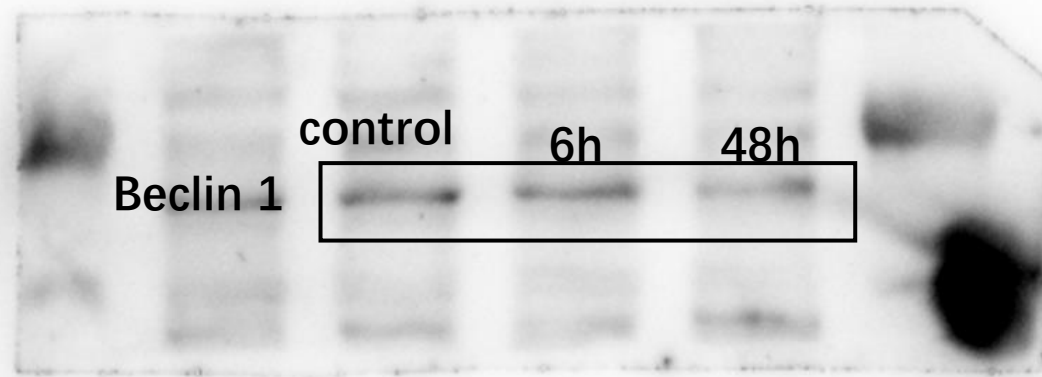

# AMPK

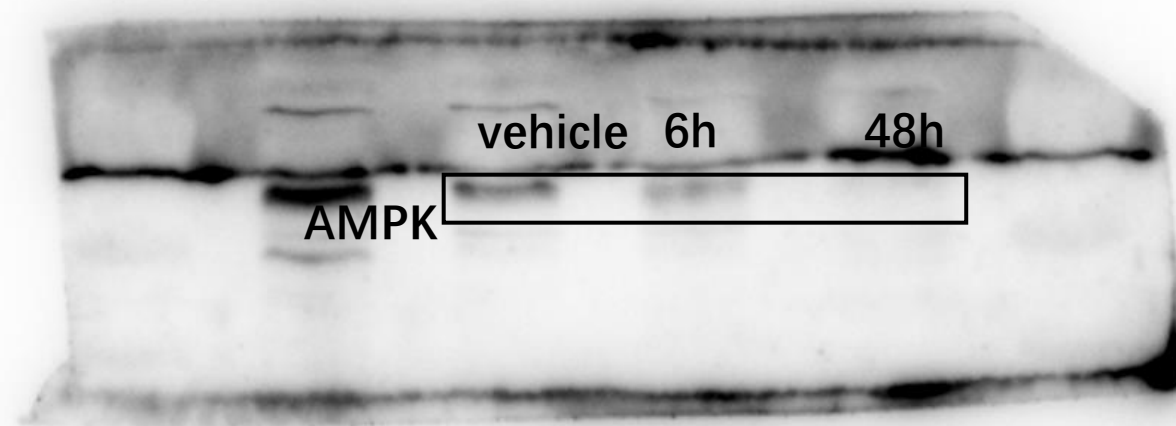



# P-AMPK

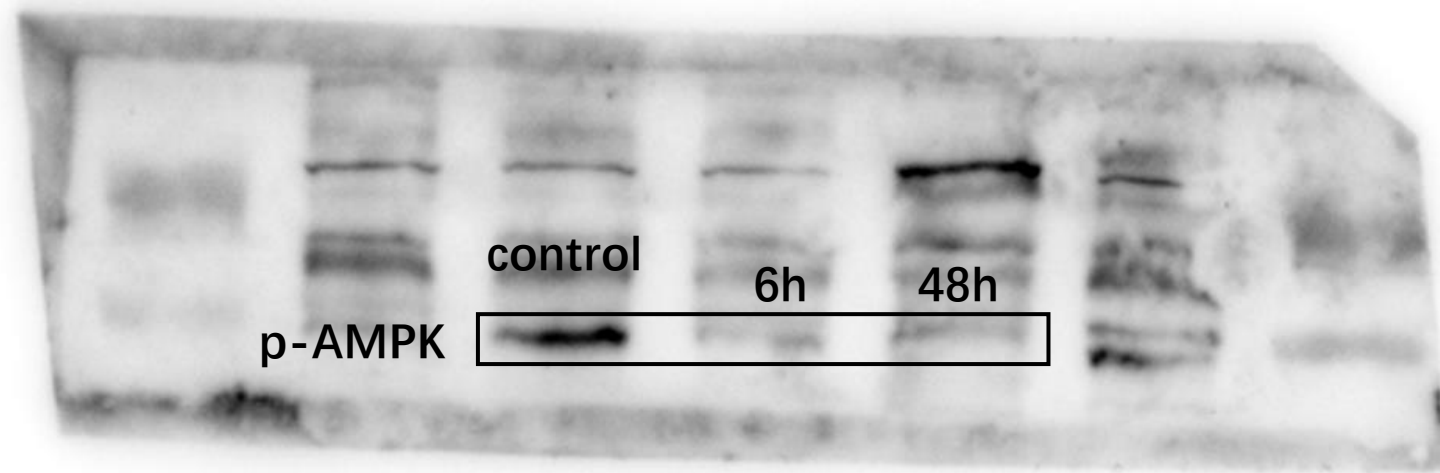

# EBP

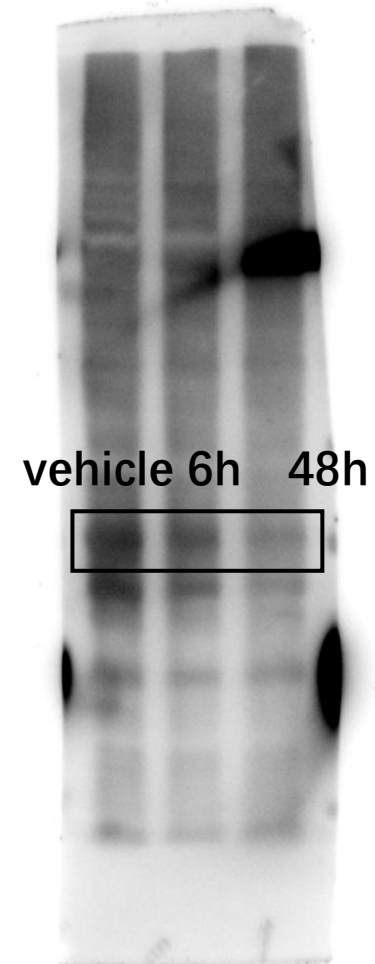

# GA

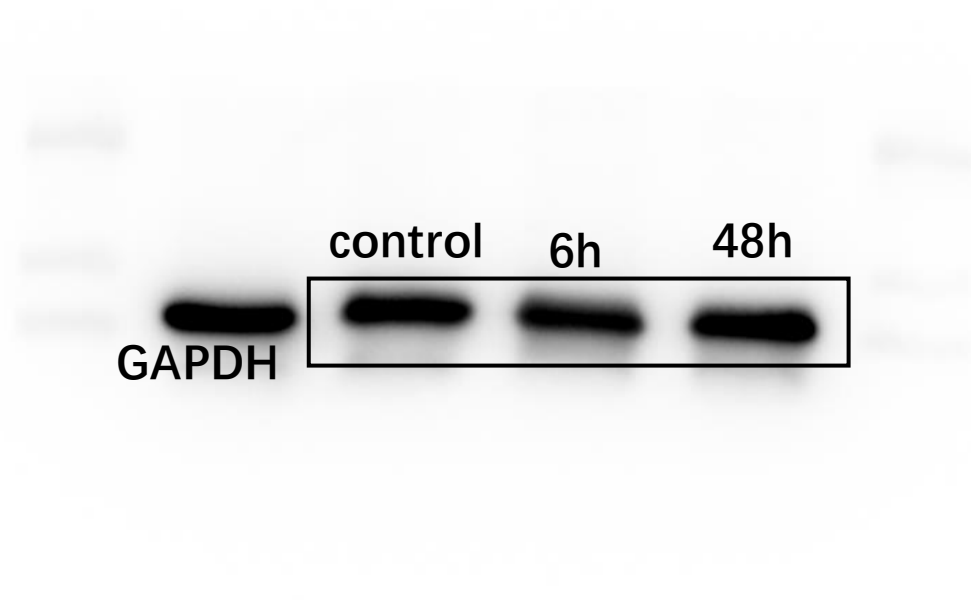

# P62-CQ

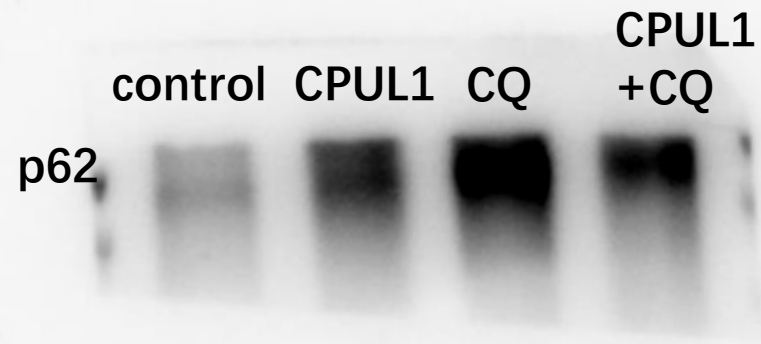

# LC3-CQ

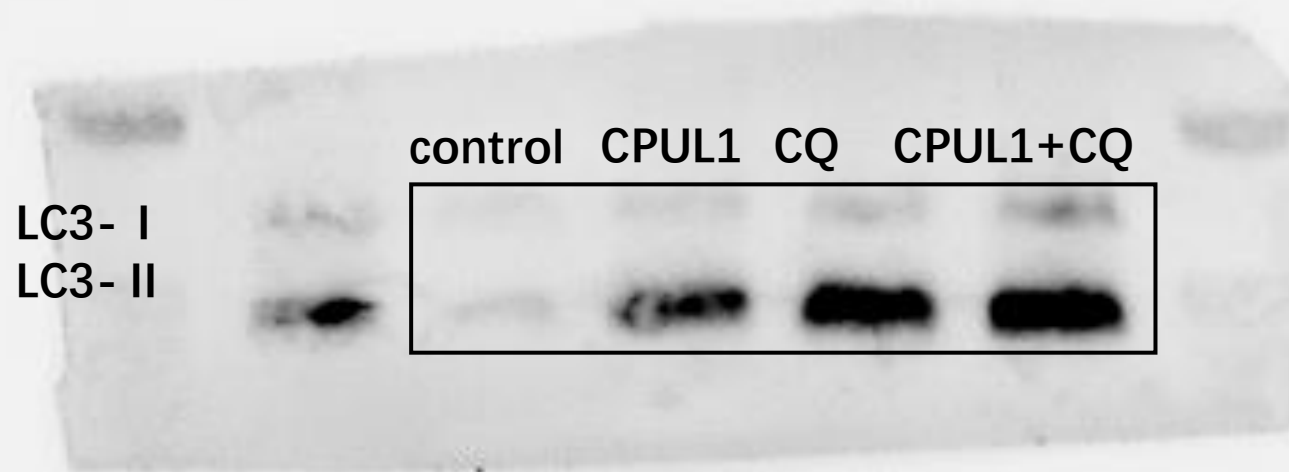

# GA-CQ

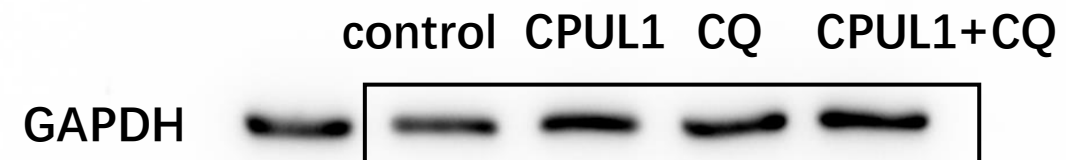

# p62-3MA

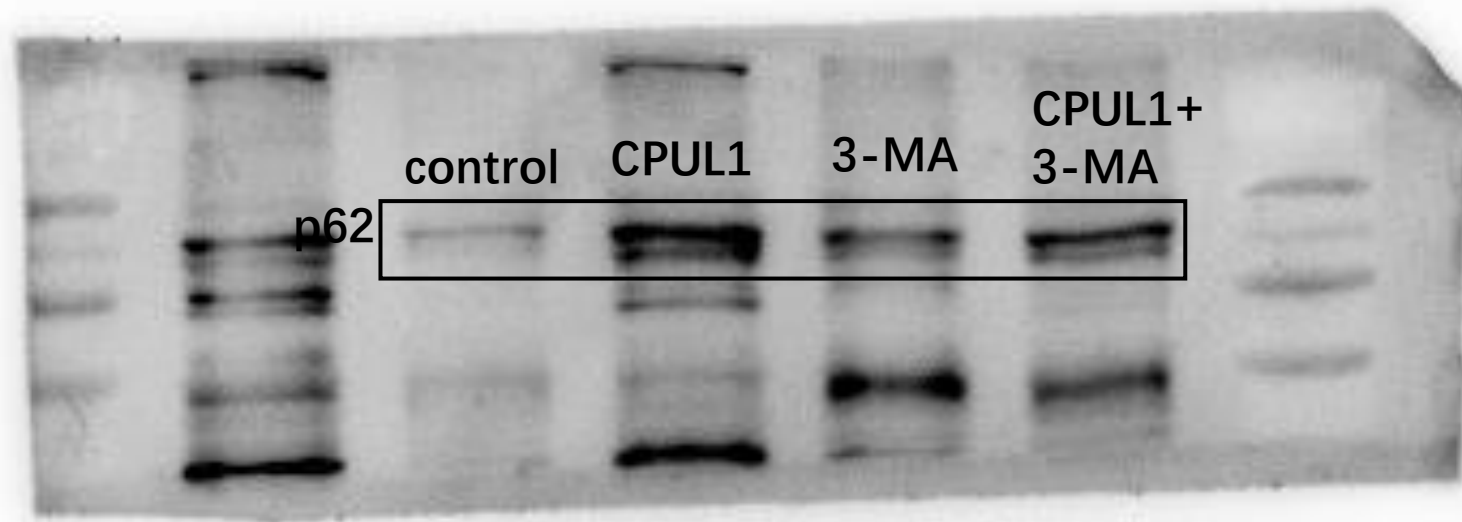

# LC3-3-MA

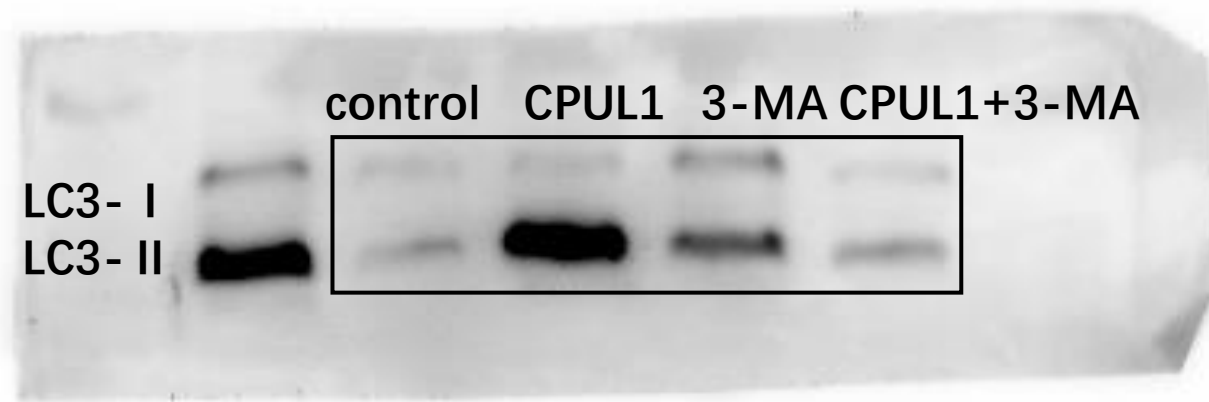



# GA-3-MA

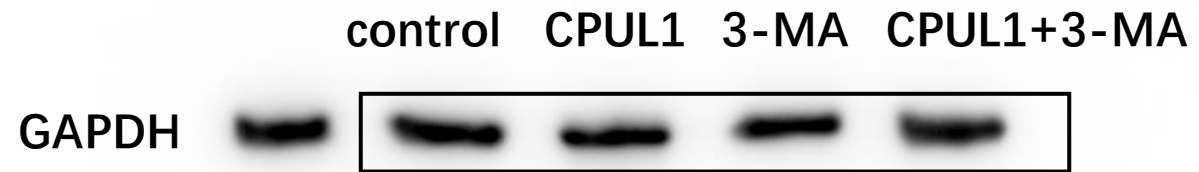

Supplement: s1 [file s1]
